# Supplementary material for: IL-6 pathway-driven investigation of response to IL-6 receptor inhibition in rheumatoid arthritis
Source: PubMed Central journal article supplement — BMJ Open. 2013 Aug 17;3(8):e003199. doi: 10.1136/bmjopen-2013-003199 (PMC3753518; doi:10.1136/bmjopen-2013-003199), 2013-08-17

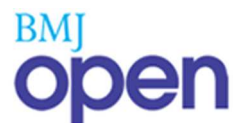

**IL-6 pathway-driven investigation of response to IL-6 receptor inhibition in rheumatoid arthritis**

|                                 |                                                                                                                                                                                                                                                                                                                                                                                                                                                     |
|---------------------------------|-----------------------------------------------------------------------------------------------------------------------------------------------------------------------------------------------------------------------------------------------------------------------------------------------------------------------------------------------------------------------------------------------------------------------------------------------------|
| Journal:                        | <i>BMJ Open</i>                                                                                                                                                                                                                                                                                                                                                                                                                                     |
| Manuscript ID:                  | bmjopen-2013-003199                                                                                                                                                                                                                                                                                                                                                                                                                                 |
| Article Type:                   | Research                                                                                                                                                                                                                                                                                                                                                                                                                                            |
| Date Submitted by the Author:   | 10-May-2013                                                                                                                                                                                                                                                                                                                                                                                                                                         |
| Complete List of Authors:       | Wang, Jianmei; Roche, Roche Products Limited<br>Platt, Adam; Roche, Roche Products Limited<br>Upmanyu, Ruchi; Roche, Roche Products Limited<br>Germer, Søren; Roche,<br>Lei, Guiyuan; Roche, Roche Products Limited<br>Rabe, Christina; Roche Diagnostics,<br>Benayed, Ryma; Roche,<br>Kenwright, Andy; Roche, Roche Products Limited<br>Hemmings, Andrew; Genentech,<br>Martin, Mitchell; Roche,<br>Harari, Olivier; Roche, Roche Products Limited |
| <b>Primary Subject Heading</b>: | Rheumatology                                                                                                                                                                                                                                                                                                                                                                                                                                        |
| Secondary Subject Heading:      | Immunology (including allergy)                                                                                                                                                                                                                                                                                                                                                                                                                      |
| Keywords:                       | RHEUMATOLOGY, IMMUNOLOGY, Rheumatology < INTERNAL MEDICINE                                                                                                                                                                                                                                                                                                                                                                                          |
|                                 |                                                                                                                                                                                                                                                                                                                                                                                                                                                     |

SCHOLARONE™  
Manuscripts

only

1  
2  
3  
4  
5  
6  
7  
8  
9  
10  
11  
12  
13  
14  
15  
16  
17  
18  
19  
20  
21  
22  
23  
24  
25  
26  
27  
28  
29  
30  
31  
32  
33  
34  
35  
36  
37  
38  
39  
40  
41  
42  
43  
44  
45  
46  
47  
48  
49  
50  
51  
52  
53  
54  
55  
56  
57  
58  
59  
60

**IL-6 pathway–driven investigation of response to IL-6 receptor inhibition in  
rheumatoid arthritis**

Jianmei Wang, PhD,<sup>1\*</sup> Adam Platt, PhD,<sup>1,\*</sup> Ruchi Upmanyu, MSc,<sup>1</sup> Søren Germer, PhD,<sup>2</sup>  
Guiyuan Lei, PhD,<sup>1</sup> Christina Rabe, PhD,<sup>3</sup> Ryma Benayed, PhD,<sup>2</sup> Andrew Kenwright,  
BA,<sup>1</sup> Andrew Hemmings, BA,<sup>4</sup> Mitchell Martin, PhD<sup>2</sup> and Olivier Harari, MD, PhD<sup>1</sup>

<sup>1</sup>Roche Products Ltd, Welwyn Garden City, United Kingdom; <sup>2</sup>Roche, Nutley, New  
Jersey, USA; <sup>3</sup>Roche Diagnostics GmbH, Penzberg, Germany; <sup>4</sup>Genentech (a member of  
the Roche group), South San Francisco, California, USA

\*These authors contributed equally to this work.

**Correspondence to**

Olivier Harari, MD  
Roche Products Ltd  
6 Falcon Way  
Welwyn Garden City, AL7 1TW, United Kingdom  
Telephone: +44 01707 366167  
Fax: 0044 1707 36 5887  
Email: olivier.harari@roche.com

**Running title:** IL-6 pathway and tocilizumab response

**Word count:** 2,786 (4,000 words maximum)

**References:** 30

1  
2  
3 **Tables:** 4  
4

5 **Figures:** 1 (colour)  
6  
7

8 **Supplementary material:** 2 tables, 1 figure  
9  
10

11  
12  
13  
14  
15 **Keywords:** rheumatoid arthritis; tocilizumab; biomarkers  
16  
17

18  
19  
20 **Primary subject heading:** Rheumatology  
21

22 **Secondary subject heading:** Immunology  
23  
24  
25  
26  
27  
28

### 29 **Clinical Trials Information** 30

31 Registration names and numbers of tocilizumab clinical trials on Clinicaltrials.gov are  
32

33 OPTION NCT00106548, TOWARD NCT00106574, RADIATE NCT00106522,  
34

35 AMBITION NCT00109408, LITHE NCT00106535, and MEASURE NCT00535782.  
36  
37  
38  
39  
40  
41  
42  
43  
44  
45  
46  
47  
48  
49  
50  
51  
52  
53  
54  
55  
56  
57  
58  
59  
60

**ABSTRACT**

**Objectives** To determine whether heterogeneity in interleukin-6 ( IL-6), IL-6 receptor and other components of the IL-6 signalling pathway/network, at the gene, transcript and protein levels, correlates with disease activity in patients with rheumatoid arthritis (RA) and with clinical response to tocilizumab.

**Design** Biomarker samples and clinical data for five phase 3 trials of tocilizumab were analysed using serum, genotype and transcript analyses. Linear regression was then used to assess the association between these markers and either baseline disease activity or treatment response.

**Results** Higher baseline serum IL-6 levels were significantly associated ( $P<0.0001$ ) with higher baseline DAS28, ESR, CRP and HAQ in patients with inadequate responses to disease-modifying anti-rheumatic drugs (DMARD-IR), patients with inadequate responses to anti-tumour necrosis factor (aTNF-IR) and patients who were naive/responders to MTX. Higher baseline serum IL-6 levels were also significantly associated with better clinical response to tocilizumab (versus placebo) as measured by cDAS28 in the pooled DMARD-IR ( $P<0.0001$ ) and MTX-naive populations ( $P=0.04$ ). However, the association with treatment response was weak. A threefold difference in baseline IL-6 level corresponded to only a 0.17-unit difference in DAS28 at week 16. IL-6 pathway SNPs and RNA levels also were not strongly associated with treatment response.

**Conclusions** Our analyses illustrate that the biological activity of a disease-associated molecular pathway may impact the benefit of a therapy targeting that pathway. However, the variation in pathway activity, as measured in blood, may not be a strong predictor.

1  
2  
3 These data suggest that the major contribution to variability in clinical responsiveness to  
4 therapeutics in RA remains unknown.  
5  
6

7  
8 **Trial registration** Clinicaltrials.gov OPTION NCT00106548, TOWARD  
9  
10 NCT00106574, RADIATE NCT00106522, AMBITION NCT00109408, LITHE  
11  
12 NCT00106535, and MEASURE NCT00535782  
13  
14  
15  
16  
17  
18  
19  
20  
21  
22  
23  
24  
25  
26  
27  
28  
29  
30  
31  
32  
33  
34  
35  
36  
37  
38  
39  
40  
41  
42  
43  
44  
45  
46  
47  
48  
49  
50  
51  
52  
53  
54  
55  
56  
57  
58  
59  
60

## Article Summary

### Article focus

- This study aimed to determine whether genetic polymorphism and heterogeneity in expression of IL-6 pathway/network components could explain the variability in baseline disease activity and clinical response to tocilizumab in patients with RA

### Key messages

- Higher baseline serum IL-6 levels were significantly associated with higher baseline disease activity (ESR, CRP, DAS28 and HAQ scores) in large populations of methotrexate-naive, DMARD-IR and aTNF-IR patients with RA. Higher baseline serum IL-6 levels also showed significant correlation with better clinical response to tocilizumab (cDAS28) in DMARD-IR and MTX-naive RA patients; however, the effect size was small, limiting the clinical usefulness of the marker in predicting treatment benefit. A threefold higher baseline IL-6 concentration corresponded to only an additional 0.17-unit decrease in DAS28 score in the DMARD-IR patients treated with tocilizumab
- None of the genetic polymorphisms in IL-6 or IL-6R showed any association with treatment response to tocilizumab
- No strong predictor of tocilizumab treatment response was identified; thus, the major factors underlying the patient-to-patient variability in clinical responsiveness to RA therapies remains unknown. This study illustrated well the

1  
2  
3 difficulty of identifying clinically useful predictive biomarkers in a complex  
4  
5 chronic disease  
6  
7  
8  
9

### 10 **Strengths and limitations of this study**

- 11  
12 • This study included well-characterised RA patients from five large phase 3  
13 controlled clinical trials. Biomarker data were available for more than 3,700  
14 patients. The extensive collection of RNA, DNA and serum samples allowed  
15 thorough investigation of the target-related heterogeneity  
16  
17
- 18 • This is the first demonstration of a significant association between baseline serum  
19 IL-6 levels and baseline disease activity in a large population of patients with RA,  
20 extending earlier findings of elevated serum IL-6 levels in RA patients compared  
21 with healthy controls  
22  
23
- 24 • The current biomarker analysis is focused on clinical usefulness and included only  
25 blood samples. Any potentially useful information about local regulation of IL-6  
26 pathway gene transcription and protein level in tissues involved in RA could not  
27 be obtained  
28  
29  
30  
31  
32  
33  
34  
35  
36  
37  
38  
39  
40  
41  
42  
43  
44  
45  
46  
47  
48  
49  
50  
51  
52  
53  
54  
55  
56  
57  
58  
59  
60

## INTRODUCTION

Interleukin-6 (IL-6) is a pleiotropic cytokine important in autoimmune diseases, including rheumatoid arthritis (RA).<sup>1</sup> High concentrations of IL-6 are found in the synovial fluid and sera of patients with RA. IL-6 involvement in RA pathogenesis includes involvement in B-cell proliferation and cytokine production, matrix metalloproteinase expression, acute-phase response and anaemia.<sup>2</sup>

IL-6 signal transduction occurs through either a classical (*cis*-) or a *trans*-signalling pathway. In *cis*-signalling, IL-6 binds to membrane-bound IL-6 receptor alpha (mIL-6R $\alpha$ ) before forming a trimer with gp130. A signalling complex is formed when this heterotrimer forms a dimer with another IL-6/mIL-6R/gp130 complex.<sup>1</sup> However, though gp130 is ubiquitously expressed, mIL-6R expression is restricted to hepatocytes and a subset of leukocytes. The *trans*-signalling pathway makes use of a soluble form of IL-6R (sIL-6R), to which IL-6 binds before forming a heterodimer with membrane-bound gp130, allowing cells that do not express mIL-6R to be activated by IL-6.<sup>1</sup>

Studies of tocilizumab,<sup>3-8</sup> a humanised monoclonal antibody targeted to IL-6R (membrane and soluble) that inhibits the interaction of IL-6 with its receptor, have shown meaningful amelioration of RA. However, the response is heterogeneous, consistent with the responses of other RA therapies. In a pooled analysis of patients who were inadequate responders to disease-modifying anti-rheumatic drug (DMARD-IR) in pivotal trials, 39% of those receiving 8 mg/kg tocilizumab for 24 weeks failed to achieve American College of Rheumatology (ACR) 20 response (a 20% improvement), whereas 18% did achieve



1  
2  
3 ACR70 response (a 70% improvement). Therefore, there is great interest in discovering  
4  
5  
6 biomarkers to aid in physician decision-making by the accurate prediction of clinical  
7  
8 response in individual patients.  
9

10  
11  
12 IL-6 and IL-6R levels vary in the sera of RA patients.<sup>9,10</sup> It has been suggested that some  
13  
14 of this heterogeneity is genetically determined. The rs8192284 A/C polymorphism is  
15  
16 found at the cleavage site of *mIL-6R* (Gln 357/Asp358) and has been associated with  
17  
18 increased sIL-6R levels and RA susceptibility,<sup>11,12</sup> whereas a polymorphism at -174 in  
19  
20 the promoter region of *IL-6* (rs1800795) affects transcription activity and, thus, serum  
21  
22 levels of IL-6.<sup>13</sup> Beyond RA, IL-6R polymorphisms that reduce cardiovascular risk<sup>14,15</sup>  
23  
24 attenuate classical IL-6 signalling by increasing the cleavage rate of mIL-6R (rs2228145  
25  
26 and rs8192284) and mirror the effects of tocilizumab on levels of IL-6 (increase), C-  
27  
28 reactive protein (CRP) and fibrinogen (decrease). In asthma, the rs4129267  
29  
30 polymorphism in IL-6R was found to be associated with increased risk, and Ferreira et  
31  
32 al<sup>16</sup> suggested that an IL-6R antagonist may show efficacy in asthma in a genotype-  
33  
34 dependent manner. The aim of this study was to determine whether baseline  
35  
36 heterogeneity in IL-6, IL-6R and other components of the IL-6 signalling  
37  
38 pathway/network, at the gene, transcript and protein levels, correlates with disease  
39  
40 activity in RA and clinical response to tocilizumab.  
41  
42  
43  
44  
45  
46  
47  
48  
49  
50  
51  
52  
53  
54  
55  
56  
57  
58  
59  
60

## METHODS

### Patients and samples

Serum specimens used in this study were collected from five pivotal phase 3 studies of tocilizumab in patients with RA: RADIATE,<sup>4</sup> OPTION,<sup>3</sup> TOWARD,<sup>5</sup> AMBITION<sup>6</sup> and LITHE<sup>7</sup> (Table 1). DNA samples were from RADIATE, OPTION and TOWARD, and RNA samples were from RADIATE. These trials evaluated tocilizumab (4 mg/kg or 8 mg/kg), administered every 4 weeks over a period of 24 weeks or longer, compared with placebo. The study populations differed according to background therapy with methotrexate (MTX) (OPTION, LITHE, RADIATE), any DMARD (TOWARD) or no DMARD (AMBITION). They also differed according to previous inadequate response to anti-tumour necrosis factor (aTNF) agents (RADIATE), MTX (OPTION, TOWARD, LITHE) or neither (AMBITION). The study protocols were approved by relevant institutional review boards or ethics committees, and written informed consent was obtained from each patient. The studies were carried out in full concordance with the principles of the Declaration of Helsinki and with the laws and regulations of the country in which the research was conducted. DNA and RNA samples were collected only from patients who gave separate informed consent.

### Serum analysis for IL-6 and sIL-6R

Three assays for serum IL-6 levels were used to analyse samples from TOWARD, as follows: Quantikine Human IL-6 Immunoassay (R&D Systems Inc., Minneapolis, MN), performed by Huntington Life Sciences (Huntington, UK) according to the instructions of the manufacturer (Roche Diagnostics, Penzberg, Germany) of the IL-6 assay<sup>17</sup>; IMPACT

1  
2  
3 platform,<sup>18</sup> performed by Roche Diagnostics; and RBM IL-6 assay, performed by Myriad  
4  
5 RBM (Austin, TX). Given the tight correlations among these three assays  
6  
7  
8 (Supplementary Figure 1A), we chose to analyse data from the Quantikine Human IL-6  
9  
10 Immunoassay (R&D Systems Inc.) because they were available for nearly all patients in  
11  
12 all five core studies. The limit of detection of this IL-6 assay is 3.12 pg/ml. The assay is  
13  
14 unaffected by the addition of recombinant human sIL-6R<sup>19</sup>; therefore, it can be assumed  
15  
16 that the data reflect the total concentration of IL-6 (i.e. the concentration of free IL-6 plus  
17  
18 the amount of IL-6 bound to sIL-6R).  
19  
20  
21

22  
23  
24 Serum concentrations of endogenous sIL-6R were measured using the Quantikine Human  
25  
26 sIL-6R Immunoassay (R&D Systems Inc.) by Huntington Life Sciences according to the  
27  
28 manufacturer's instructions. The sensitivity of the sIL-6R assay is 31.2 pg/ml. Measured  
29  
30 sIL-6R concentrations are insensitive to the addition of recombinant human IL-6 but are  
31  
32 sensitive to the presence of tocilizumab.<sup>20</sup> Therefore, it can be assumed that the sIL-6R  
33  
34 data presented reflect the total amount of free sIL-6R plus sIL-6R complexed with IL-6  
35  
36 plus (in samples that contain tocilizumab) an unquantified fraction of sIL-6R bound by  
37  
38 tocilizumab.  
39  
40  
41  
42  
43  
44

## 45 46 **Genotyping**

47  
48 DNA samples were genotyped using the HumanHap550k BeadChip version 3.0  
49  
50 (Illumina, San Diego, CA) and custom chips using the OPA genotyping assay. To reduce  
51  
52 the multiplicity of hypothesis testing, a targeted approach was taken. Three groups of  
53  
54 genes were considered in this analysis. Tier 1 markers consisted of 26 polymorphisms  
55  
56  
57  
58  
59  
60

1  
2  
3 within the *IL-6* and *IL-6R* regions (Supplementary Table 1). The association of these  
4 markers with treatment benefit represents primary hypotheses. Tier 2 markers consisted  
5 of 233 polymorphisms within 22 genes identified as in the IL-6 pathway, termed the IL-6  
6 canonical pathway (Supplementary Material). Tier 3 markers consisted of 1,005  
7 polymorphisms in 67 genes, identified with GeneGo (Carlsbad, CA) software, related to  
8 IL-6 signalling, herein termed the IL-6 network (Supplementary Material). Markers for  
9 tiers 2 and 3 correspond to the decreasing strength of the hypothesis and the increasing  
10 dimensions compared with tier 1 markers. This approach provides greater power in the  
11 confirmatory analysis for the primary biomarker hypothesis yet allows for focused  
12 exploratory analysis to address the secondary hypotheses.  
13  
14  
15  
16  
17  
18  
19  
20  
21  
22  
23  
24  
25  
26  
27  
28  
29

### 30 **Transcript analysis**

31  
32  
33 Two hundred thirty-three RNA samples, prepared from whole blood, at baseline were  
34 analysed using the GeneChip<sup>®</sup> Human Genome U133 Plus 2.0 Array (Affymetrix, Santa  
35 Clara, CA). After samples that failed quality control tests were removed (Supplementary  
36 Material), data for the remaining 217 samples were normalised using the Robust Multi-  
37 Array Analysis normalisation<sup>21</sup> (Bioconductor). Transcripts for *IL-6*, *IL-6R*, IL-6 signal  
38 transducer (*IL-6ST*) and *gp130* were extracted from the normalised data. IL-6 transcript  
39 levels were not analysed because of the low levels of signal observed. Three probe sets  
40 targeting *IL-6R* were analysed. Of those, 205945\_at and 217489\_at expression levels  
41 were found to be strongly correlated (Pearson's  $r^2=0.75$ ), and the third probe set,  
42 226333\_at, had a weaker correlation with the other two (Pearson's  $r^2=0.34$  and  $r^2=0.38$ ).  
43  
44  
45  
46  
47  
48  
49  
50  
51  
52  
53  
54  
55  
56  
57  
58  
59  
60

1  
2  
3 These three probe sets represent the primary hypothesis in RNA transcripts. In addition,  
4  
5 seven probe sets from *IL-6ST* were analysed as secondary markers.  
6  
7  
8  
9

### 10 **Measures of disease activity and clinical response**

11  
12 Six different measures were used for disease activity at baseline: erythrocyte  
13  
14 sedimentation rate (ESR), CRP, swollen joint count at 28 joints (SJC28), tender joint  
15  
16 count at 28 joints (TJC28) and Health Assessment Questionnaire (HAQ), with disease  
17  
18 activity at 28 joints (DAS28; derived from the four core components of ESR, SJC, TJC  
19  
20 and patient global assessment) considered the primary end point. As a measurement of  
21  
22 treatment response, change in DAS28 from baseline at week 16 (cDAS28) was mainly  
23  
24 used. Unlike dichotomous responder criteria (e.g. ACR response, DAS28 remission and  
25  
26 clinical disease activity index remission), this continuous measure captures the range of  
27  
28 individual responses and is therefore more sensitive in detecting the effect of biomarkers  
29  
30 across different levels of prevalence. In all studies except AMBITION, patients were  
31  
32 allowed to enter escape therapy at 16 weeks if they had inadequate responses. Therefore,  
33  
34 cDAS28 was used at week 16 to increase the sample size and to minimise bias.  
35  
36  
37  
38  
39  
40  
41  
42  
43  
44

### 45 **Statistical analysis**

46  
47 Table 2 provides a summary of all markers analysed. Quality control analyses were  
48  
49 performed for genotyping and gene expression data, as described in the Supplementary  
50  
51 Material; assays and samples with poor data quality were removed. Distribution was  
52  
53 assessed for each marker, and appropriate transformation was applied before further  
54  
55 analysis. Minor allele frequencies and Hardy-Weinberg equilibrium were calculated for  
56  
57  
58  
59  
60

1  
2  
3 single nucleotide polymorphisms (SNPs). Given that the distribution within each gene  
4  
5 expression probe set was approximately normal, no further transformation was applied.  
6  
7  
8 Log transformation was applied to the protein markers IL-6 and sIL-6R because of the  
9  
10 skewed distribution of raw values.  
11

12  
13  
14  
15 Correlations among the baseline markers were assessed within each sample type to  
16  
17 enable understanding of the amount of information shared among the assays. For SNPs,  
18  
19 linkage disequilibrium coefficients within IL-6 and IL-6R were obtained from HapMap22  
20  
21 based on the CEU (Utah residents of Northern and Western European ancestry from the  
22  
23 CEPH collection) data. For the gene expression markers, correlation coefficients were  
24  
25 calculated among probe sets within *IL-6R* and *IL-6ST*. For the proteins, correlation was  
26  
27 calculated among the three assays for IL-6 and between IL-6 and sIL-6R. Pearson or  
28  
29 Spearman rank correlation was used as appropriate.  
30  
31  
32

33  
34  
35  
36 Linear regression was used to assess the association between markers with baseline  
37  
38 disease activity and markers with treatment response. Because of the skewed distribution  
39  
40 of the raw values, log(ESR) and log(CRP+1) were used in the regression analysis. All  
41  
42 patients were included in the regression analysis of baseline disease activity. In the  
43  
44 regression analysis of cDAS28, separate analyses were undertaken in patients treated  
45  
46 with tocilizumab and those administered placebo. Given that baseline DAS28 is strongly  
47  
48 associated with change in DAS28 at week 16, it was included as a covariate in all models.  
49  
50  
51 No additional covariates were included in the model. In addition, the number of shared  
52  
53  
54  
55  
56  
57  
58  
59  
60

1  
2  
3 epitope alleles<sup>22</sup> (0, 1 or 2) and tocilizumab dose were used as covariates in the analysis  
4  
5 of genetic data.  
6  
7  
8  
9

10 The numbers of genetic markers tested were 18, 233 and 1,004, respectively, for the tier  
11  
12 1, 2 and 3 markers. In addition, six baseline end points were used on the baseline disease  
13  
14 association analysis. Analyses were undertaken in the white population and the all-patient  
15  
16 population. To adjust for multiple testing, the false discovery rate (FDR)<sup>23</sup> was calculated  
17  
18 within each tier and within the white population and the all-patient population. This FDR  
19  
20 accounted for the multiplicity of markers and the end points.  
21  
22  
23  
24  
25  
26

27 To help interpret the outcome of the regression analysis and to enable direct comparison  
28  
29 of the analysis results across all markers, consistent representations of the results were  
30  
31 used. For continuous markers, the regression coefficients were standardised to reflect  
32  
33 how many units of change in the end points corresponded to a difference of 1 standard  
34  
35 deviation (SD) in the marker value. For the SNP markers, an allelic model was used (i.e.  
36  
37 two copies of the minor allele had twice the effect of one copy). The regression  
38  
39 coefficient corresponded to the change in end point per copy of minor allele.  
40  
41  
42  
43  
44  
45

## 46 **RESULTS**

### 47 **Associations with baseline disease activity**

48  
49 Higher baseline serum IL-6 levels were significantly associated with higher baseline  
50  
51 DAS28, ESR, CRP and HAQ in all three populations analysed, with  $P < 0.0001$  in most  
52  
53 cases (Table 3). The strongest association was observed between CRP and IL-6, for a  
54  
55  
56  
57  
58  
59  
60

1  
2  
3 correlation coefficient of 0.29 to 0.36 in three populations (Supplementary Figure 1B).  
4  
5 IL-6 was not strongly associated with SJC28 or TJC28. Baseline sIL-6R was not strongly  
6  
7 associated with any baseline disease activity measures.  
8  
9

10  
11  
12 Among the baseline RNA transcripts, an association was observed between the IL-6R  
13  
14 transcript and CRP and ESR at baseline (data not shown). No association was found with  
15  
16 the other baseline disease activity measures. Association with CRP and ESR was also  
17  
18 observed, to a lesser degree, for an IL-6ST transcript.  
19  
20  
21

22  
23  
24 After correction for multiple testing, no significant associations were found for any of the  
25  
26 *IL-6* or *IL-6R* polymorphisms genotyped with baseline disease activity. Of the 1,237  
27  
28 polymorphisms representing 22 genes in the IL-6 canonical pathway, 67 additional genes  
29  
30 in the IL-6 network, six baseline disease activity end points and two patient populations  
31  
32 (all-patient; white), six associations were found to have borderline significance after  
33  
34 adjusting for multiple testing, with an FDR of approximately 5%. There were SNPs in  
35  
36 *TOLLIP* and *RUNXI* versus ESR and SNPs in *IL1RAPLI* versus SJC and ESR. Such  
37  
38 borderline significance meant the association should be treated as a weak hypothesis.  
39  
40  
41  
42  
43  
44  
45

#### 46 **Associations with clinical response to tocilizumab**

47  
48 Higher baseline serum IL-6 concentrations were significantly associated with better  
49  
50 clinical response to tocilizumab but not to placebo, as measured by cDAS28 in the pooled  
51  
52 DMARD-IR population ( $P < 0.0001$ ) (Supplementary Table 2, Figure 1). The same effect  
53  
54 was observed in the MTX-naive population ( $P = 0.04$ ). In the aTNF-IR population, the  
55  
56  
57  
58  
59  
60



1  
2  
3 association was not significant, partially because of the smaller sample size. In the  
4  
5 DMARD-IR population, a threefold difference in baseline IL-6 concentration, equivalent  
6  
7 to 1 SD in the baseline log(IL-6) distribution, corresponded to a small difference of 0.17  
8  
9 units in cDAS28 score at week 16. The association between serum IL-6 level and  
10  
11 achievement of DAS28 remission (DAS28 <2.6) was analysed using receiver operating  
12  
13 characteristic analysis in the pooled DMARD-IR population treated with tocilizumab  
14  
15 (n=1,547). The area under the curve was only 0.59, suggesting that baseline serum IL-6  
16  
17 levels provided very little discrimination between those achieving and those not  
18  
19 achieving DAS28 remission. In the placebo group, the direction of association was  
20  
21 opposite that of tocilizumab-treated patients, indicating that baseline serum IL-6 level is  
22  
23 not a general prognostic factor for clinical response in RA.  
24  
25  
26  
27  
28  
29  
30  
31

32 Baseline sIL-6R concentration in serum had no effect on treatment response in either the  
33  
34 tocilizumab or the placebo group (Supplementary Table 2). IL-6R whole blood mRNA  
35  
36 (in RADIATE) was not associated with clinical response to tocilizumab or placebo  
37  
38 treatment (Supplementary Table 2). No *IL-6* or *IL-6R* polymorphisms were associated  
39  
40 with cDAS28 after correction for multiple testing. Although rs2069840 and rs12700386  
41  
42 had a raw  $P < 0.05$  (Table 4), the estimated effect size was small. Each copy of the minor  
43  
44 allele for rs2069840 corresponded to only a 0.3-unit difference in cDAS28. Of the SNPs  
45  
46 in the canonical and the network or signalling pathway, rs973767 (an intronic SNP in  
47  
48 *PTPN2*) had the lowest P value ( $5.7 \times 10^{-5}$ ) but was not significant after correction for  
49  
50 multiple testing (FDR=0.057; Table 4).  
51  
52  
53  
54  
55  
56  
57  
58  
59  
60

## DISCUSSION

We have investigated the associations among a number of DNA, RNA and protein biomarkers directly related to IL-6 signalling (Table 2) with baseline disease activity and treatment benefit from tocilizumab (Table 1). We demonstrate the modest association between serum IL-6 levels and clinical disease activity as measured by DAS28 and HAQ. Although serum IL-6 levels have previously been shown to be elevated in patients with RA compared with controls,<sup>9,24</sup> this is the first time a significant correlation between IL-6 level and disease activity has been demonstrated in a large population. IL-6 level accounted for only a small component of observed variance in disease activity (Supplementary Table 2, Figure 1). Of the four DAS28 components, serum IL-6 level was most strongly associated with ESR/CRP. This is not surprising given the pivotal role of IL-6 (and the pronounced inhibitory effect of tocilizumab) on the acute-phase response.<sup>25</sup> Interestingly, HAQ, a measure of patient-reported disability independent of inflammation, also had a significant association with serum IL-6 level.

Littman<sup>26</sup> proposes that IL-6/tocilizumab may represent 'low-hanging fruit' in terms of personalised health care in RA, but our analysis suggests otherwise. Higher baseline DAS28 is associated with higher change in DAS28 in response to therapy (Supplementary Figure 1C). When change in DAS28 is corrected for baseline DAS28, only a weak association with serum IL-6 is observed.

It is possible that discordance in IL-6 signalling activity between blood and synovial tissue provides an explanation for the lack of association with blood samples in our study.

1  
2  
3 However, this cannot explain the negative genetic data. The lack of genetic associations  
4  
5 between polymorphisms in *IL-6R* (including those determining sIL-6R levels) and  
6  
7 baseline disease activity<sup>11,27</sup> show that sIL-6R levels, though highly variable, are not  
8  
9 appreciably different between patients with RA and those who are healthy.<sup>28,29</sup>  
10  
11

12  
13  
14 Our analyses illustrate that in a disease such as RA, variation in the abundance of a  
15  
16 therapeutic target may not be a strong predictor of patient benefit. In particular, the  
17  
18 response to tocilizumab is not dependent on IL-6R SNPs, which were found to be  
19  
20 associated with asthma and cardiovascular risk. In addition, a genome-wide association  
21  
22 approach using 1,600 patients from five controlled clinical trials also did not yield any  
23  
24 strong predictor to tocilizumab treatment response.<sup>30</sup> These data suggest that the major  
25  
26 contribution to variability in clinical responsiveness to therapeutics in RA remains  
27  
28 unknown, and they illustrate the challenges of identifying predictive biomarkers, even in  
29  
30 large, well-conducted studies.  
31  
32  
33  
34  
35  
36  
37  
38  
39  
40  
41  
42  
43  
44  
45  
46  
47  
48  
49  
50  
51  
52  
53  
54  
55  
56  
57  
58  
59  
60

## Acknowledgements

We thank Stefan Palme for providing the IL-6 data measured on the IMPACT platform; Chih Jian Lih and Mickey Williams for providing the gene expression data; Yan Li for help with the gene expression data QC; Gregg Silverman, Ann Begovich, Paul Cutler and Friedemann Krause for helpful discussions; and Santo D'Angelo, PhD, for third-party writing assistance.

This study was funded by Roche. Support for third-party writing assistance for this manuscript was provided by F. Hoffmann-La Roche Ltd.

## Competing interests

All authors are (or were at the time of the study) employees of Roche or Genentech, a member of the Roche group, and four authors (AH, AK, OH and RU) also own stock in Roche.

## Author contributions

JW designed the study, conducted research, conducted the literature search, analysed and interpreted the data and drafted the manuscript; AP designed the study, conducted research, conducted the literature search, collected data, analysed and interpreted the data, oversaw data collection and drafted the manuscript ; RU analysed and interpreted the data and drafted the manuscript; SG designed the study and collected data; GL analysed and interpreted the data; CR analysed and interpreted the data; RB designed the study,

1  
2  
3 collected data and analysed the data; AK analysed and interpreted the data; AH designed  
4 the study and collected data; MM designed the study; OH interpreted the data and drafted  
5 the manuscript.  
6  
7  
8

9  
10 All authors revised the manuscript critically for important intellectual content and  
11 approved the final version for submission.  
12  
13

### 14 15 16 17 **Ethics approval**

18  
19 The study protocols were approved by relevant institutional review boards or ethics  
20 committees, and written informed consent was obtained from each patient. The studies  
21 were carried out in full concordance with the principles of the Declaration of Helsinki  
22 and with the laws and regulations of the country in which the research was conducted.  
23  
24  
25  
26  
27  
28  
29  
30  
31  
32  
33  
34  
35  
36  
37  
38  
39  
40  
41  
42  
43  
44  
45  
46  
47  
48  
49  
50  
51  
52  
53  
54  
55  
56  
57  
58  
59  
60  
DNA and RNA samples were collected only from patients who gave separate informed  
consent.

### 37 38 **Data sharing**

39  
40 No additional data are available at this time.  
41  
42  
43  
44

45  
46  
47  
48  
49  
50  
51  
52  
53  
54  
55  
56  
57  
58  
59  
60  
**Funding:** This study was funded by Roche. Support for third-party writing assistance for  
this manuscript was provided by F. Hoffmann-La Roche Ltd.

## References

1. Cronstein BN. Interleukin-6—a key mediator of systemic and local symptoms in rheumatoid arthritis. *Bull NYU Hosp Joint Dis* 2007;65:S11-15.
2. Wrighting DM, Andrews NC. Interleukin-6 induces hepcidin expression through STAT3. *Blood* 2006;108:3204-09.
3. Smolen JS, Beaulieu A, Rubbert-Roth A, Ramos-Remus C, Rovensky J, Alecock E, et al. Effect of interleukin-6 receptor inhibition with tocilizumab in patients with rheumatoid arthritis (OPTION study): a double-blind, placebo-controlled, randomised trial. *Lancet* 2008;371:987-97.
4. Emery P, Keystone E, Tony HP, Cantagrel A, van Vollenhoven R, Sanchez A, et al. IL-6 receptor inhibition with tocilizumab improves treatment outcomes in patients with rheumatoid arthritis refractory to anti-tumour necrosis factor biologicals: results from a 24-week multicentre randomised placebo-controlled trial. *Ann Rheum Dis* 2008;67:1516-23.
5. Genovese MC, McKay JD, Nasonov EL, Mysler EF, da Silva NA, Alecock E et al. Interleukin-6 receptor inhibition with tocilizumab reduces disease activity in rheumatoid arthritis with inadequate response to disease-modifying antirheumatic drugs: the tocilizumab in combination with traditional disease-modifying antirheumatic drug therapy study. *Arthritis Rheum* 2008;58:2968-80.

- 1  
2  
3  
4  
5  
6  
7  
8  
9  
10  
11  
12  
13  
14  
15  
16  
17  
18  
19  
20  
21  
22  
23  
24  
25  
26  
27  
28  
29  
30  
31  
32  
33  
34  
35  
36  
37  
38  
39  
40  
41  
42  
43  
44  
45  
46  
47  
48  
49  
50  
51  
52  
53  
54  
55  
56  
57  
58  
59  
60
6. Jones G, Sebba A, Gu J, Lowenstein MB, Calvo A, Gomez-Reino JJ, et al. Comparison of tocilizumab monotherapy versus methotrexate monotherapy in patients with moderate to severe rheumatoid arthritis: the AMBITION study. *Ann Rheum Dis* 2010;69:88-96.
  7. Kremer JM, Blanco R, Brzosko S, Burgos-Vargas R, Halland AM, Vernon E, et al. Tocilizumab inhibits structural joint damage in rheumatoid arthritis patients with inadequate responses to methotrexate: results from the double-blind treatment phase of a randomized placebo-controlled trial of tocilizumab safety and prevention of structural joint damage at one year. *Arthritis Rheum* 2011;63:609-21.
  8. Nishimoto N, Yoshizaki K, Miyasaka N, Yamamoto K, Kawai S, Takeuchi T, et al. Treatment of rheumatoid arthritis with humanized anti-interleukin-6 receptor antibody: a multicenter, double-blind, placebo-controlled trial. *Arthritis Rheum* 2004;50:1761-69.
  9. Madhok R, Crilly A, Watson J, Capell HA. Serum interleukin 6 levels in rheumatoid arthritis: correlations with clinical and laboratory indices of disease activity. *Ann Rheum Dis* 1993;52:232-34.
  10. Robak T, Gladalska A, Stepień H, Robak E. Serum levels of interleukin-6 type cytokines and soluble interleukin-6 receptor in patients with rheumatoid arthritis. *Mediators Inflamm* 1998;7:347-53.

- 1  
2  
3 11. Galicia JC, Tai H, Komatsu Y, Shimada Y, Akazawa K, Yoshie H. Polymorphisms  
4  
5 in the IL-6 receptor (IL-6R) gene: strong evidence that serum levels of soluble IL-  
6  
7 6R are genetically influenced. *Genes Immun* 2004;5:513-16.  
8  
9
- 10  
11 12. Marinou I, Walters K, Winfield J, Bax DE, Wilson AG. A gain of function  
12  
13 polymorphism in the interleukin 6 receptor influences RA susceptibility. *Ann*  
14  
15 *Rheum Dis* 2010;69:1191-94.  
16  
17
- 18  
19 13. Fishman D, Faulds G, Jeffery R, Mohamed-Ali V, Yudkin JS, Humphries S, et al.  
20  
21 The effect of novel polymorphisms in the interleukin-6 (IL-6) gene on IL-6  
22  
23 transcription and plasma IL-6 levels, and an association with systemic-onset  
24  
25 juvenile chronic arthritis. *J Clin Invest* 1998;102:1369-76.  
26  
27
- 28  
29 14. Hingorani AD, Casas JP. The interleukin-6 receptor as a target for prevention of  
30  
31 coronary heart disease: a mendelian randomisation analysis. *Lancet* 2012;379:1214-  
32  
33 24.  
34  
35
- 36  
37 15. IL6R Genetics Consortium Emerging Risk Factors Collaboration, Sarwar N,  
38  
39 Butterworth AS, Freitag DF, Gregson J, Willeit P, et al. Interleukin-6 receptor  
40  
41 pathways in coronary heart disease: a collaborative meta-analysis of 82 studies.  
42  
43 *Lancet* 2012;379:1205-13.  
44  
45
- 46  
47 16. Ferreira MA, Matheson MC, Duffy DL, Marks GB, Hui J, Le Souëf P, et al.  
48  
49 Identification of IL6R and chromosome 11q13.5 as risk loci for asthma. *Lancet*  
50  
51 2011;378:1006-14.  
52  
53  
54  
55  
56  
57  
58  
59  
60



- 1  
2  
3  
4  
5  
6  
7  
8  
9  
10  
11  
12  
13  
14  
15  
16  
17  
18  
19  
20  
21  
22  
23  
24  
25  
26  
27  
28  
29  
30  
31  
32  
33  
34  
35  
36  
37  
38  
39  
40  
41  
42  
43  
44  
45  
46  
47  
48  
49  
50  
51  
52  
53  
54  
55  
56  
57  
58  
59  
60
17. Fraunberger P, Pfeiffer M, Cremer P, Holler E, Nagel D, Dehart I, et al. Validation of an automated enzyme immunoassay for Interleukin-6 for routine clinical use. *Clin Chem Lab Med* 1998;36:797-801.
  18. Claudon A, Vergnaud P, Valverde C, Mayr A, Klause U, Garnero P. New automated multiplex assay for bone turnover markers in osteoporosis. *Clin Chem* 2008;54:1554-63.
  19. R&D Systems Inc. Quantikine<sup>®</sup> ELISA human IL-6 immunoassay. <http://www.rndsystems.com/pdf/d6050.pdf>. Accessed 13 November 2012.
  20. R&D Systems Inc. Quantikine<sup>®</sup> ELISA human IL-6 sR immunoassay. <http://www.rndsystems.com/pdf/dr600.pdf>. Accessed on June 28, 2012.
  21. Irizarry RA, Bolstad BM, Collin F, Cope LM, Hobbs B, Speed TP. Summaries of AffymetrixGeneChip probe level data. *Nucleic Acids Res* 2003;31:e15.
  22. Gregersen PK, Silver J, Winchester RJ. The shared epitope hypothesis: an approach to understanding the molecular genetics of susceptibility to rheumatoid arthritis. *Arthritis Rheum* 1987;30:1205-13.
  23. Benjamini Y, Hochberg Y. Controlling the false discovery rate: a practical and powerful approach to multiple testing. *J Royal Stat Soc* 1995;57:289-300.
  24. Chung SJ, Kwon YJ, Park MC, Park YB, Lee SK. The correlation between increased serum concentrations of interleukin-6 family cytokines and disease activity in rheumatoid arthritis patients. *Yonsei Med J* 2011;52:113-20.

- 1  
2  
3  
4  
5  
6  
7  
8  
9  
10  
11  
12  
13  
14  
15  
16  
17  
18  
19  
20  
21  
22  
23  
24  
25  
26  
27  
28  
29  
30  
31  
32  
33  
34  
35  
36  
37  
38  
39  
40  
41  
42  
43  
44  
45  
46  
47  
48  
49  
50  
51  
52  
53  
54  
55  
56  
57  
58  
59  
60
25. Heinrich PC, Castell JV, Andus T. Interleukin-6 and the acute phase response. *Biochem J* 1990;265:621-36.
26. Littman BH. Tocilizumab and missed personalized medicine opportunities for patients with rheumatoid arthritis? *Arthritis Rheum* 2009;60:1565-66.
27. Rafiq S, Frayling TM, Murray A, Hurst A, Stevens K, Weedon MN, et al. A common variant of the interleukin 6 receptor (IL-6r) gene increases IL-6r and IL-6 levels, without other inflammatory effects. *Genes Immun* 2007;8:552-59.
28. De Benedetti F, Pignatti P, Gerloni V, Massa M, Sartirana P, Caporali R, et al. Differences in synovial fluid cytokine levels between juvenile and adult rheumatoid arthritis. *J Rheumatol* 1997;24:1403-09.
29. Frieling JT, Sauerwein RW, Wijdenes J, Hendriks T, van der Linden CJ. Soluble interleukin 6 receptor in biological fluids from human origin. *Cytokine* 1994;6:376-81.
30. Wang J, Bansal AT, Martin M, Germer S, Benayed R, Essioux L, et al. Genome-wide association analysis implicates the involvement of eight loci with response to tocilizumab for the treatment of rheumatoid arthritis. *Pharmacogenomics J* doi: 10.1038/tpj.2012.8 [Epub ahead of print 10 Apr 2012].

## TABLES

**Table 1.** Demographics of patients from whom biological samples were collected and analysed and whose data passed a quality control check

| Sample type        | DNA               |                   |                     | RNA               |                   |                   | Serum               |                   |                   |
|--------------------|-------------------|-------------------|---------------------|-------------------|-------------------|-------------------|---------------------|-------------------|-------------------|
| Study              | OPTION            | RADIATE           | TOWARD              | RADIATE           | OPTION            | LITHE             | TOWARD              | AMBITION          | RADIATE           |
| Patient population | MTX-IR            | MTX-IR            | DMARD-IR            | aTNF-IR           | MTX-IR            | MTX-IR            | DMARD-IR            | MTX naive or free | aTNF-IR           |
| Treatment          | 8 mg/kg TCZ + MTX | 8 mg/kg TCZ + MTX | 8 mg/kg TCZ + DMARD | 8 mg/kg TCZ + MTX | 8 mg/kg TCZ + MTX | 8 mg/kg TCZ + MTX | 8 mg/kg TCZ + DMARD | 8 mg/kg TCZ + MTX | 8 mg/kg TCZ + MTX |
|                    | 4 mg/kg TCZ + MTX | 4 mg/kg TCZ + MTX |                     | 4 mg/kg TCZ + MTX | 4 mg/kg TCZ + MTX | 4 mg/kg TCZ + MTX |                     |                   | 4 mg/kg TCZ + MTX |
|                    | MTX               | MTX               | DMARD               | MTX               | MTX               | MTX               | DMARD               | MTX               | MTX               |
| Total patients, n  | 286               | 178               | 463                 | 217               | 603               | 1126              | 1010                | 581               | 431               |
| TCZ, n             | 189               | 119               | 301                 | 151               | 409               | 753               | 661                 | 244               | 289               |
| MTX, n             | 97                | 59                | 162                 | 66                | 194               | 373               | 349                 | 337               | 142               |
| Age, years         | 51.3 (11.1)       | 51.5 (12.4)       | 54.2 (12.6)         | 53.2 (11.9)       | 51.0 (12.2)       | 51.9 (12.4)       | 53.4 (12.9)         | 50.3 (13.0)       | 52.9 (12.6)       |
| Female, %          | 79.0              | 79.8              | 81.0                | 82.40             | 81.8              | 82.9              | 81.7                | 80.4              | 81.4              |
| Height, cm         | 163 (9)           | 165 (8)           | 164 (9)             | 165 (8)           | 162 (9)           | 162 (9)           | 163 (9)             | 163 (9)           | 165 (8)           |
| Weight, kg         | 73 (17)           | 77 (19)           | 76 (18)             | 77 (20)           | 79 (17)           | 73 (19)           | 74 (19)             | 73 (18)           | 75 (18)           |
| RA duration, years | 7.8 (7.3)         | 11.1 (8.3)        | 9.7 (9.1)           | 12.1 (9.6)        | 7.6 (7.3)         | 9.2 (8.0)         | 9.6 (8.8)           | 6.4 (8.2)         | 11.6 (9.1)        |
| RF positive, %     | 76.2              | 79.8              | 75.6                | 76.5              | 77.6              | 82.1              | 77.1                | 72.5              | 75.2              |
| White, %           | 73.8              | 93.3              | 76.2                | Not applicable    |                   |                   | Not applicable      |                   |                   |
| TCZ, n             | 141               | 109               | 233                 | Not applicable    |                   |                   | Not applicable      |                   |                   |
| MTX, n             | 70                | 57                | 120                 | Not applicable    |                   |                   | Not applicable      |                   |                   |
| DAS28              | 6.8 (0.9)         | 6.8 (1)           | 6.6 (1)             | 6.8 (0.9)         | 6.8 (0.9)         | 6.5 (0.9)         | 6.7 (1.0)           | 6.8 (0.9)         | 6.8 (1.0)         |
| HAQ                | 1.6 (0.6)         | 1.7 (0.6)         | 1.5 (0.6)           | 1.7 (0.6)         | 1.6 (0.6)         | 1.5 (0.6)         | 1.5 (0.6)           | 1.5 (0.6)         | 1.7 (0.6)         |
| SJC                | 20.9 (11.3)       | 18.8 (10.6)       | 20.5 (11.9)         | 18.1 (9.8)        | 20.0 (11.2)       | 16.9 (9.4)        | 19.6 (11.5)         | 19.8 (11.2)       | 18.9 (10.6)       |
| TJC                | 32.3 (15.2)       | 31.2 (15.2)       | 30.1 (15.8)         | 31.4 (15.1)       | 32.6 (15.6)       | 28.3 (14.7)       | 30.0 (15.7)         | 31.9 (14.4)       | 31.1 (15.6)       |
| CRP                | 2.4 (2.9)         | 3.7 (4.2)         | 2.3 (2.9)           | 3.3 (3.8)         | 2.6 (3.0)         | 2.2 (2.5)         | 2.6 (3.8)           | 3.0 (3.3)         | 3.2 (3.8)         |

1  
2  
3  
4  
5 CRP, C-reactive protein; DAS28 , Disease Activity Score using 28 joints; DMARD, disease-modifying antirheumatic drug; HAQ,  
6  
7 Health Assessment Questionnaire; IR, inadequate responder; MTX, methotrexate; RA, rheumatoid arthritis; RF, rheumatoid factor;  
8  
9 SJC, swollen joint count; TCZ, tocilizumab; TJC, tender joint count; aTNF, anti-tumour necrosis factor.  
10  
11 Values with numbers in parentheses are mean (SD).  
12  
13  
14  
15  
16  
17  
18  
19  
20  
21  
22  
23  
24  
25  
26  
27  
28  
29  
30  
31  
32  
33  
34  
35  
36  
37  
38  
39  
40  
41  
42  
43  
44  
45  
46  
47  
48  
49

**Table 2.** Summary of markers investigated. For the DNA markers, SNPs in IL-6 and IL-6R are considered tier 1, IL-6 network genes are considered tier 2, and IL-6 pathway genes are considered tier 3

| Sample type      | Target gene        | Analytes, n          | Assay (manufacturer)                                                   |
|------------------|--------------------|----------------------|------------------------------------------------------------------------|
| <b>Primary</b>   |                    |                      |                                                                        |
| DNA              | <i>IL-6</i>        | 10 SNPs              | Bead-Chip arrays HumanHap550k version 3.0, OPA custom array (Illumina) |
|                  | <i>IL-6R</i>       | 18 SNPs              |                                                                        |
| RNA              | <i>IL-6R</i>       | 3 probe sets         | GeneChip Human Genome U133 Plus 2.0 Array (Affymetrix)                 |
| Serum            | <i>IL-6</i>        | 1                    | Human IL-6 Immunoassay (Quantikine)                                    |
|                  | <i>sIL-6R</i>      | 1                    | Human sIL-6R Immunoassay (Quantikine)                                  |
| <b>Secondary</b> |                    |                      |                                                                        |
| DNA              | IL-6 network genes | 233 SNPs (22 genes)  | Bead-Chip arrays HumanHap550k version 3.0, OPA custom array (Illumina) |
|                  | IL-6 pathway genes | 1004 SNPs (67 genes) |                                                                        |
| RNA              | <i>IL-6ST</i>      | 7 probe sets         | GeneChip Human Genome U133 Plus 2.0 Array (Affymetrix)                 |

IL-6, interleukin 6; IL-6R, IL-6 receptor; IL-6ST, IL-6 signal transducer; sIL-6R, soluble IL-6R; SNP, single-nucleotide polymorphism.

**Table 3.** Association of markers with baseline disease activity. All results for serum markers are shown. For RNA, the probe sets within each gene were strongly correlated. One probe set each in IL-6R and IL-6ST is shown. For DNA, only associations with raw  $P < 0.01$  (tier 1) and FDR  $P < 0.05$  (tiers 2 and 3) were shown. FDR was calculated within the population (white or all) and within the tier

| Serum protein and RNA markers |         |            |         |                 |              |         |                 |                      |                     |
|-------------------------------|---------|------------|---------|-----------------|--------------|---------|-----------------|----------------------|---------------------|
|                               |         | Serum IL-6 |         |                 | Serum sIL-6R |         |                 | IL-6R<br>217489_s_at | IL-6ST<br>234967_at |
| End point                     |         | AMBITION   | RADIATE | Pooled DMARD-IR | AMBITION     | RADIATE | Pooled DMARD-IR | RADIATE              | RADIATE             |
| DAS28                         | n       | 480        | 322     | 2286            | 577          | 423     | 2620            | 217                  | 217                 |
|                               | $\beta$ | 0.209      | 0.257   | 0.201           | -0.007       | 0.075   | 0.054           | 0.109                | -0.04               |
|                               | $r^2$   | 0.051      | 0.072   | 0.044           | 0            | 0.006   | 0.003           | 0.013                | 0.002               |
|                               | p       | <0.0001    | <0.0001 | <0.0001         | 0.8478       | 0.1018  | 0.0044          | 0.09                 | 0.54                |
| TJC                           | n       | 481        | 327     | 2305            | 580          | 428     | 2642            | 217                  | 217                 |
|                               | $\beta$ | -0.186     | 1.455   | 0.138           | -0.154       | 1.28    | 0.054           | 0.27                 | 1.276               |
|                               | $r^2$   | 0          | 0.009   | 0               | 0            | 0.007   | 0               | 0                    | 0.007               |
|                               | p       | 0.7742     | 0.0938  | 0.6611          | 0.7967       | 0.0889  | 0.8558          | 0.79                 | 0.2140              |
| SJC                           | n       | 481        | 327     | 2305            | 580          | 428     | 2642            | 217                  | 217                 |
|                               | $\beta$ | 0.247      | 1.421   | 0.813           | -0.679       | -0.069  | 0.52            | -0.864               | 0.218               |
|                               | $r^2$   | 0          | 0.018   | 0.006           | 0.004        | 0       | 0.002           | 0.008                | 0                   |
|                               | p       | 0.6279     | 0.0158  | 0.0003          | 0.1424       | 0.8938  | 0.013           | 0.1950               | 0.7440              |
| ESR                           | n       | 481        | 327     | 2299            | 580          | 428     | 2635            | 217                  | 217                 |
|                               | $\beta$ | 0.19       | 0.172   | 0.151           | 0.039        | -0.003  | 0.023           | 0.164                | -0.132              |
|                               | $r^2$   | 0.088      | 0.091   | 0.055           | 0.004        | 0       | 0.001           | 0.082                | 0.053               |

|     |         |         |         |         |        |        |        |         |        |
|-----|---------|---------|---------|---------|--------|--------|--------|---------|--------|
|     | p       | <0.0001 | <0.0001 | <0.0001 | 0.132  | 0.9158 | 0.0672 | <0.0001 | 0.0007 |
| CRP | n       | 481     | 327     | 2305    | 580    | 428    | 2642   | 217     | 217    |
|     | $\beta$ | 0.363   | 0.429   | 0.35    | 0.007  | 0.019  | 0.019  | 0.228   | -0.145 |
|     | $r^2$   | 0.288   | 0.358   | 0.309   | 0      | 0.001  | 0.001  | 0.089   | 0.036  |
|     | p       | <0.0001 | <0.0001 | <0.0001 | 0.8103 | 0.5935 | 0.1242 | <0.0001 | 0.005  |
| HAQ | n       | 480     | 324     | 2165    | 579    | 425    | 2465   | 217     | 217    |
|     | $\beta$ | 0.085   | 0.145   | 0.084   | 0.002  | 0.074  | 0.024  | 0.048   | -0.103 |
|     | $r^2$   | 0.019   | 0.062   | 0.018   | 0      | 0.016  | 0.002  | 0.007   | 0.031  |
|     | p       | 0.0022  | <0.0001 | <0.0001 | 0.933  | 0.0089 | 0.0504 | 0.22    | 0.009  |

**DNA markers**

| Tier | Gene             | Chr | SNP        | Population | MAF  | End point | n   | $\beta$ | SE      | Raw P   | FDR P |
|------|------------------|-----|------------|------------|------|-----------|-----|---------|---------|---------|-------|
| 1    | <i>IL-6R</i>     | 1   | rs1386821  | White      | 0.17 | HAQ       | 708 | 0.135   | 0.041   | 0.001   | 0.18  |
|      |                  |     |            | All        | 0.15 | HAQ       | 845 | 0.118   | 0.040   | 0.004   | 0.52  |
|      | <i>TOLLIP</i>    | 11  | rs5743899  | All        | 0.22 | ESR       | 893 | 0.15    | 0.03449 | 1.5E-05 | 0.046 |
|      | <i>RUNX1</i>     | 21  | rs2252585  | All        | 0.32 | ESR       | 905 | 0.1209  | 0.02884 | 3.0E-05 | 0.046 |
| 3    | <i>IL-1RAPL1</i> | 23  | rs12559028 | All        | 0.49 | SJC       | 905 | 2.182   | 0.5349  | 4.9E-05 | 0.050 |
|      |                  |     |            | All        | 0.44 | SJC       | 905 | 2.27    | 0.5424  | 3.1E-05 | 0.046 |
|      |                  |     |            | All        | 0.38 | SJC       | 905 | 2.321   | 0.5592  | 3.6E-05 | 0.046 |
|      |                  |     |            | All        | 0.45 | ESR       | 897 | 0.1181  | 0.02853 | 3.8E-05 | 0.046 |

$\beta$ , regression coefficient, representing the difference in the end point corresponding to standard deviation in marker value; Chr, chromosome; CRP, C-reactive protein; DAS28, Disease Activity Score using 28 joints; DMARD, disease-modifying antirheumatic drug; ESR, erythrocyte sedimentation rate; HAQ, Health Assessment Questionnaire; IL-6ST, IL-6 signal transducer; IR, inadequate responder; MAF, minor allele frequency; MTX, methotrexate; SJC, swollen joint count; TCZ, tocilizumab; TJC, tender joint count.

**Table 4.** Association of baseline markers with treatment response measured by change in DAS28 from baseline at week 16. Baseline DAS28 and TCZ dose were included in the model as covariates. FDR was calculated within the white or all population and within the tier

| All association results for primary DNA markers |            |                   |      |         |      |       |                     |      |         |      |        |
|-------------------------------------------------|------------|-------------------|------|---------|------|-------|---------------------|------|---------|------|--------|
| Gene                                            | SNP        | All DMARD-IR, TCZ |      |         |      |       | White DMARD-IR, TCZ |      |         |      |        |
|                                                 |            | MAF               | n    | $\beta$ | SE   | Raw P | MAF                 | n    | $\beta$ | SE   | Raw P  |
| <i>IL-6</i>                                     | rs12700386 | 0.19              | 583  | 0.22    | 0.11 | 0.049 | 0.18                | 468  | 0.16    | 0.13 | 0.20   |
|                                                 | rs2069833  | 0.35              | 584  | -0.08   | 0.08 | 0.34  | 0.42                | 469  | -0.13   | 0.09 | 0.18   |
|                                                 | rs2069837  | 0.08              | 586  | -0.11   | 0.15 | 0.44  | 0.08                | 471  | -0.05   | 0.16 | 0.75   |
|                                                 | rs2066992  | 0.12              | 586  | -0.09   | 0.12 | 0.49  | 0.06                | 471  | -0.11   | 0.21 | 0.61   |
|                                                 | rs2069840  | 0.32              | 584  | 0.24    | 0.09 | 0.007 | 0.33                | 469  | 0.30    | 0.10 | 0.0026 |
|                                                 | rs1554606  | 0.4               | 586  | -0.10   | 0.08 | 0.23  | 0.45                | 471  | -0.15   | 0.09 | 0.12   |
|                                                 | rs2069845  | 0.4               | 583  | -0.10   | 0.08 | 0.23  | 0.45                | 468  | -0.15   | 0.09 | 0.12   |
|                                                 | rs2069861  | 0.07              | 584  | -0.10   | 0.15 | 0.53  | 0.08                | 469  | -0.11   | 0.16 | 0.50   |
|                                                 | rs10242595 | 0.36              | 586  | -0.02   | 0.08 | 0.86  | 0.32                | 471  | -0.02   | 0.10 | 0.80   |
| rs11766273                                      | 0.07       | 586               | 0.10 | 0.16    | 0.53 | 0.08  | 471                 | 0.05 | 0.17    | 0.75 |        |
| <i>IL-6R</i>                                    | rs1386821  | 0.15              | 586  | 0.02    | 0.12 | 0.87  | 0.17                | 471  | 0.06    | 0.13 | 0.67   |
|                                                 | rs4075015  | 0.39              | 584  | -0.06   | 0.09 | 0.50  | 0.41                | 469  | -0.07   | 0.10 | 0.46   |
|                                                 | rs6684439  | 0.41              | 586  | 0.03    | 0.08 | 0.76  | 0.39                | 471  | 0.06    | 0.10 | 0.55   |
|                                                 | rs4845618  | 0.43              | 582  | 0.03    | 0.08 | 0.74  | 0.44                | 467  | 0.00    | 0.09 | 0.99   |
|                                                 | rs8192282  | 0.15              | 581  | -0.09   | 0.12 | 0.46  | 0.16                | 468  | -0.08   | 0.13 | 0.53   |
|                                                 | rs7549250  | 0.43              | 575  | 0.07    | 0.08 | 0.43  | 0.44                | 462  | 0.02    | 0.09 | 0.81   |
|                                                 | rs4553185  | 0.43              | 586  | 0.04    | 0.08 | 0.60  | 0.44                | 471  | 0.01    | 0.09 | 0.90   |
|                                                 | rs4845623  | 0.44              | 586  | -0.01   | 0.08 | 0.92  | 0.41                | 471  | 0.01    | 0.10 | 0.89   |



|            |      |     |       |      |      |      |     |       |      |      |
|------------|------|-----|-------|------|------|------|-----|-------|------|------|
| rs4537545  | 0.44 | 586 | -0.04 | 0.08 | 0.60 | 0.41 | 471 | -0.01 | 0.10 | 0.93 |
| rs4129267  | 0.41 | 586 | -0.02 | 0.08 | 0.77 | 0.4  | 471 | 0.02  | 0.10 | 0.87 |
| rs8192284  | 0.41 | 582 | -0.03 | 0.08 | 0.76 | 0.4  | 467 | 0.02  | 0.10 | 0.87 |
| rs11265618 | 0.17 | 586 | -0.05 | 0.11 | 0.64 | 0.17 | 471 | -0.04 | 0.13 | 0.73 |
| rs4329505  | 0.16 | 582 | -0.03 | 0.11 | 0.81 | 0.16 | 467 | -0.02 | 0.13 | 0.87 |
| rs4240872  | 0.24 | 586 | 0.03  | 0.10 | 0.79 | 0.23 | 471 | -0.01 | 0.11 | 0.93 |
| rs4509570  | 0.24 | 580 | 0.02  | 0.10 | 0.85 | 0.23 | 466 | -0.02 | 0.11 | 0.83 |
| rs2229238  | 0.19 | 584 | -0.03 | 0.11 | 0.75 | 0.19 | 469 | 0.00  | 0.12 | 0.98 |
| rs7514452  | 0.19 | 586 | -0.03 | 0.11 | 0.77 | 0.19 | 471 | 0.00  | 0.12 | 0.98 |
| rs7526293  | 0.2  | 584 | -0.04 | 0.10 | 0.71 | 0.2  | 469 | -0.03 | 0.12 | 0.79 |

**DNA markers analyzed in the pooled DMARD-IR population with an FDR\* of <0.1**

| Tier | Gene         | SNP       | Population | MAF  | n   | $\beta$ | SE   | RAW P   | FDR P |
|------|--------------|-----------|------------|------|-----|---------|------|---------|-------|
| 1    | <i>IL-6</i>  | rs2069840 | White      | 0.33 | 469 | 0.30    | 0.10 | 0.0026  | 0.073 |
| 3    | <i>PTPN2</i> | rs973767  | All        | 0.14 | 586 | 0.48    | 0.12 | 7.2E-05 | 0.072 |
|      |              |           | White      | 0.16 | 471 | 0.53    | 0.13 | 5.7E-05 | 0.057 |

$\beta$ , regression coefficient, representing the difference in DAS28 corresponding to each SD in marker value; DAS28, Disease Activity Score using 28 joints; DMARD, disease-modifying antirheumatic drug; FDR, false discovery rate; IL-6, interleukin-6; IL-6R, IL-6 receptor; IR, inadequate responder; MAF, minor allele frequency; SNP, single nucleotide polymorphism; TCZ, tocilizumab.

## FIGURE

**Figure 1.** Serum IL-6 concentration association with response to TCZ. Forest plots show the effect and 95% CI for the association of IL-6 with cDAS28 at 16 weeks across treatment lines. cDAS28, change in DAS28 from baseline at week 16; CI, confidence interval; DMARD, disease-modifying antirheumatic drug; IR, inadequate responder; MTX, methotrexate; SD, standard deviation; TCZ, tocilizumab; TNF, tumour necrosis factor. ●, MTX/DMARD; ●, TCZ+MTX/DMARD.

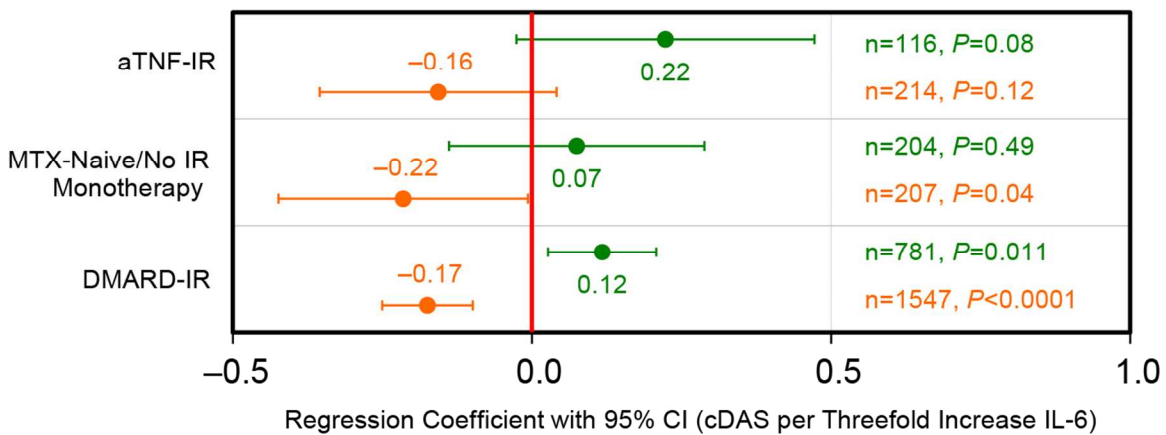

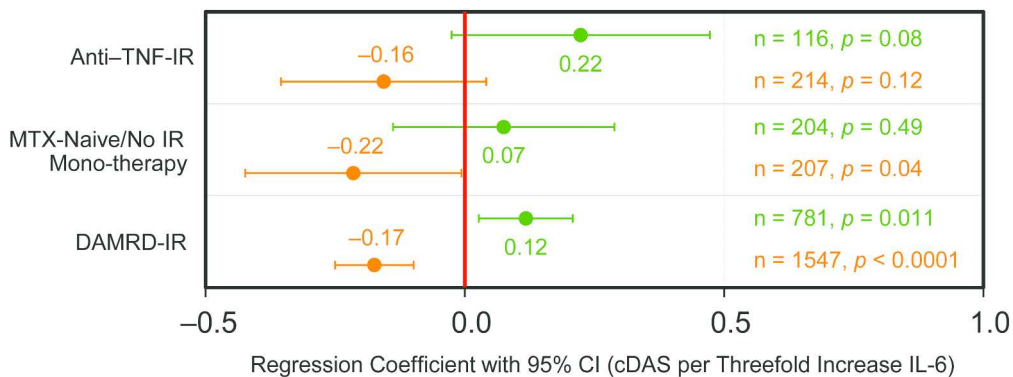

238x132mm (300 x 300 DPI)

review only

1  
2  
3  
4  
5  
6  
7  
8  
9  
10  
11  
12  
13  
14  
15  
16  
17  
18  
19  
20  
21  
22  
23  
24  
25  
26  
27  
28  
29  
30  
31  
32  
33  
34  
35  
36  
37  
38  
39  
40  
41  
42  
43  
44  
45  
46  
47  
48  
49  
50  
51  
52  
53  
54  
55  
56  
57  
58  
59  
60

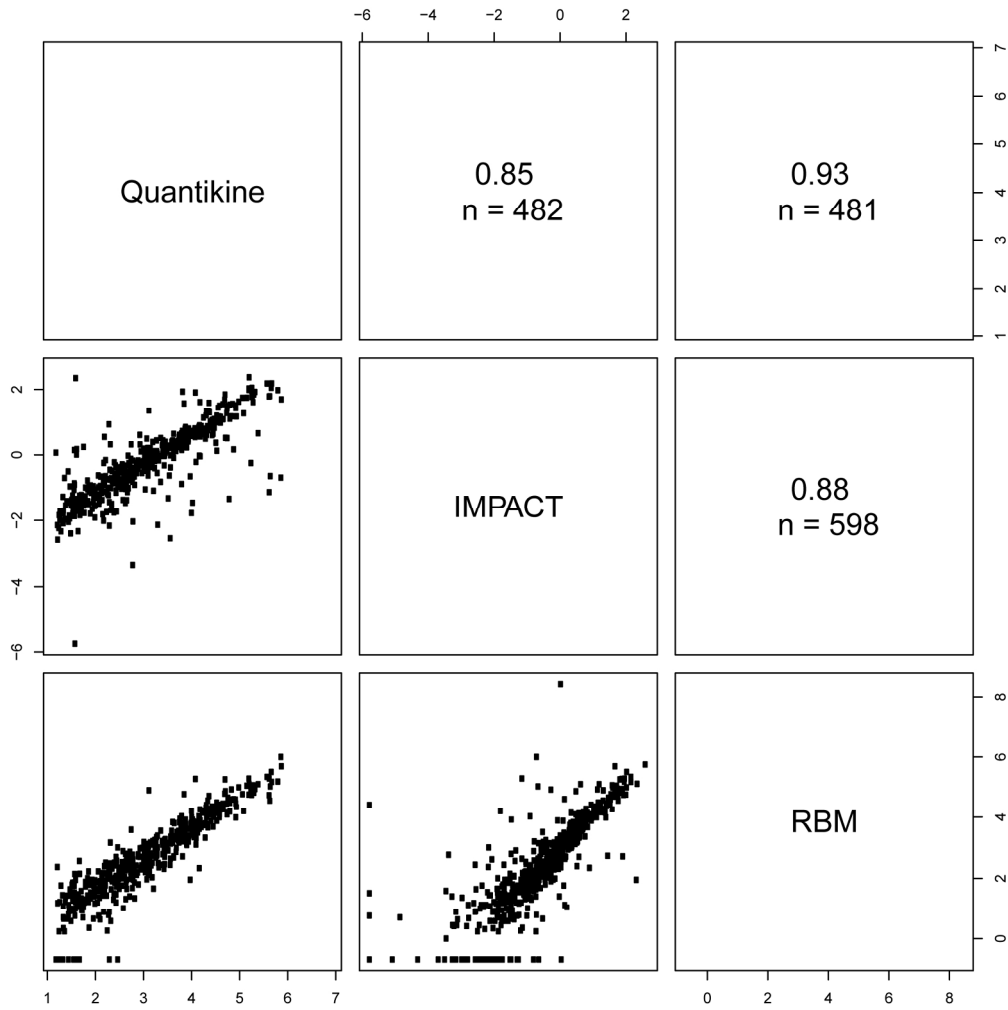

186x186mm (300 x 300 DPI)

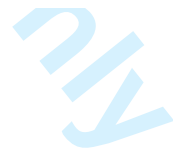

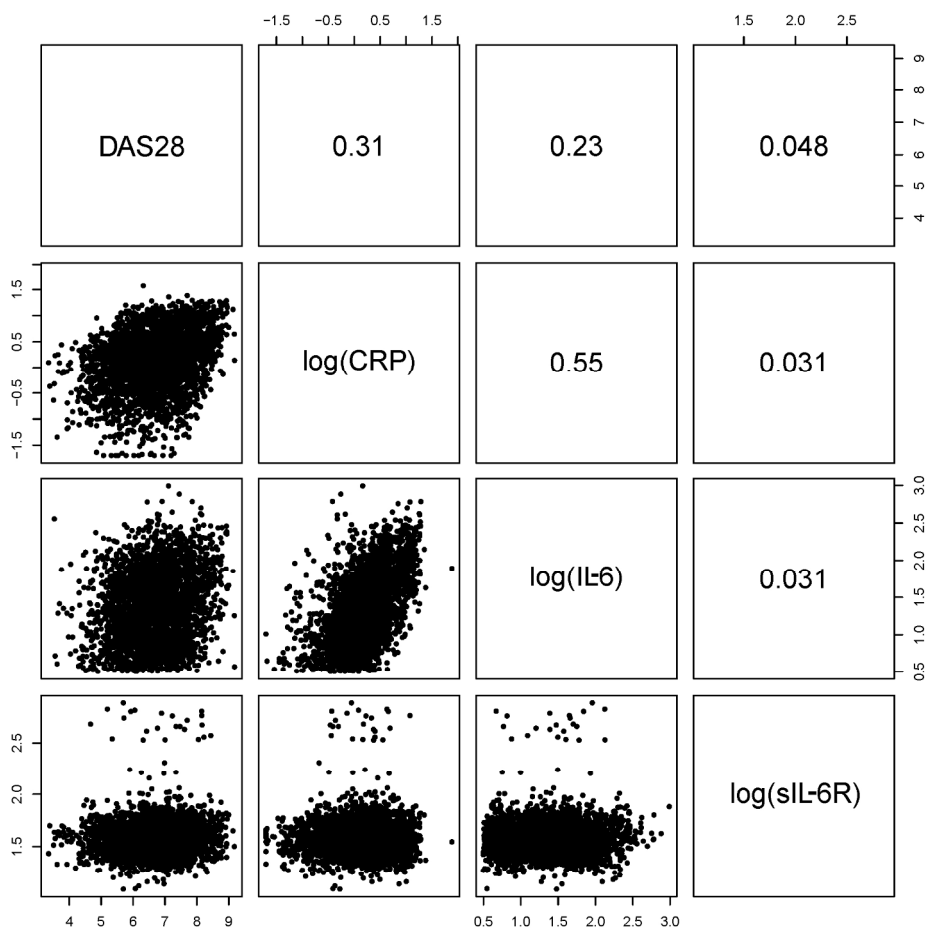

203x203mm (300 x 300 DPI)

1  
2  
3  
4  
5  
6  
7  
8  
9  
10  
11  
12  
13  
14  
15  
16  
17  
18  
19  
20  
21  
22  
23  
24  
25  
26  
27  
28  
29  
30  
31  
32  
33  
34  
35  
36  
37  
38  
39  
40  
41  
42  
43  
44  
45  
46  
47  
48  
49  
50  
51  
52  
53  
54  
55  
56  
57  
58  
59  
60

1  
2  
3  
4  
5  
6  
7  
8  
9  
10  
11  
12  
13  
14  
15  
16  
17  
18  
19  
20  
21  
22  
23  
24  
25  
26  
27  
28  
29  
30  
31  
32  
33  
34  
35  
36  
37  
38  
39  
40  
41  
42  
43  
44  
45  
46  
47  
48  
49  
50  
51  
52  
53  
54  
55  
56  
57  
58  
59  
60

**Change in DAS28 score at week 16 versus baseline**  
Study: WA18063 Treatment: TCZ 8 mg/kg

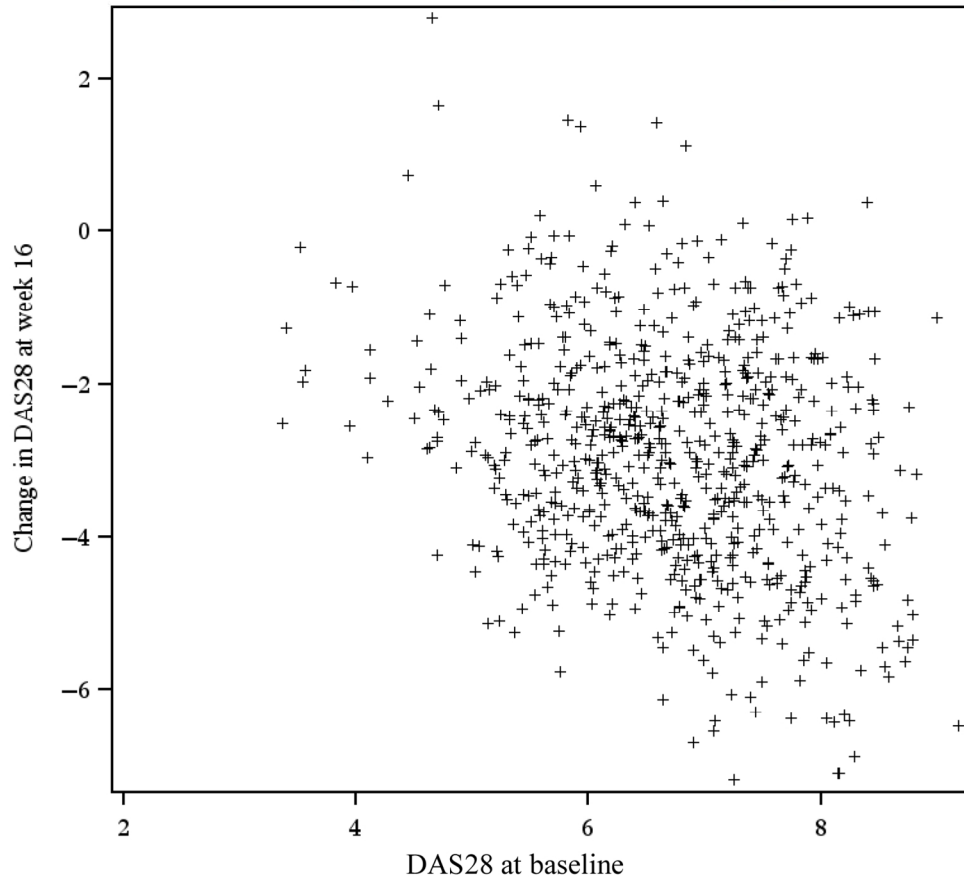

133x134mm (300 x 300 DPI)

## SUPPLEMENTARY MATERIAL

### SNPs investigated on IL-6 network-associated genes

Tier 2 SNPs include 233 polymorphisms within 22 genes: *ADAM10*, *ADAM17*, *CEBPB*, *CEBPD*, *IL6ST*, *JAK1*, *MAP2K1*, *MAP2K2*, *MAPK1*, *MAPK3*, *NFKB1*, *NFKB2*, *NR3C1*, *PTPN11*, *RAF1*, *REL*, *RELA*, *RELB*, *SOCS3*, *SOS1*, *SOS2*, and *STAT3*. Tier 3 SNPs include 1005 polymorphisms in 67 genes: *TNFRSF4*, *MTHFR*, *IL10*, *ATF3*, *IL1R2*, *IL1R1*, *IL1RL2*, *IL1RL1*, *IL1F9*, *IL1RN*, *STAT1*, *CTLA4*, *FN1*, *IRAK2*, *MYD88*, *CD86*, *IL1RAP*, *TLR1*, *RFC1*, *SPP1*, *TLR2*, *PIK3R1*, *IRF1*, *IL4*, *EGR1*, *TNF*, *MAPK14*, *NFKBIE*, *IRAK1BP1*, *MAP3K7*, *IFNGR1*, *ESR1*, *RAC1*, *TRIP6*, *IRF5*, *IKBKB*, *MYC*, *TLR4*, *CHUK*, *TOLLIP*, *TRAF6*, *RELT*, *IL10RA*, *TIRAP*, *STAT6*, *IRAK3*, *NFKBIA*, *SOCS1*, *UBB*, *NOS2*, *STAT5A*, *MAP3K14*, *TYMS*, *PTPN2*, *BCL2*, *ELAVL1*, *TYK2*, *PIK3R2*, *NFKBIB*, *BCL2L1*, *IL10RB*, *IFNGR2*, *RUNX1*, *IL1RAPL1*, *BTK*, *IRAK1*, and *IKBKG*. The polymorphism IDs are available from the corresponding author upon request.

### Method for genotyping data QC

Before genotyping, a Y-chromosome test assay was performed for all samples. Sex results of this assay were compared with clinical data, and only samples with concordance in sex assignment were selected for genotyping. DNA samples genotyped using the Illumina standard arrays or custom arrays and with call rates <99% or <95%, respectively, were re-genotyped. Re-assayed samples with call rates consistently below the threshold were removed from the analysis. Sample pairs with kinship coefficient  $\geq 0.5$  were excluded. Markers with call rates <95% were individually reviewed and re-clustered. The quality of markers with call rates  $\geq 95\%$  was assessed using Infinium genotyping QC metrics (Illumina). Single-nucleotide polymorphisms (SNPs) with either >5% missing data or with a minor allele frequency <1% were excluded from the analysis. Chi-square tests of Hardy-Weinberg equilibrium were conducted in white patients; the results were used, along with estimates of minor allele frequency, to assist in the interpretation of associations.

### Method for gene expression data QC

Quality control metrics on MAS5 normalized data, box plots, MvA plots, and principal component analyses were performed using the Bioconductor QC method; 11 chips were identified as having poor quality. Five samples were further excluded because of missing Disease Activity Score using 28 joints (DAS28) erythrocyte sedimentation rate (ESR) data at baseline or week 16.

1  
2  
3  
4  
5  
6  
7  
8  
9  
10  
11  
12  
13  
14  
15  
16  
17  
18  
19  
20  
21  
22  
23  
24  
25  
26  
27  
28  
29  
30  
31  
32  
33  
34  
35  
36  
37  
38  
39  
40  
41  
42  
43  
44  
45  
46  
47  
48  
49

**Supplementary Table 1.** SNPs on IL-6 and IL-6R SNPs in the primary analysis and the pair-wise linkage disequilibrium coefficient ( $R^2$ ) based on data from HapMap22.

| Gene: IL6, Chromosome 7 |            |               | Pair-wise $R^2$ |           |           |           |           |           |           |           |            |
|-------------------------|------------|---------------|-----------------|-----------|-----------|-----------|-----------|-----------|-----------|-----------|------------|
| SNP ID                  | Position   | Function      | rs1270038       | rs2069833 | rs2069837 | rs2066992 | rs2069840 | rs1554606 | rs2069845 | rs2069861 | rs10242595 |
| rs12700386              | 22,729,534 | 5' upstream   |                 |           |           |           |           |           |           |           |            |
| rs2069833               | 22,734,189 | Intronic      | 0.134           |           |           |           |           |           |           |           |            |
| rs2069837               | 22,734,552 | Intronic      | 0.021           | 0.079     |           |           |           |           |           |           |            |
| rs2066992               | 22,734,774 | Intronic      | 0.013           | 0.048     | 0.003     |           |           |           |           |           |            |
| rs2069840               | 22,735,097 | Intronic      | 0.333           | 0.512     | 0.033     | 0.02      |           |           |           |           |            |
| rs1554606               | 22,735,232 | Intronic      | 0.149           | 0.935     | 0.084     | 0.051     | 0.548     |           |           |           |            |
| rs2069845               | 22,736,674 | Intronic      | 0.149           | 0.935     | 0.084     | 0.051     | 0.548     | 1         |           |           |            |
| rs2069861               | 22,738,179 | 3' downstream | 0.021           | 0.065     | 0.005     | 0.003     | 0.033     | 0.06      | 0.06      |           |            |
| rs10242595              | 22,740,756 | 3' downstream |                 | 0.146     | 0.235     | 0.143     | 0.006     | 0.162     | 0.162     | 0.022     |            |
| rs11766273              | 22,742,188 | 3' downstream |                 | 0.11      | 0.009     | 0.005     | 0.056     | 0.103     | 0.103     | 0.009     | 0.037      |

| Gene IL-6R, Chromosome 1 |             |          | Pair-wise $R^2$ |           |           |           |           |           |           |           |           |           |           |           |           |           |           |         |
|--------------------------|-------------|----------|-----------------|-----------|-----------|-----------|-----------|-----------|-----------|-----------|-----------|-----------|-----------|-----------|-----------|-----------|-----------|---------|
| SNP ID                   | Position    | Function | rs1386821       | rs4075015 | rs6684439 | rs4845618 | rs8192282 | rs7549250 | rs4553185 | rs4845623 | rs4537545 | rs4129267 | rs8192284 | rs1126561 | rs4329505 | rs4240872 | rs4509570 | rs22292 |
| rs1386821                | 152,648,673 | Intronic |                 |           |           |           |           |           |           |           |           |           |           |           |           |           |           |         |
| rs4075015                | 152,655,820 | Intronic | 0.169           |           |           |           |           |           |           |           |           |           |           |           |           |           |           |         |
| rs6684439                | 152,662,463 | Intronic | 0.012           | 0.04      |           |           |           |           |           |           |           |           |           |           |           |           |           |         |
| rs4845618                | 152,666,639 | Intronic | 0.003           | 0.028     | 0.033     |           |           |           |           |           |           |           |           |           |           |           |           |         |
| rs8192282                | 152,668,303 | Intronic | 0.008           | 0.011     | 0.013     | 0.219     |           |           |           |           |           |           |           |           |           |           |           |         |
| rs7549250                | 152,670,960 | Intronic | 0.001           | 0.013     | 0.029     | 0.905     | 0.198     |           |           |           |           |           |           |           |           |           |           |         |
| rs4553185                | 152,677,579 | Intronic | 0.001           | 0.013     | 0.029     | 0.905     | 0.198     | 1         |           |           |           |           |           |           |           |           |           |         |
| rs4845623                | 152,682,401 | Intronic | 0.009           | 0.048     | 0.07      | 0.411     | 0.085     | 0.504     | 0.504     |           |           |           |           |           |           |           |           |         |
| rs4537545                | 152,685,503 | Intronic | 0.003           | 0.042     | 0.073     | 0.393     | 0.082     | 0.486     | 0.486     | 0.964     |           |           |           |           |           |           |           |         |



|            |             |                  |       |       |       |       |       |       |       |       |       |       |       |       |       |       |       |     |  |
|------------|-------------|------------------|-------|-------|-------|-------|-------|-------|-------|-------|-------|-------|-------|-------|-------|-------|-------|-----|--|
| rs4129267  | 152,692,888 | Intronic         | 0.003 | 0.042 | 0.073 | 0.393 | 0.082 | 0.486 | 0.486 | 0.964 | 1     |       |       |       |       |       |       |     |  |
| rs8192284  | 152,693,594 | Intronic         | 0.002 | 0.034 | 0.07  | 0.368 | 0.085 | 0.455 | 0.455 | 0.928 | 0.964 | 0.964 |       |       |       |       |       |     |  |
| rs11265618 | 152,696,716 | Intronic         | 0.005 | 0.011 | 0.012 | 0.194 | 0.887 | 0.176 | 0.176 | 0.101 | 0.098 | 0.098 | 0.101 |       |       |       |       |     |  |
| rs4329505  | 152,699,044 | Intronic         | 0.005 | 0.011 | 0.012 | 0.194 | 0.887 | 0.176 | 0.176 | 0.101 | 0.098 | 0.098 | 0.101 | 1     |       |       |       |     |  |
| rs4240872  | 152,702,819 | Intronic         | 0.043 | 0.095 | 0.009 | 0.316 | 0.071 | 0.356 | 0.356 | 0.18  | 0.205 | 0.205 | 0.18  | 0.087 | 0.087 |       |       |     |  |
| rs4509570  | 152,703,008 | Intronic         | 0.043 | 0.095 | 0.009 | 0.316 | 0.071 | 0.356 | 0.356 | 0.18  | 0.205 | 0.205 | 0.18  | 0.087 | 0.087 | 1     |       |     |  |
| rs2229238  | 152,704,520 | 3' UTR           | 0.026 | 0.034 | 0.004 | 0.254 | 0.074 | 0.285 | 0.285 | 0.125 | 0.148 | 0.148 | 0.155 | 0.066 | 0.066 | 0.752 | 0.752 |     |  |
| rs7514452  | 152,704,708 | 3' UTR           | 0.028 | 0.027 | 0.005 | 0.23  | 0.077 | 0.26  | 0.26  | 0.105 | 0.126 | 0.126 | 0.132 | 0.068 | 0.068 | 0.715 | 0.715 | 0.9 |  |
| rs7526293  | 152,710,833 | 3'<br>downstream | 0.022 | 0.021 | 0.003 | 0.228 | 0.068 | 0.256 | 0.256 | 0.111 | 0.134 | 0.134 | 0.139 | 0.06  | 0.06  | 0.688 | 0.688 | 0.9 |  |

IL-6=interleukin-6; IL-6R=IL-6 receptor; SNP=single nucleotide polymorphism.

**Supplementary Table 2.** Association of baseline markers with treatment response measured by change in DAS28 from baseline at week 16.

| Serum protein markers |             |                 |         |                |                |         |         |
|-----------------------|-------------|-----------------|---------|----------------|----------------|---------|---------|
|                       |             | Pooled DMARD-IR |         | AMBITION       |                | RADIATE |         |
|                       |             | TCZ             | Placebo | TCZ            | Placebo        | TCZ     | Placebo |
| IL-6                  | n           | 1547            | 781     | 207            | 204            | 214     | 116     |
|                       | $\beta$     | -0.17           | 0.12    | -0.22          | 0.07           | -0.16   | 0.22    |
|                       | SE          | 0.04            | 0.05    | 0.11           | 0.11           | 0.10    | 0.13    |
|                       | p           | <0.0001         | 0.011   | 0.04           | 0.49           | 0.12    | 0.08    |
| sIL-6R                | n           | 1772            | 897     | 247            | 250            | 287     | 144     |
|                       | $\beta$     | 0.04            | 0.01    | 0.03           | -0.01          | 0.11    | -0.04   |
|                       | SE          | 0.03            | 0.05    | 0.13           | 0.14           | 0.11    | 0.14    |
|                       | p           | 0.19            | 0.77    | 0.80           | 0.97           | 0.32    | 0.76    |
| Primary RNA markers   |             |                 |         |                |                |         |         |
| Gene                  | Probe set   |                 |         |                | RADIATE        |         |         |
|                       |             |                 |         | TCZ<br>8 mg/kg | TCZ<br>4 mg/kg | Placebo |         |
| <i>IL-6R</i>          | 205945_at   | n               |         |                | 76             | 75      | 66      |
|                       |             | $\beta$         |         |                | -0.1           | 0.06    | -0.03   |
|                       |             | SE              |         |                | 0.17           | 0.15    | 0.17    |
|                       |             | p               |         |                | 0.53           | 0.68    | 0.86    |
|                       | 217489_s_at | n               |         |                | 76             | 75      | 66      |
|                       |             | $\beta$         |         |                | -0.14          | 0.06    | 0.09    |
|                       |             | SE              |         |                | 0.19           | 0.14    | 0.14    |
|                       |             | p               |         |                | 0.47           | 0.68    | 0.53    |
| 226333_at             | n           |                 |         | 76             | 75             | 66      |         |
|                       | $\beta$     |                 |         | 0.03           | 0.11           | 0.28    |         |
|                       | SE          |                 |         | 0.19           | 0.12           | 0.17    |         |
|                       | p           |                 |         | 0.87           | 0.39           | 0.12    |         |

$\beta$ =regression coefficient, representing the difference in DAS28 corresponding to each copy of minor allele; DAS28=Disease Activity Score using 28 joints; DMARD=disease-modifying anti-rheumatic drug; IL-6R=interleukin-6 receptor; IL-6ST=IL-6 signal transducer; IR=inadequate responder; sIL-6R=soluble IL-6R; TCZ=tocilizumab.

Baseline DAS28 and TCZ dose were included in the model as covariates. Among the seven-probe set in IL-6ST, no association was found. All estimated  $\beta$  values were <0.3

**Supplementary Figure 1.** Scatter plots showing correlations between the variables.  
 (A) Pair-wise scatter plot of the three serum IL-6 assays on baseline samples in the TOWARD study. Spearman rank correlation coefficient and sample size are shown in the upper panel.

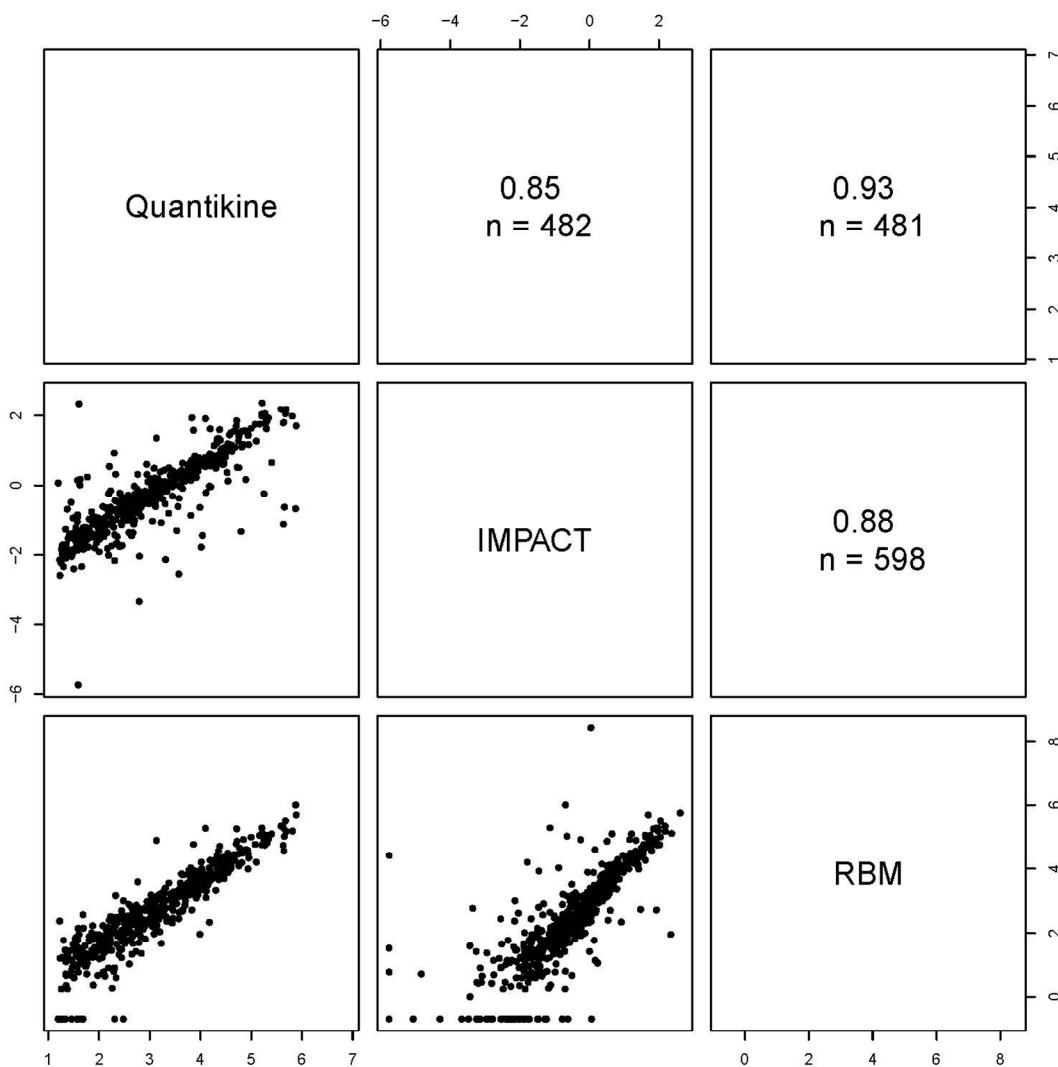

IL-6=interleukin-6; RBM=Rules-Based Medicine assay.

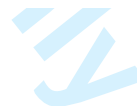

(B) Pair-wise scatter plots between DAS28, CRP, serum IL-6, and serum sIL-6R. Pearson correlation coefficients are labelled in the upper panel.

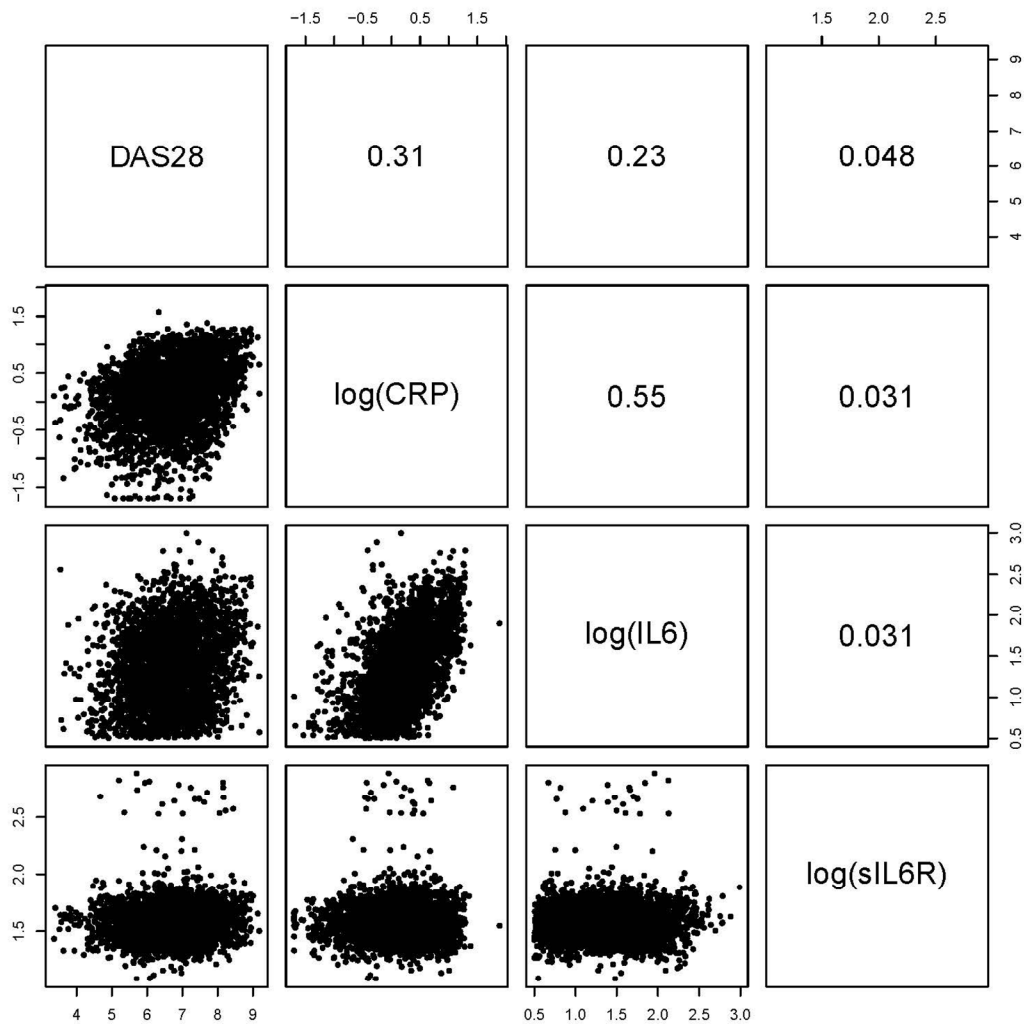

CRP=C-reactive protein; DAS28=Disease Activity Score at 28 joints; IL-6=interleukin-6; IL-6R=interleukin-6 receptor; sIL-6R=soluble interleukin-6 receptor.

(C) Scatter plot of change in DAS at week 16 versus baseline in tocilizumab-treated patients in the TOWARD study.

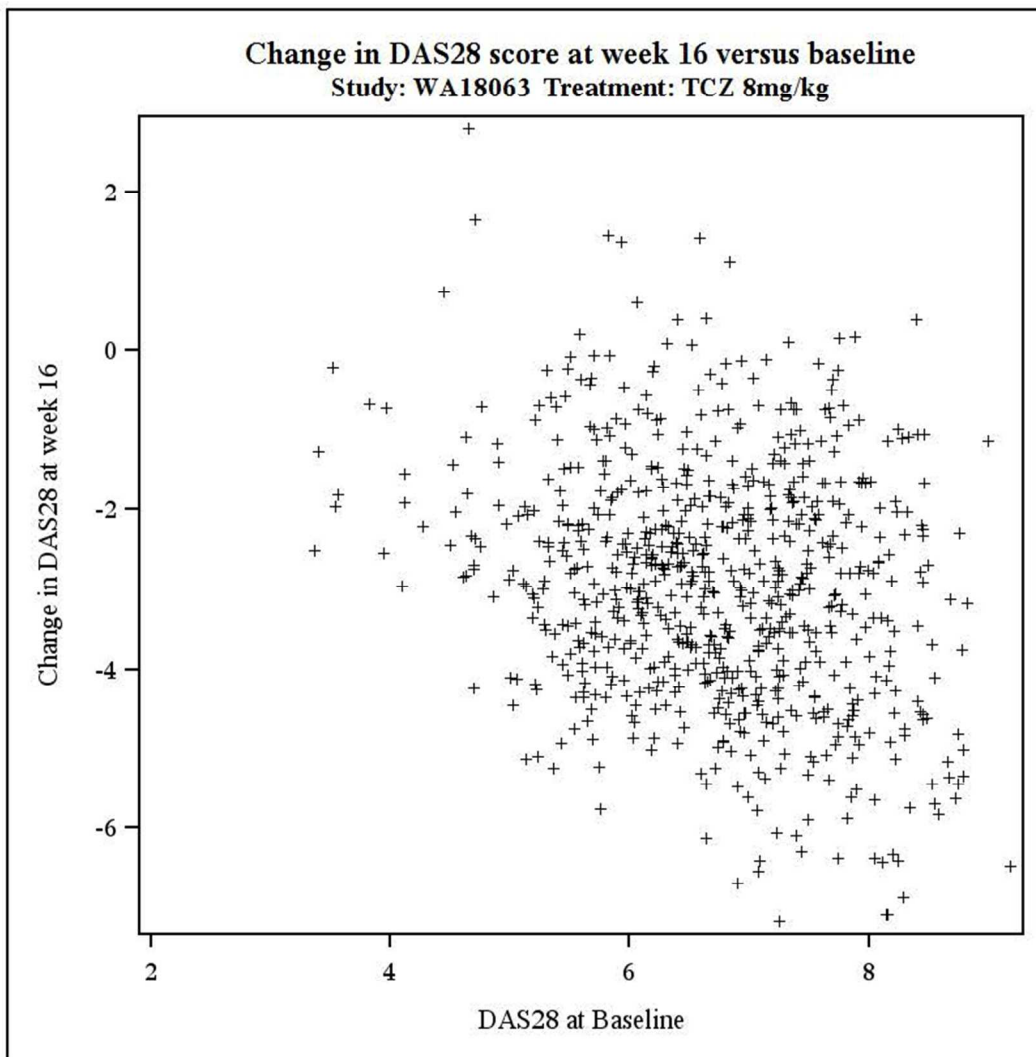

DAS=Disease Activity Score; DAS28=Disease Activity Score at 28 joints.

Only

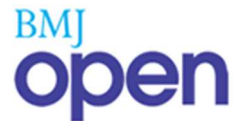

**IL-6 pathway-driven investigation of response to IL-6 receptor inhibition in rheumatoid arthritis**

|                                 |                                                                                                                                                                                                                                                                                                                                                                                                                                                     |
|---------------------------------|-----------------------------------------------------------------------------------------------------------------------------------------------------------------------------------------------------------------------------------------------------------------------------------------------------------------------------------------------------------------------------------------------------------------------------------------------------|
| Journal:                        | <i>BMJ Open</i>                                                                                                                                                                                                                                                                                                                                                                                                                                     |
| Manuscript ID:                  | bmjopen-2013-003199.R1                                                                                                                                                                                                                                                                                                                                                                                                                              |
| Article Type:                   | Research                                                                                                                                                                                                                                                                                                                                                                                                                                            |
| Date Submitted by the Author:   | 16-Jul-2013                                                                                                                                                                                                                                                                                                                                                                                                                                         |
| Complete List of Authors:       | Wang, Jianmei; Roche, Roche Products Limited<br>Platt, Adam; Roche, Roche Products Limited<br>Upmanyu, Ruchi; Roche, Roche Products Limited<br>Germer, Søren; Roche,<br>Lei, Guiyuan; Roche, Roche Products Limited<br>Rabe, Christina; Roche Diagnostics,<br>Benayed, Ryma; Roche,<br>Kenwright, Andy; Roche, Roche Products Limited<br>Hemmings, Andrew; Genentech,<br>Martin, Mitchell; Roche,<br>Harari, Olivier; Roche, Roche Products Limited |
| <b>Primary Subject Heading</b>: | Rheumatology                                                                                                                                                                                                                                                                                                                                                                                                                                        |
| Secondary Subject Heading:      | Immunology (including allergy)                                                                                                                                                                                                                                                                                                                                                                                                                      |
| Keywords:                       | RHEUMATOLOGY, IMMUNOLOGY, Rheumatology < INTERNAL MEDICINE                                                                                                                                                                                                                                                                                                                                                                                          |
|                                 |                                                                                                                                                                                                                                                                                                                                                                                                                                                     |

SCHOLARONE™  
Manuscripts

only

1  
2  
3  
4  
5 **IL-6 pathway–driven investigation of response to IL-6 receptor inhibition in**  
6  
7 **rheumatoid arthritis**  
8  
9

10  
11 Jianmei Wang, PhD,<sup>1\*</sup> Adam Platt, PhD,<sup>1,\*</sup> Ruchi Upmanyu, MSc,<sup>1</sup> Søren Germer, PhD,<sup>2</sup>  
12  
13 Guiyuan Lei, PhD,<sup>1</sup> Christina Rabe, PhD,<sup>3</sup> Ryma Benayed, PhD,<sup>2</sup> Andy Kenwright, BA,<sup>1</sup>  
14  
15 Andrew Hemmings, BA,<sup>4</sup> Mitchell Martin, PhD<sup>2</sup> and Olivier Harari, MD, PhD<sup>1</sup>  
16  
17  
18  
19

20  
21 <sup>1</sup>Roche Products Ltd, Welwyn Garden City, United Kingdom; <sup>2</sup>Roche, Nutley, New  
22  
23 Jersey, USA; <sup>3</sup>Roche Diagnostics GmbH, Penzberg, Germany; <sup>4</sup>Genentech (a member of  
24  
25 the Roche group), South San Francisco, California, USA  
26  
27  
28  
29

30  
31 \*These authors contributed equally to this work.  
32  
33  
34

35 **Correspondence to**

36  
37 Olivier Harari, MD  
38 Roche Products Ltd  
39 6 Falcon Way  
40 Welwyn Garden City, AL7 1TW, United Kingdom  
41 Telephone: +44 01707 366167  
42 Fax: 0044 1707 36 5887  
43 Email: olivier.harari@roche.com  
44  
45  
46  
47

48 **Running title:** IL-6 pathway and tocilizumab response  
49  
50  
51  
52  
53  
54  
55  
56  
57  
58  
59  
60

1  
2  
3 **Word count:** 3,496 (4,000 words maximum)  
4

5 **References:** 32  
6

7  
8 **Tables:** 4  
9

10 **Figures:** 1 (colour)  
11

12 **Supplementary material:** 2 tables, 3 figures  
13  
14  
15  
16  
17  
18  
19

20 **Keywords:** rheumatoid arthritis; tocilizumab; biomarkers  
21  
22  
23

24 **Primary subject heading:** Rheumatology  
25

26 **Secondary subject heading:** Immunology  
27  
28  
29  
30  
31  
32  
33

### 34 **Clinical Trials Information**

35  
36 Registration names and numbers of tocilizumab clinical trials on Clinicaltrials.gov are

37  
38 OPTION NCT00106548, TOWARD NCT00106574, RADIATE NCT00106522,

39  
40 AMBITION NCT00109408, LITHE NCT00106535 and MEASURE NCT00535782.  
41  
42  
43  
44  
45  
46  
47  
48  
49  
50  
51  
52  
53  
54  
55  
56  
57  
58  
59  
60



1  
2  
3 **ABSTRACT** (261 words; maximum, 300)  
4

5 **Objectives** To determine whether heterogeneity in interleukin-6 ( IL-6), IL-6 receptor  
6 and other components of the IL-6 signalling pathway/network, at the gene, transcript and  
7 protein levels, correlates with disease activity in patients with rheumatoid arthritis (RA)  
8 and with clinical response to tocilizumab.  
9

10 **Design** Biomarker samples and clinical data for five phase 3 trials of tocilizumab were  
11 analysed using serum (3,751 samples), genotype (927 samples) and transcript (217  
12 samples) analyses. Linear regression was then used to assess the association between  
13 these markers and either baseline disease activity or treatment response.  
14

15 **Results** Higher baseline serum IL-6 levels were significantly associated ( $P<0.0001$ ) with  
16 higher baseline DAS28, ESR, CRP and HAQ in patients who had inadequate responses to  
17 disease-modifying anti-rheumatic drugs (DMARD-IR), patients who had inadequate  
18 responses to anti-tumour necrosis factor (aTNF-IR) and patients who were  
19 naive/responders to MTX. Higher baseline serum IL-6 levels were also significantly  
20 associated with better clinical response to tocilizumab (versus placebo) measured by  
21 cDAS28 in the pooled DMARD-IR ( $P<0.0001$ ) and MTX-naive populations ( $P=0.04$ ).  
22 However, the association with treatment response was weak. A threefold difference in  
23 baseline IL-6 level corresponded to only a 0.17-unit difference in DAS28 at week 16. IL-  
24 6 pathway SNPs and RNA levels also were not strongly associated with treatment  
25 response.  
26  
27  
28  
29  
30  
31  
32  
33  
34  
35  
36  
37  
38  
39  
40  
41  
42  
43  
44  
45  
46  
47  
48  
49

50 **Conclusions** Our analyses illustrate that the biological activity of a disease-associated  
51 molecular pathway may impact the benefit of a therapy targeting that pathway. However,  
52 the variation in pathway activity, as measured in blood, may not be a strong predictor.  
53  
54  
55  
56  
57  
58  
59  
60

1  
2  
3 These data suggest that the major contribution to variability in clinical responsiveness to  
4 therapeutics in RA remains unknown.  
5  
6  
7

## 8 9 **Article Summary**

### 10 11 12 13 **Article focus**

- 14  
15 • This study aimed to determine whether genetic polymorphism and heterogeneity  
16  
17 in expression of IL-6 pathway/network components could explain the variability  
18  
19 in baseline disease activity and clinical response to tocilizumab in patients with  
20  
21 RA  
22  
23  
24

### 25 26 **Key messages**

- 27  
28 • Higher baseline serum IL-6 levels were significantly associated with higher  
29  
30 baseline disease activity (ESR, CRP, DAS28 and HAQ scores) in large  
31  
32 populations of methotrexate-naive, DMARD-IR and aTNF-IR patients with RA.  
33  
34 Higher baseline serum IL-6 levels also showed significant correlation with better  
35  
36 clinical response to tocilizumab (cDAS28) in DMARD-IR and MTX-naive RA  
37  
38 patients; however, the effect size was small, limiting the clinical usefulness of the  
39  
40 marker in predicting treatment benefit. A threefold higher baseline IL-6  
41  
42 concentration corresponded to only an additional 0.17-unit decrease in DAS28  
43  
44 score in the DMARD-IR patients treated with tocilizumab  
45  
46  
47
- 48  
49 • None of the genetic polymorphisms in IL-6 or IL-6R showed any association with  
50  
51 treatment response to tocilizumab  
52  
53
- 54  
55 • No strong predictor of tocilizumab treatment response was identified; thus, the  
56  
57 major factors underlying the patient-to-patient variability in clinical  
58  
59  
60

1  
2  
3 responsiveness to RA therapies remains unknown. This study illustrated well the  
4  
5 difficulty of identifying clinically useful predictive biomarkers in a complex  
6  
7 chronic disease  
8  
9

### 10 11 12 **Strengths and limitations of this study**

- 13  
14  
15 • This study included well-characterised RA patients from five large phase 3  
16  
17 controlled clinical trials. Biomarker data were available for more than 3,700  
18  
19 patients. The extensive collection of RNA, DNA and serum samples allowed  
20  
21 thorough investigation of the target-related heterogeneity  
22  
23
- 24  
25 • This is the first demonstration of a significant association between baseline serum  
26  
27 IL-6 levels and baseline disease activity in a large population of patients with RA,  
28  
29 extending earlier findings of elevated serum IL-6 levels in RA patients compared  
30  
31 with healthy controls  
32  
33
- 34  
35 • The current biomarker analysis is focused on clinical usefulness and included only  
36  
37 blood samples. Any potentially useful information about local regulation of IL-6  
38  
39 pathway gene transcription and protein level in tissues involved in RA could not  
40  
41 be obtained  
42  
43  
44  
45  
46  
47  
48  
49  
50  
51  
52  
53  
54  
55  
56  
57  
58  
59  
60

## INTRODUCTION

Interleukin-6 (IL-6) is a pleiotropic cytokine important in autoimmune diseases, including rheumatoid arthritis (RA).<sup>1</sup> High concentrations of IL-6 are found in the synovial fluid and sera of patients with RA. IL-6 involvement in RA pathogenesis includes involvement in B-cell proliferation and cytokine production, matrix metalloproteinase expression, acute-phase response and anaemia.<sup>2</sup>

IL-6 signal transduction occurs through either a classical (*cis*-) or a *trans*-signalling pathway. In *cis*-signalling, IL-6 binds to membrane-bound IL-6 receptor alpha (mIL-6R $\alpha$ ) before forming a trimer with gp130 (encoded by IL-6 signal transducer [*IL-6ST*]). A signalling complex is formed when this heterotrimer forms a dimer with another IL-6/mIL-6R/gp130 complex.<sup>1</sup> However, though gp130 is ubiquitously expressed, mIL-6R expression is restricted to hepatocytes and a subset of leukocytes. The *trans*-signalling pathway makes use of a soluble form of IL-6R (sIL-6R), to which IL-6 binds before forming a heterodimer with membrane-bound gp130, allowing cells that do not express mIL-6R to be activated by IL-6.<sup>1</sup>

Studies of tocilizumab,<sup>3-8</sup> a humanised monoclonal antibody targeted to IL-6R (membrane and soluble) that inhibits the interaction of IL-6 with its receptor, have shown meaningful amelioration of RA. However, the response is heterogeneous, consistent with the responses of other RA therapies. In a pooled analysis of patients who were inadequate responders to disease-modifying anti-rheumatic drug (DMARD-IR) in pivotal trials, 39% of those receiving 8 mg/kg tocilizumab for 24 weeks failed to achieve American College

1  
2  
3 of Rheumatology (ACR) 20 response (a 20% improvement), whereas 18% did achieve  
4  
5 ACR70 response (a 70% improvement). Therefore, there is great interest in discovering  
6  
7  
8 biomarkers to aid in physician decision-making by the accurate prediction of clinical  
9  
10 response in individual patients.  
11

12  
13  
14  
15 IL-6 and IL-6R levels vary in the sera of RA patients.<sup>9,10</sup> It has been suggested that some  
16  
17 of this heterogeneity is genetically determined. The rs8192284 A/C polymorphism is  
18  
19 found at the cleavage site of *mIL-6R* (Gln 357/Asp358) and has been associated with  
20  
21 increased sIL-6R levels and RA susceptibility,<sup>11,12</sup> whereas a polymorphism at -174 in  
22  
23 the promoter region of *IL-6* (rs1800795) affects transcription activity and, thus, serum  
24  
25 levels of IL-6.<sup>13</sup> Beyond RA, IL-6R polymorphisms that reduce cardiovascular risk<sup>14,15</sup>  
26  
27 attenuate classical IL-6 signalling by increasing the cleavage rate of mIL-6R (rs2228145  
28  
29 and rs8192284) and mirror the effects of tocilizumab on levels of IL-6 (increase), C-  
30  
31 reactive protein (CRP) and fibrinogen (decrease). In asthma, the rs4129267  
32  
33 polymorphism in IL-6R was found to be associated with increased risk, and Ferreira et  
34  
35 al<sup>16</sup> suggested that an IL-6R antagonist may show efficacy in asthma in a genotype-  
36  
37 dependent manner. The aim of this study was to determine whether baseline  
38  
39 heterogeneity in IL-6, IL-6R and other components of the IL-6 signalling  
40  
41 pathway/network, at the gene, transcript and protein levels, correlates with disease  
42  
43 activity in RA and clinical response to tocilizumab.  
44  
45  
46  
47  
48  
49  
50  
51  
52  
53  
54  
55  
56  
57  
58  
59  
60

## METHODS

### Patients and samples

Serum specimens used in this study were collected from five pivotal phase 3 studies of tocilizumab in patients with RA: RADIATE,<sup>4</sup> OPTION,<sup>3</sup> TOWARD,<sup>5</sup> AMBITION<sup>6</sup> and LITHE<sup>7</sup> (Table 1). At baseline, serum samples were taken pre-dose and at fasting per protocol, resulting in the vast majority of them collected in the morning. The distribution of the sampling times is shown in Supplementary Figure 2. DNA samples were from RADIATE, OPTION and TOWARD, and RNA samples were from RADIATE. These trials evaluated tocilizumab (4 mg/kg or 8 mg/kg), administered every 4 weeks over a period of 24 weeks or longer, compared with placebo. The study populations differed according to background therapy with methotrexate (MTX) (OPTION, LITHE, RADIATE), any DMARD (TOWARD) or no DMARD (AMBITION). They also differed according to previous inadequate response to anti-tumour necrosis factor (aTNF) agents (RADIATE), MTX (OPTION, TOWARD, LITHE) or neither (AMBITION). In all studies, oral corticosteroids ( $\leq 10$  mg/day prednisone or equivalent) were permitted if the dose was stable for at least 6 weeks before baseline. The study protocols were approved by relevant institutional review boards or ethics committees, and written informed consent was obtained from each patient. The studies were carried out in full concordance with the principles of the Declaration of Helsinki and with the laws and regulations of the country in which the research was conducted. DNA and RNA samples were collected only from patients who gave separate informed consent. DNA and RNA extraction methods are described in the Supplementary Material.

### Serum analysis for IL-6 and sIL-6R

Three assays for serum IL-6 levels were used to analyse samples from TOWARD, as follows: Quantikine Human IL-6 Immunoassay (R&D Systems Inc., Minneapolis, MN), performed by Huntington Life Sciences (Huntington, UK) according to the instructions of the manufacturer (Roche Diagnostics, Penzberg, Germany) of the IL-6 assay<sup>17</sup>; IMPACT platform,<sup>18</sup> performed by Roche Diagnostics; and RBM IL-6 assay, performed by Myriad RBM (Austin, TX). Given the tight correlations among these three assays (Supplementary Figure 1A), we chose to analyse data from the Quantikine Human IL-6 Immunoassay (R&D Systems Inc.) because they were available for nearly all patients in all five core studies. The limit of detection of this IL-6 assay is 3.12 pg/ml. The assay is unaffected by the addition of recombinant human sIL-6R<sup>19</sup>; therefore, it can be assumed that the data reflect the total concentration of IL-6 (i.e. the concentration of free IL-6 plus the amount of IL-6 bound to sIL-6R).

Serum concentrations of endogenous sIL-6R were measured by Huntington Life Sciences using the Quantikine Human sIL-6R Immunoassay (R&D Systems Inc.) according to the manufacturer's instructions. The sensitivity of the sIL-6R assay is 31.2 pg/ml. Measured sIL-6R concentrations are insensitive to the addition of recombinant human IL-6 but are sensitive to the presence of tocilizumab.<sup>20</sup> Therefore, it can be assumed that the sIL-6R data presented reflect the total amount of free sIL-6R plus sIL-6R complexed with IL-6 plus (in samples that contain tocilizumab) an unquantified fraction of sIL-6R bound by tocilizumab.

## Genotyping

DNA samples were genotyped using HumanHap550k BeadChip version 3.0 (Illumina, San Diego, CA) and custom chips using the OPA genotyping assay. Quality control (QC) methods for DNA samples and genotyping data are described in the Supplementary Material. High-quality markers with call rates  $\geq 95\%$  were included in the analysis. To reduce the multiplicity of hypothesis testing, a targeted approach was taken. Three groups of genes were considered in this analysis. Tier 1 markers consisted of 26 polymorphisms within the *IL-6* and *IL-6R* regions (Supplementary Table 1). Ten SNPs were selected in the *IL-6* region, which is defined as 5 kb upstream and 5 kb downstream of the transcription coordinate; the SNPs cover a region of 12.6 kb. Similarly, 18 SNPs were selected in the *IL-6R* region, covering a region of 62.2 kb. The association of these markers with treatment benefit represents primary hypotheses. Tier 2 markers consisted of 233 polymorphisms within 22 genes identified as in the *IL-6* pathway, termed the *IL-6* canonical pathway (Supplementary Material). Tier 3 markers consisted of 1,005 polymorphisms in 67 genes, identified with GeneGo (Carlsbad, CA) software, related to *IL-6* signalling, herein termed the *IL-6* network (Supplementary Material). Markers for tiers 2 and 3 correspond to the decreasing strength of the hypothesis and the increasing dimensions compared with tier 1 markers. This approach provides greater power in the confirmatory analysis for the primary biomarker hypothesis yet allows for focused exploratory analysis to address the secondary hypotheses.

Polymerase chain reaction (PCR)-based HLA-DRB1 typing was performed on the DNA samples independently of the genotyping using whole genome and custom arrays. The



1  
2  
3 number of shared epitope alleles (0, 1 or 2) was determined for each patient based on his  
4  
5 or her HLA-DRB1 genotype.  
6  
7  
8  
9

### 10 11 **Transcript analysis**

12  
13  
14 Two hundred thirty-three RNA samples, prepared from whole blood, at baseline were  
15  
16 analysed using the GeneChip<sup>®</sup> Human Genome U133 Plus 2.0 Array (Affymetrix, Santa  
17  
18 Clara, CA). After samples that failed quality control tests were removed (Supplementary  
19  
20 Material), data for the remaining 217 samples were normalised using the Robust Multi-  
21  
22 Array Analysis normalisation<sup>21</sup> (Bioconductor). Transcripts for *IL-6*, *IL-6R* and *IL-6ST*  
23  
24 were extracted from the normalised data. *IL-6* transcript levels were not analysed because  
25  
26 of the low levels of signal observed. Three probe sets targeting *IL-6R* were analysed. Of  
27  
28 those, 205945\_at and 217489\_at expression levels were found to be strongly correlated  
29  
30 (Pearson's  $r^2=0.75$ ), and the third probe set, 226333\_at, had a weaker correlation with the  
31  
32 other two (Pearson's  $r^2=0.34$  and  $r^2=0.38$ ). These three probe sets represent the primary  
33  
34 hypothesis in RNA transcripts. In addition, seven probe sets from *IL-6ST* were analysed  
35  
36 as secondary markers.  
37  
38  
39  
40  
41  
42  
43  
44  
45

### 46 **Measures of disease activity and clinical response**

47  
48 Six different measures were used for disease activity at baseline: erythrocyte  
49  
50 sedimentation rate (ESR), CRP, swollen joint count at 28 joints (SJC28), tender joint  
51  
52 count at 28 joints (TJC28) and Health Assessment Questionnaire (HAQ), with disease  
53  
54 activity at 28 joints (DAS28; derived from the four core components of ESR, SJC, TJC  
55  
56 and patient global assessment) considered the primary end point. As a measurement of  
57  
58  
59  
60

1  
2  
3 treatment response, change in DAS28 from baseline at week 16 (cDAS28) was mainly  
4 used. Unlike dichotomous responder criteria (e.g. ACR response, DAS28 remission and  
5 clinical disease activity index remission), this continuous measure captures the range of  
6 individual responses and is therefore more sensitive in detecting the effect of biomarkers  
7 across different levels of prevalence. In all studies except AMBITION, patients were  
8 allowed to enter escape therapy at 16 weeks if they had inadequate responses. Therefore,  
9 cDAS28 was used at week 16 to increase the sample size and to minimise bias.  
10  
11  
12  
13  
14  
15  
16  
17  
18  
19  
20  
21  
22

### 23 **Statistical analysis**

24  
25 Table 2 provides a summary of all markers analysed. Quality control analyses were  
26 performed for genotyping and gene expression data, as described in the Supplementary  
27 Material; assays and samples with poor data quality were removed. Distribution was  
28 assessed for each marker, and appropriate transformation was applied before further  
29 analysis. Minor allele frequencies and Hardy-Weinberg equilibrium were calculated for  
30 single nucleotide polymorphisms (SNPs). Given that the distribution within each gene  
31 expression probe set was approximately normal, no further transformation was applied.  
32 Log transformation was applied to the protein markers IL-6 and sIL-6R because of the  
33 skewed distribution of raw values.  
34  
35  
36  
37  
38  
39  
40  
41  
42  
43  
44  
45  
46  
47  
48

49 Correlations among the baseline markers were assessed within each sample type to  
50 enable understanding of the amount of information shared among the assays. For SNPs,  
51 linkage disequilibrium coefficients within IL-6 and IL-6R were obtained from HapMap  
52 22 based on the CEU (Utah residents of Northern and Western European ancestry from  
53  
54  
55  
56  
57  
58  
59  
60

1  
2  
3 the CEPH collection) data. For the gene expression markers, correlation coefficients were  
4  
5 calculated among probe sets within *IL-6R* and *IL-6ST*. For the proteins, correlation was  
6  
7 calculated among the three assays for IL-6 and between IL-6 and sIL-6R. Pearson or  
8  
9 Spearman rank correlation was used as appropriate.  
10  
11

12  
13  
14  
15 Linear regression was used to assess the association between markers with baseline  
16  
17 disease activity and markers with treatment response. Because of the skewed distribution  
18  
19 of the raw values, log(ESR) and log(CRP+1) were used in the regression analysis. All  
20  
21 patients were included in the regression analysis of baseline disease activity. In the  
22  
23 regression analysis of cDAS28, separate analyses were undertaken in patients treated  
24  
25 with tocilizumab and those administered placebo. Given that baseline DAS28 is strongly  
26  
27 associated with change in DAS28 at week 16, it was included as a covariate in all models.  
28  
29 No additional covariates were included in the model. In addition, the number of shared  
30  
31 epitope alleles<sup>22</sup> (0, 1 or 2) and the tocilizumab dose were used as covariates in the  
32  
33 analysis of genetic data.  
34  
35  
36  
37  
38  
39  
40

41 The numbers of genetic markers tested were 18, 233 and 1,004, respectively, for the tier  
42  
43 1, 2 and 3 markers. In addition, six baseline end points were used on the baseline disease  
44  
45 association analysis. Analyses were undertaken in the white population and the all-patient  
46  
47 population. To adjust for multiple testing, the false discovery rate (FDR)<sup>23</sup> was calculated  
48  
49 within each tier and within the white population and the all-patient population. This FDR  
50  
51 accounted for the multiplicity of markers and the end points.  
52  
53  
54  
55  
56  
57  
58  
59  
60

1  
2  
3 To help interpret the outcome of the regression analysis and to enable direct comparison  
4 of the analysis results across all markers, consistent representations of the results were  
5 used. For continuous markers, the regression coefficients were standardised to reflect  
6 how many units of change in the end points corresponded to a difference of 1 standard  
7 deviation (SD) in the marker value. For the SNP markers, an allelic model was used (i.e.  
8 two copies of the minor allele had twice the effect of one copy). The regression  
9 coefficient corresponded to the change in end point per copy of minor allele.  
10  
11  
12  
13  
14  
15  
16  
17  
18  
19  
20  
21

## 22 RESULTS

### 23 Baseline characteristics of patients with DNA, RNA and serum samples

24  
25 Baseline characteristics of the patient subgroups with DNA, RNA and serum samples  
26 available are shown in Table 1. They are generally comparable to the overall population  
27 for each study. Patient ethnicity is relevant to the genetic analysis. Therefore, the  
28 proportion of patients of European ancestry (White) is shown for the DNA  
29 subpopulations. Of the 927 patients with DNA samples, 730 (79%) were of European  
30 ancestry (White) (Table 1). As expected based on treatment experience, patients from the  
31 MTX-naive or the MTX-free study had shorter disease duration, and those from the  
32 aTNF-IR study had longer disease duration. For serum markers where large sample size  
33 was available, data were analysed separately for the MTX-naive/MTX-free population,  
34 pooled DMARD-IR population and aTNF-IR population. The distribution of baseline IL-  
35 6 was similar in the rheumatoid factor–positive and –negative subpopulations ( $45.2 \pm$   
36  $60.5$  and  $41.5 \pm 60.6$  [mean  $\pm$  SD], respectively).  
37  
38  
39  
40  
41  
42  
43  
44  
45  
46  
47  
48  
49  
50  
51  
52  
53  
54  
55  
56  
57  
58  
59  
60

### Associations with baseline disease activity

Higher baseline serum IL-6 levels were significantly associated with higher baseline DAS28, ESR, CRP and HAQ in all three populations analysed, with  $P < 0.0001$  in most cases (Table 3). The strongest association was observed between CRP and IL-6, for a correlation coefficient of 0.29 to 0.36 in three populations (Supplementary Figure 1B). IL-6 was not strongly associated with SJC28 or TJC28. Baseline sIL-6R was not strongly associated with any baseline disease activity measures.

Among the baseline RNA transcripts, an association was observed between the IL-6R transcript and CRP and ESR at baseline (data not shown). No association was found with the other baseline disease activity measures. Association with CRP and ESR was also observed, to a lesser degree, for an IL-6ST transcript.

After correction for multiple testing, no significant associations were found for any of the *IL-6* or *IL-6R* polymorphisms genotyped with baseline disease activity. Of the 1,237 polymorphisms representing 22 genes in the IL-6 canonical pathway, 67 additional genes in the IL-6 network, six baseline disease activity end points and two patient populations (all-patient, white), six associations were found to have borderline significance after adjusting for multiple testing, with an FDR of approximately 5%. There were SNPs in *TOLLIP* and *RUNX1* versus ESR and SNPs in *IL1RAPL1* versus SJC and ESR. Such borderline significance meant the association should be treated as a weak hypothesis.

### Associations with clinical response to tocilizumab

Higher baseline serum IL-6 concentrations were significantly associated with better clinical response to tocilizumab but not to placebo, as measured by cDAS28 in the pooled DMARD-IR population ( $P < 0.0001$ ) (Supplementary Table 2, Figure 1). The same effect was observed in the MTX-naive population ( $P = 0.04$ ). In the aTNF-IR population, the association was not significant, partially because of the smaller sample size. In the DMARD-IR population, a threefold difference in baseline IL-6 concentration, equivalent to 1 SD in the baseline  $\log(\text{IL-6})$  distribution, corresponded to a small difference of 0.17 units in cDAS28 score at week 16. The association between serum IL-6 level and achievement of DAS28 remission ( $\text{DAS28} < 2.6$ ) was analysed using receiver operating characteristic analysis in the pooled DMARD-IR population treated with tocilizumab ( $n = 1,547$ ). The area under the curve was only 0.59, suggesting that baseline serum IL-6 levels provided very little discrimination between those achieving and those not achieving DAS28 remission. In the placebo group, the direction of association was opposite that of tocilizumab-treated patients, indicating that baseline serum IL-6 level (with no longitudinal data on change in level) is not a prognostic factor for clinical response in RA in these cohorts.

Baseline sIL-6R concentration in serum had no effect on treatment response in either the tocilizumab or the placebo group (Supplementary Table 2). IL-6R whole blood mRNA (in RADIATE) was not associated with clinical response to tocilizumab or placebo treatment (Supplementary Table 2). No *IL-6* or *IL-6R* polymorphisms were associated with cDAS28 after correction for multiple testing. Although rs2069840 and rs12700386

1  
2  
3 had a raw  $P < 0.05$  (Table 4), the estimated effect size was small. Each copy of the minor  
4  
5 allele for rs2069840 corresponded to only a 0.3-unit difference in cDAS28. Of the SNPs  
6  
7 in the canonical and the network or signalling pathway, rs973767 (an intronic SNP in  
8  
9 *PTPN2*) had the lowest P value ( $5.7 \times 10^{-5}$ ) but was not significant after correction for  
10  
11 multiple testing (FDR=0.057; Table 4). In the rheumatoid factor–positive subpopulation,  
12  
13 the effect of baseline serum IL-6 on clinical response was very similar to that in the  
14  
15 overall population (Supplementary Figure 3).  
16  
17  
18  
19  
20  
21  
22

## 23 DISCUSSION

24  
25 We have investigated the associations among a number of DNA, RNA and protein  
26  
27 biomarkers directly related to IL-6 signalling (Table 2) with baseline disease activity and  
28  
29 treatment benefit from tocilizumab (Table 1). We demonstrate the modest association  
30  
31 between serum IL-6 levels and clinical disease activity as measured by DAS28 and HAQ.  
32  
33 Although serum IL-6 levels have previously been shown to be elevated in patients with  
34  
35 RA compared with controls,<sup>9,24</sup> this is the first time a significant correlation between IL-6  
36  
37 level and disease activity has been demonstrated in a large population. IL-6 level  
38  
39 accounted for only a small component of observed variance in disease activity  
40  
41 (Supplementary Table 2, Figure 1). Of the four DAS28 components, serum IL-6 level  
42  
43 was most strongly associated with ESR/CRP. This is not surprising given the pivotal role  
44  
45 of IL-6 (and the pronounced inhibitory effect of tocilizumab) on the acute-phase  
46  
47 response.<sup>25</sup> Interestingly, HAQ, a measure of patient-reported disability independent of  
48  
49 inflammation, also had a significant association with serum IL-6 level.  
50  
51  
52  
53  
54  
55  
56  
57  
58  
59  
60

1  
2  
3 Littman<sup>26</sup> proposes that IL-6/tocilizumab may represent ‘low-hanging fruit’ in terms of  
4 personalised health care in RA, but our analysis suggested otherwise. Higher baseline  
5 DAS28 was associated with higher change in DAS28 in response to therapy  
6  
7  
8  
9  
10  
11 (Supplementary Figure 1C). When change in DAS28 was corrected for baseline DAS28,  
12 only a weak association with serum IL-6 was observed. Even though IL-6 has been  
13 shown to decrease with effective treatments, such as modified-release prednisone,<sup>27</sup> in  
14 RA, we saw no evidence that a single baseline ‘snapshot’ serum IL-6 level was a general  
15 prognostic factor for clinical response in RA (i.e. predicted subsequent treatment  
16 response or disease course).  
17  
18  
19  
20  
21  
22  
23  
24  
25  
26

27 Serum IL-6 exhibits a pronounced circadian rhythm.<sup>28</sup> This source of variability was  
28 minimised, but not eliminated, by collecting the samples in as narrow a time window as  
29 achievable in large clinical studies. It is possible that discordance in IL-6 signalling  
30 activity between blood and synovial tissue explains the lack of association with blood  
31 samples in our study. However, this cannot explain the negative genetic data. The lack of  
32 genetic associations between polymorphisms in *IL-6R* (including those determining sIL-  
33 6R levels) and baseline disease activity<sup>11,29</sup> shows that sIL-6R levels, though highly  
34 variable, are not appreciably different between patients who have RA and those who are  
35 healthy.<sup>30,31</sup> The effect of a genetic marker can be affected by a patient’s genetic  
36 background. An ethnically homogeneous population is ideal for genetic analysis. In this  
37 cohort, 79% of the patients were of European ancestry (White). All genetic analyses were  
38 performed in the overall population for maximum sample size and in the White  
39  
40  
41  
42  
43  
44  
45  
46  
47  
48  
49  
50  
51  
52  
53  
54  
55  
56  
57  
58  
59  
60



1  
2  
3 subpopulation for genetic homogeneity. The White subpopulation was sufficiently large;  
4  
5 therefore, the lack of a strong genetic effect is compelling.  
6  
7  
8  
9

10 Formal multiplicity adjustment was not carried out in the analysis of serum and RNA  
11 markers. However, informal assessment was used to help interpret the results of the  
12 statistical analysis. Multiplicity of the statistical testing was indicated by multiple  
13 markers and multiple end points; the numbers of markers in each sample type are shown  
14 in Table 2. Six baseline disease characteristics and one clinical response end point were  
15 used. In addition, genetic analyses were performed in the White and the overall  
16 populations. Overall,  $\geq 10$  tests were carried out for each serum and RNA marker; results  
17 with  $P < 0.0001$  would have been significant had adjustment for multiplicity been  
18 performed, and results with unadjusted  $P > 0.01$  can be regarded as likely false positives.  
19  
20  
21  
22  
23  
24  
25  
26  
27  
28  
29  
30  
31  
32  
33

34 Power assessment was not performed. Empirically, given the large sample size for DNA  
35 and serum samples, the power to detect a clinically relevant effect at  $\alpha = 0.05$  was very  
36 high. Therefore,  $P > 0.05$  can be interpreted as evidence of no effect. Analyses of RNA  
37 markers had low power because of the limited sample size.  
38  
39  
40  
41  
42  
43  
44  
45

46 Our analyses illustrate that in a disease such as RA, variation in the abundance of a  
47 therapeutic target may not be a strong predictor of patient benefit. In particular, the  
48 response to tocilizumab was not dependent on IL-6R SNPs, which were found to be  
49 associated with asthma and cardiovascular risk. In addition, a genome-wide association  
50 approach using 1,600 patients from five controlled clinical trials did not yield any strong  
51  
52  
53  
54  
55  
56  
57  
58  
59  
60

1  
2  
3 predictor to tocilizumab treatment response.<sup>32</sup> These data suggest that the major  
4  
5 contribution to variability in clinical responsiveness to therapeutics in RA remains  
6  
7 unknown, and they illustrate the challenges of identifying predictive biomarkers, even in  
8  
9 large, well-conducted studies.  
10  
11  
12  
13  
14  
15  
16  
17  
18  
19  
20  
21  
22  
23  
24  
25  
26  
27  
28  
29  
30  
31  
32  
33  
34  
35  
36  
37  
38  
39  
40  
41  
42  
43  
44  
45  
46  
47  
48  
49  
50  
51  
52  
53  
54  
55  
56  
57  
58  
59  
60

## Acknowledgements

We thank Stefan Palme for providing the IL-6 data measured on the IMPACT platform; Chih Jian Lih and Mickey Williams for providing the gene expression data; Yan Li for help with the gene expression data QC; Teodorica Bugawan for providing the HLA-DRB1 and shared epitope data; Delphine Lagarde for the DNA and RNA sample preparation and the method description; Gregg Silverman, Ann Begovich, Paul Cutler and Friedemann Krause for helpful discussions; and Santo D'Angelo, PhD, for third-party writing assistance.

This study was funded by Roche. Support for third-party writing assistance for this manuscript was provided by F. Hoffmann-La Roche Ltd.

## Funding

This study was funded by Roche. Support for third-party writing assistance for this manuscript was provided by F. Hoffmann-La Roche Ltd.

## Competing interests

All authors are (or were at the time of the study) employees of Roche or Genentech, a member of the Roche group, and four authors (AH, AK, OH and RU) also own stock in Roche.

## Author contributions

JW designed the study, conducted research, conducted the literature search, analysed and interpreted the data and drafted the manuscript; AP designed the study, conducted research, conducted the literature search, collected data, analysed and interpreted the data, oversaw data collection and drafted the manuscript; RU analysed and interpreted the data and drafted the manuscript; SG designed the study and collected data; GL analysed and interpreted the data; CR analysed and interpreted the data; RB designed the study, collected data and analysed the data; AK analysed and interpreted the data; AH designed the study and collected data; MM designed the study; OH interpreted the data and drafted the manuscript.

All authors revised the manuscript critically for important intellectual content and approved the final version for submission.

## Ethics approval

The study protocols were approved by relevant institutional review boards or ethics committees, and written informed consent was obtained from each patient. The studies were carried out in full concordance with the principles of the Declaration of Helsinki and with the laws and regulations of the country in which the research was conducted.

DNA and RNA samples were collected only from patients who gave separate informed consent.

## Data sharing

No additional data are available at this time.

**FIGURE**

**Figure 1.** Serum IL-6 concentration association with response to treatment. Forest plots show the effect and 95% CI for the association of IL-6 with cDAS28 at 16 weeks across treatment lines. cDAS28, change in DAS28 from baseline at week 16; CI, confidence interval; DMARD, disease-modifying antirheumatic drug; IR, inadequate responder; MTX, methotrexate; SD, standard deviation; TCZ, tocilizumab; TNF, tumour necrosis factor. •, MTX/DMARD; •, TCZ+MTX/DMARD.

## References

- 1 Cronstein BN. Interleukin-6--a key mediator of systemic and local symptoms in rheumatoid arthritis. *Bull NYU Hosp Joint Dis* 2007; **65**: S11-5.
- 2 Wrighting DM, Andrews NC. Interleukin-6 induces hepcidin expression through STAT3. *Blood* 2006; **108**: 3204-9.
- 3 Smolen JS, Beaulieu A, Rubbert-Roth A, *et al*. Effect of interleukin-6 receptor inhibition with tocilizumab in patients with rheumatoid arthritis (OPTION study): a double-blind, placebo-controlled, randomised trial. *Lancet* 2008; **371**: 987-97.
- 4 Emery P, Keystone E, Tony HP, *et al*. IL-6 receptor inhibition with tocilizumab improves treatment outcomes in patients with rheumatoid arthritis refractory to anti-tumour necrosis factor biologicals: results from a 24-week multicentre randomised placebo-controlled trial. *Ann Rheum Dis* 2008; **67**: 1516-23.
- 5 Genovese MC, McKay JD, Nasonov EL, *et al*. Interleukin-6 receptor inhibition with tocilizumab reduces disease activity in rheumatoid arthritis with inadequate response to disease-modifying antirheumatic drugs: the tocilizumab in combination with traditional disease-modifying antirheumatic drug therapy study. *Arthritis Rheum* 2008; **58**: 2968-80.
- 6 Jones G, Sebba A, Gu J, *et al*. Comparison of tocilizumab monotherapy versus methotrexate monotherapy in patients with moderate to severe rheumatoid arthritis: the AMBITION study. *Ann Rheum Dis* 2010; **69**: 88-96.

- 1  
2  
3 7 Kremer JM, Blanco R, Brzosko S, *et al.* Tocilizumab inhibits structural joint  
4 damage in rheumatoid arthritis patients with inadequate responses to methotrexate:  
5 results from the double-blind treatment phase of a randomized placebo-controlled  
6 trial of tocilizumab safety and prevention of structural joint damage at one year.  
7  
8  
9  
10  
11  
12  
13 *Arthritis Rheum* 2011; **63**: 609-21.
- 14  
15  
16 8 Nishimoto N, Yoshizaki K, Miyasaka N, *et al.* Treatment of rheumatoid arthritis  
17 with humanized anti-interleukin-6 receptor antibody: a multicenter, double-blind,  
18 placebo-controlled trial. *Arthritis Rheum* 2004; **50**: 1761-9.
- 19  
20  
21  
22  
23  
24 9 Madhok R, Crilly A, Watson J, *et al.* Serum interleukin 6 levels in rheumatoid  
25 arthritis: correlations with clinical and laboratory indices of disease activity. *Ann*  
26  
27  
28  
29  
30  
31  
32  
33 10 Robak T, Gladalska A, Stepien H, *et al.* Serum levels of interleukin-6 type  
34 cytokines and soluble interleukin-6 receptor in patients with rheumatoid arthritis.  
35  
36  
37  
38  
39  
40  
41 11 Galicia JC, Tai H, Komatsu Y, *et al.* Polymorphisms in the IL-6 receptor (IL-6R)  
42 gene: strong evidence that serum levels of soluble IL-6R are genetically influenced.  
43  
44  
45  
46  
47  
48  
49 12 Marinou I, Walters K, Winfield J, *et al.* A gain of function polymorphism in the  
50 interleukin 6 receptor influences RA susceptibility. *Ann Rheum Dis* 2010; **69**: 1191-  
51  
52  
53  
54  
55  
56  
57  
58  
59  
60

- 1  
2  
3  
4  
5  
6  
7  
8  
9  
10  
11  
12  
13  
14  
15  
16  
17  
18  
19  
20  
21  
22  
23  
24  
25  
26  
27  
28  
29  
30  
31  
32  
33  
34  
35  
36  
37  
38  
39  
40  
41  
42  
43  
44  
45  
46  
47  
48  
49  
50  
51  
52  
53  
54  
55  
56  
57  
58  
59  
60
- 13 Fishman D, Faulds G, Jeffery R, *et al.* The effect of novel polymorphisms in the interleukin-6 (IL-6) gene on IL-6 transcription and plasma IL-6 levels, and an association with systemic-onset juvenile chronic arthritis. *J Clin Invest* 1998; **102**: 1369-76.
  - 14 Hingorani AD, Casas JP. The interleukin-6 receptor as a target for prevention of coronary heart disease: a mendelian randomisation analysis. *Lancet* 2012; **379**: 1214-24.
  - 15 Sarwar N, Butterworth AS, Freitag DF, *et al.* Interleukin-6 receptor pathways in coronary heart disease: a collaborative meta-analysis of 82 studies. *Lancet* 2012; **379**: 1205-13.
  - 16 Ferreira MA, Matheson MC, Duffy DL, *et al.* Identification of IL6R and chromosome 11q13.5 as risk loci for asthma. *Lancet* 2011; **378**: 1006-14.
  - 17 Fraunberger P, Pfeiffer M, Cremer P, *et al.* Validation of an automated enzyme immunoassay for interleukin-6 for routine clinical use. *Clin Chem Lab Med* 1998; **36**: 797-801.
  - 18 Claudon A, Vergnaud P, Valverde C, *et al.* New automated multiplex assay for bone turnover markers in osteoporosis. *Clin Chem* 2008; **54**: 1554-63.
  - 19 R&D Systems Inc. Quantikine<sup>®</sup> ELISA human IL-6 immunoassay. Minneapolis, MN: R&D Systems Inc.; 2011.



- 1  
2  
3  
4  
5  
6  
7  
8  
9  
10  
11  
12  
13  
14  
15  
16  
17  
18  
19  
20  
21  
22  
23  
24  
25  
26  
27  
28  
29  
30  
31  
32  
33  
34  
35  
36  
37  
38  
39  
40  
41  
42  
43  
44  
45  
46  
47  
48  
49  
50  
51  
52  
53  
54  
55  
56  
57  
58  
59  
60
- 20 R&D Systems Inc. Quantikine<sup>®</sup> ELISA human IL-6 sR immunoassay. Minneapolis, MN: R&D Systems Inc.; 2009.
- 21 Irizarry RA, Bolstad BM, Collin F, *et al.* Summaries of AffymetrixGeneChip probe level data. *Nucleic Acids Res* 2003;31:e15.
- 22 Gregersen PK, Silver J, Winchester RJ. The shared epitope hypothesis: an approach to understanding the molecular genetics of susceptibility to rheumatoid arthritis. *Arthritis Rheum* 1987; **30**: 1205-13.
- 23 Benjamini Y, Hochberg Y. Controlling the false discovery rate: a practical and powerful approach to multiple testing. *J R Stat Soc* 1995; **57**: 289-300.
- 24 Chung SJ, Kwon YJ, Park MC, *et al.* The correlation between increased serum concentrations of interleukin-6 family cytokines and disease activity in rheumatoid arthritis patients. *Yonsei Med J* 2011; **52**: 113-20.
- 25 Heinrich PC, Castell JV, Andus T. Interleukin-6 and the acute phase response. *Biochem J* 1990; **265**: 621-36.
- 26 Littman BH. Tocilizumab and missed personalized medicine opportunities for patients with rheumatoid arthritis? *Arthritis Rheum* 2009; **60**: 1565-6.
- 27 Buttgereit F, Doering G, Schaeffler A, *et al.* Efficacy of modified-release versus standard prdnisone to reduce duration of morning stiffness of the joints in rheumatoid arthritis (CAPRA-1): a double-blind, randomised controlled trial. *Lancet* 2008; **371**: 205-14

- 1  
2  
3  
4  
5  
6  
7  
8  
9  
10  
11  
12  
13  
14  
15  
16  
17  
18  
19  
20  
21  
22  
23  
24  
25  
26  
27  
28  
29  
30  
31  
32  
33  
34  
35  
36  
37  
38  
39  
40  
41  
42  
43  
44  
45  
46  
47  
48  
49  
50  
51  
52  
53  
54  
55  
56  
57  
58  
59  
60
- 28 Kirwan JR, Clarke L, Hunt LP, *et al.* Effect of novel therapeutic glucocorticoids on circadian rhythms of hormones and cytokines in rheumatoid arthritis. *Ann NY Acad Sci* 2010; **1193**: 127-33.
- 29 Rafiq S, Frayling TM, Murray A, *et al.* A common variant of the interleukin 6 receptor (IL-6r) gene increases IL-6r and IL-6 levels, without other inflammatory effects. *Genes Immun* 2007; **8**: 552-9.
- 30 De Benedetti F, Pignatti P, Gerloni V, *et al.* Differences in synovial fluid cytokine levels between juvenile and adult rheumatoid arthritis. *J Rheumatol* 1997; **24**: 1403-9.
- 31 Frieling JT, Sauerwein RW, Wijdenes J, *et al.* Soluble interleukin 6 receptor in biological fluids from human origin. *Cytokine* 1994; **6**: 376-81.
- 32 Wang J, Bansal AT, Martin M, *et al.* Genome-wide association analysis implicates the involvement of eight loci with response to tocilizumab for the treatment of rheumatoid arthritis. *Pharmacogenomics J* 2013; **13**: 235-41.

## TABLES

**Table 1.** Demographics of patients from whom biological samples were collected and analysed and whose data passed a quality control check

| Sample type        | DNA               |                   |                     | RNA               | Serum             |                   |                     |                   |                   |
|--------------------|-------------------|-------------------|---------------------|-------------------|-------------------|-------------------|---------------------|-------------------|-------------------|
| Study              | OPTION            | RADIATE           | TOWARD              | RADIATE           | OPTION            | LITHE             | TOWARD              | AMBITION          | RADIATE           |
| Patient population | MTX-IR            | aTNF-IR           | DMARD-IR            | aTNF-IR           | MTX-IR            | MTX-IR            | DMARD-IR            | MTX naive or free | aTNF-IR           |
| Treatment          | 8 mg/kg TCZ + MTX | 8 mg/kg TCZ + MTX | 8 mg/kg TCZ + DMARD | 8 mg/kg TCZ + MTX | 8 mg/kg TCZ + MTX | 8 mg/kg TCZ + MTX | 8 mg/kg TCZ + DMARD | 8 mg/kg TCZ + MTX | 8 mg/kg TCZ + MTX |
|                    | 4 mg/kg TCZ + MTX | 4 mg/kg TCZ + MTX |                     | 4 mg/kg TCZ + MTX | 4 mg/kg TCZ + MTX | 4 mg/kg TCZ + MTX |                     |                   | 4 mg/kg TCZ + MTX |
|                    | MTX               | MTX               | DMARD               | MTX               | MTX               | MTX               | DMARD               | MTX               | MTX               |
| Total patients, n  | 286               | 178               | 463                 | 217               | 603               | 1126              | 1010                | 581               | 431               |
| TCZ, n             | 189               | 119               | 301                 | 151               | 409               | 753               | 661                 | 244               | 289               |
| MTX, n             | 97                | 59                | 162                 | 66                | 194               | 373               | 349                 | 337               | 142               |
| Age, years         | 51.3 (11.1)       | 51.5 (12.4)       | 54.2 (12.6)         | 53.2 (11.9)       | 51.0 (12.2)       | 51.9 (12.4)       | 53.4 (12.9)         | 50.3 (13.0)       | 52.9 (12.6)       |
| Female, %          | 79.0              | 79.8              | 81.0                | 82.40             | 81.8              | 82.9              | 81.7                | 80.4              | 81.4              |
| Height, cm         | 163 (9)           | 165 (8)           | 164 (9)             | 165 (8)           | 162 (9)           | 162 (9)           | 163 (9)             | 163 (9)           | 165 (8)           |
| Weight, kg         | 73 (17)           | 77 (19)           | 76 (18)             | 77 (20)           | 79 (17)           | 73 (19)           | 74 (19)             | 73 (18)           | 75 (18)           |
| RA duration, years | 7.8 (7.3)         | 11.1 (8.3)        | 9.7 (9.1)           | 12.1 (9.6)        | 7.6 (7.3)         | 9.2 (8.0)         | 9.6 (8.8)           | 6.4 (8.2)         | 11.6 (9.1)        |
| RF positive, %     | 76.2              | 79.8              | 75.6                | 76.5              | 77.6              | 82.1              | 77.1                | 72.5              | 75.2              |
| White, %           | 73.8              | 93.3              | 76.2                | Not applicable    | Not applicable    |                   |                     |                   |                   |
| TCZ, n             | 141               | 109               | 233                 |                   |                   |                   |                     |                   |                   |
| MTX, n             | 70                | 57                | 120                 |                   |                   |                   |                     |                   |                   |
| DAS28              | 6.8 (0.9)         | 6.8 (1)           | 6.6 (1)             | 6.8 (0.9)         | 6.8 (0.9)         | 6.5 (0.9)         | 6.7 (1.0)           | 6.8 (0.9)         | 6.8 (1.0)         |
| HAQ                | 1.6 (0.6)         | 1.7 (0.6)         | 1.5 (0.6)           | 1.7 (0.6)         | 1.6 (0.6)         | 1.5 (0.6)         | 1.5 (0.6)           | 1.5 (0.6)         | 1.7 (0.6)         |
| SJC                | 20.9 (11.3)       | 18.8 (10.6)       | 20.5 (11.9)         | 18.1 (9.8)        | 20.0 (11.2)       | 16.9 (9.4)        | 19.6 (11.5)         | 19.8 (11.2)       | 18.9 (10.6)       |
| TJC                | 32.3 (15.2)       | 31.2 (15.2)       | 30.1 (15.8)         | 31.4 (15.1)       | 32.6 (15.6)       | 28.3 (14.7)       | 30.0 (15.7)         | 31.9 (14.4)       | 31.1 (15.6)       |
| CRP                | 2.4 (2.9)         | 3.7 (4.2)         | 2.3 (2.9)           | 3.3 (3.8)         | 2.6 (3.0)         | 2.2 (2.5)         | 2.6 (3.8)           | 3.0 (3.3)         | 3.2 (3.8)         |

1  
2  
3  
4  
5 aTNF, anti-tumour necrosis factor; CRP, C-reactive protein; DAS28 , Disease Activity Score using 28 joints; DMARD, disease-  
6  
7 modifying antirheumatic drug; HAQ, Health Assessment Questionnaire; IR, inadequate responder; MTX, methotrexate; RA,  
8  
9 rheumatoid arthritis; RF, rheumatoid factor; SJC, swollen joint count; TCZ, tocilizumab; TJC, tender joint count.  
10

11 Values with numbers in parentheses are mean (SD).  
12  
13  
14  
15  
16  
17  
18  
19  
20  
21  
22  
23  
24  
25  
26  
27  
28  
29  
30  
31  
32  
33  
34  
35  
36  
37  
38  
39  
40  
41  
42  
43  
44  
45  
46  
47  
48  
49

1  
2  
3  
4  
5  
6  
7  
8  
9  
10  
11  
12  
13  
14  
15  
16  
17  
18  
19  
20  
21  
22  
23  
24  
25  
26  
27  
28  
29  
30  
31  
32  
33  
34  
35  
36  
37  
38  
39  
40  
41  
42  
43  
44  
45  
46  
47  
48  
49

**Table 2.** Summary of markers investigated. For the DNA markers, SNPs in IL-6 and IL-6R are considered tier 1, IL-6 network genes are considered tier 2, and IL-6 pathway genes are considered tier 3

| Sample type      | Target gene        | Analytes, n          | Assay (manufacturer)                                                   |
|------------------|--------------------|----------------------|------------------------------------------------------------------------|
| <b>Primary</b>   |                    |                      |                                                                        |
| DNA              | <i>IL-6</i>        | 10 SNPs              | Bead-Chip arrays HumanHap550k version 3.0, OPA custom array (Illumina) |
|                  | <i>IL-6R</i>       | 18 SNPs              |                                                                        |
| RNA              | <i>IL-6R</i>       | 3 probe sets         | GeneChip Human Genome U133 Plus 2.0 Array (Affymetrix)                 |
| Serum            | <i>IL-6</i>        | 1                    | Human IL-6 Immunoassay (Quantikine)                                    |
|                  | <i>sIL-6R</i>      | 1                    | Human sIL-6R Immunoassay (Quantikine)                                  |
| <b>Secondary</b> |                    |                      |                                                                        |
| DNA              | IL-6 network genes | 233 SNPs (22 genes)  | Bead-Chip arrays HumanHap550k version 3.0, OPA custom array (Illumina) |
|                  | IL-6 pathway genes | 1004 SNPs (67 genes) |                                                                        |
| RNA              | <i>IL-6ST</i>      | 7 probe sets         | GeneChip Human Genome U133 Plus 2.0 Array (Affymetrix)                 |

IL-6, interleukin 6; IL-6R, IL-6 receptor; IL-6ST, IL-6 signal transducer; sIL-6R, soluble IL-6R; SNP, single-nucleotide polymorphism.

**Table 3.** Association of markers with baseline disease activity. All results for serum markers are shown. For RNA, the probe sets within each gene were strongly correlated. One probe set each in IL-6R and IL-6ST is shown. For DNA, only associations with raw  $P < 0.01$  (tier 1) and FDR  $P < 0.05$  (tiers 2 and 3) were shown. FDR was calculated within the population (white or all) and within the tier

| Serum protein and RNA markers |         |            |         |                 |              |         |                 |                      |                     |
|-------------------------------|---------|------------|---------|-----------------|--------------|---------|-----------------|----------------------|---------------------|
|                               |         | Serum IL-6 |         |                 | Serum sIL-6R |         |                 | IL-6R<br>217489_s_at | IL-6ST<br>234967_at |
| End point                     |         | AMBITION   | RADIATE | Pooled DMARD-IR | AMBITION     | RADIATE | Pooled DMARD-IR | RADIATE              | RADIATE             |
| DAS28                         | n       | 480        | 322     | 2286            | 577          | 423     | 2620            | 217                  | 217                 |
|                               | $\beta$ | 0.209      | 0.257   | 0.201           | -0.007       | 0.075   | 0.054           | 0.109                | -0.04               |
|                               | $r^2$   | 0.051      | 0.072   | 0.044           | 0            | 0.006   | 0.003           | 0.013                | 0.002               |
|                               | p       | <0.0001    | <0.0001 | <0.0001         | 0.8478       | 0.1018  | 0.0044          | 0.09                 | 0.54                |
| TJC                           | n       | 481        | 327     | 2305            | 580          | 428     | 2642            | 217                  | 217                 |
|                               | $\beta$ | -0.186     | 1.455   | 0.138           | -0.154       | 1.28    | 0.054           | 0.27                 | 1.276               |
|                               | $r^2$   | 0          | 0.009   | 0               | 0            | 0.007   | 0               | 0                    | 0.007               |
|                               | p       | 0.7742     | 0.0938  | 0.6611          | 0.7967       | 0.0889  | 0.8558          | 0.79                 | 0.2140              |
| SJC                           | n       | 481        | 327     | 2305            | 580          | 428     | 2642            | 217                  | 217                 |
|                               | $\beta$ | 0.247      | 1.421   | 0.813           | -0.679       | -0.069  | 0.52            | -0.864               | 0.218               |
|                               | $r^2$   | 0          | 0.018   | 0.006           | 0.004        | 0       | 0.002           | 0.008                | 0                   |
|                               | p       | 0.6279     | 0.0158  | 0.0003          | 0.1424       | 0.8938  | 0.013           | 0.1950               | 0.7440              |
| ESR                           | n       | 481        | 327     | 2299            | 580          | 428     | 2635            | 217                  | 217                 |
|                               | $\beta$ | 0.19       | 0.172   | 0.151           | 0.039        | -0.003  | 0.023           | 0.164                | -0.132              |
|                               | $r^2$   | 0.088      | 0.091   | 0.055           | 0.004        | 0       | 0.001           | 0.082                | 0.053               |

|     |         |         |         |         |        |        |        |         |        |
|-----|---------|---------|---------|---------|--------|--------|--------|---------|--------|
|     | p       | <0.0001 | <0.0001 | <0.0001 | 0.132  | 0.9158 | 0.0672 | <0.0001 | 0.0007 |
| CRP | n       | 481     | 327     | 2305    | 580    | 428    | 2642   | 217     | 217    |
|     | $\beta$ | 0.363   | 0.429   | 0.35    | 0.007  | 0.019  | 0.019  | 0.228   | -0.145 |
|     | $r^2$   | 0.288   | 0.358   | 0.309   | 0      | 0.001  | 0.001  | 0.089   | 0.036  |
|     | p       | <0.0001 | <0.0001 | <0.0001 | 0.8103 | 0.5935 | 0.1242 | <0.0001 | 0.005  |
| HAQ | n       | 480     | 324     | 2165    | 579    | 425    | 2465   | 217     | 217    |
|     | $\beta$ | 0.085   | 0.145   | 0.084   | 0.002  | 0.074  | 0.024  | 0.048   | -0.103 |
|     | $r^2$   | 0.019   | 0.062   | 0.018   | 0      | 0.016  | 0.002  | 0.007   | 0.031  |
|     | p       | 0.0022  | <0.0001 | <0.0001 | 0.933  | 0.0089 | 0.0504 | 0.22    | 0.009  |

**DNA markers**

| Tier | Gene             | Chr | SNP        | Population | MAF  | End point | n   | $\beta$ | SE      | Raw P   | FDR P |
|------|------------------|-----|------------|------------|------|-----------|-----|---------|---------|---------|-------|
| 1    | <i>IL-6R</i>     | 1   | rs1386821  | White      | 0.17 | HAQ       | 708 | 0.135   | 0.041   | 0.001   | 0.18  |
|      |                  |     |            | All        | 0.15 | HAQ       | 845 | 0.118   | 0.040   | 0.004   | 0.52  |
|      | <i>TOLLIP</i>    | 11  | rs5743899  | All        | 0.22 | ESR       | 893 | 0.15    | 0.03449 | 1.5E-05 | 0.046 |
|      | <i>RUNX1</i>     | 21  | rs2252585  | All        | 0.32 | ESR       | 905 | 0.1209  | 0.02884 | 3.0E-05 | 0.046 |
| 3    | <i>IL-1RAPL1</i> | 23  | rs12559028 | All        | 0.49 | SJC       | 905 | 2.182   | 0.5349  | 4.9E-05 | 0.050 |
|      |                  |     |            | All        | 0.44 | SJC       | 905 | 2.27    | 0.5424  | 3.1E-05 | 0.046 |
|      |                  |     |            | All        | 0.38 | SJC       | 905 | 2.321   | 0.5592  | 3.6E-05 | 0.046 |
|      |                  |     |            | All        | 0.45 | ESR       | 897 | 0.1181  | 0.02853 | 3.8E-05 | 0.046 |

$\beta$ , regression coefficient, representing the difference in the end point corresponding to standard deviation in marker value; Chr, chromosome; CRP, C-reactive protein; DAS28, Disease Activity Score using 28 joints; DMARD, disease-modifying antirheumatic drug; ESR, erythrocyte sedimentation rate; HAQ, Health Assessment Questionnaire; IL-6ST, IL-6 signal transducer; IR, inadequate responder; MAF, minor allele frequency; MTX, methotrexate; SJC, swollen joint count; TCZ, tocilizumab; TJC, tender joint count.

**Table 4.** Association of baseline markers with treatment response measured by change in DAS28 from baseline at week 16. Baseline DAS28 and TCZ dose were included in the model as covariates. FDR was calculated within the white or all population and within the tier

| All association results for primary DNA markers |            |                   |      |         |      |       |                     |      |         |      |        |
|-------------------------------------------------|------------|-------------------|------|---------|------|-------|---------------------|------|---------|------|--------|
| Gene                                            | SNP        | All DMARD-IR, TCZ |      |         |      |       | White DMARD-IR, TCZ |      |         |      |        |
|                                                 |            | MAF               | n    | $\beta$ | SE   | Raw P | MAF                 | n    | $\beta$ | SE   | Raw P  |
| <i>IL-6</i>                                     | rs12700386 | 0.19              | 583  | 0.22    | 0.11 | 0.049 | 0.18                | 468  | 0.16    | 0.13 | 0.20   |
|                                                 | rs2069833  | 0.35              | 584  | -0.08   | 0.08 | 0.34  | 0.42                | 469  | -0.13   | 0.09 | 0.18   |
|                                                 | rs2069837  | 0.08              | 586  | -0.11   | 0.15 | 0.44  | 0.08                | 471  | -0.05   | 0.16 | 0.75   |
|                                                 | rs2066992  | 0.12              | 586  | -0.09   | 0.12 | 0.49  | 0.06                | 471  | -0.11   | 0.21 | 0.61   |
|                                                 | rs2069840  | 0.32              | 584  | 0.24    | 0.09 | 0.007 | 0.33                | 469  | 0.30    | 0.10 | 0.0026 |
|                                                 | rs1554606  | 0.4               | 586  | -0.10   | 0.08 | 0.23  | 0.45                | 471  | -0.15   | 0.09 | 0.12   |
|                                                 | rs2069845  | 0.4               | 583  | -0.10   | 0.08 | 0.23  | 0.45                | 468  | -0.15   | 0.09 | 0.12   |
|                                                 | rs2069861  | 0.07              | 584  | -0.10   | 0.15 | 0.53  | 0.08                | 469  | -0.11   | 0.16 | 0.50   |
|                                                 | rs10242595 | 0.36              | 586  | -0.02   | 0.08 | 0.86  | 0.32                | 471  | -0.02   | 0.10 | 0.80   |
| rs11766273                                      | 0.07       | 586               | 0.10 | 0.16    | 0.53 | 0.08  | 471                 | 0.05 | 0.17    | 0.75 |        |
| <i>IL-6R</i>                                    | rs1386821  | 0.15              | 586  | 0.02    | 0.12 | 0.87  | 0.17                | 471  | 0.06    | 0.13 | 0.67   |
|                                                 | rs4075015  | 0.39              | 584  | -0.06   | 0.09 | 0.50  | 0.41                | 469  | -0.07   | 0.10 | 0.46   |
|                                                 | rs6684439  | 0.41              | 586  | 0.03    | 0.08 | 0.76  | 0.39                | 471  | 0.06    | 0.10 | 0.55   |
|                                                 | rs4845618  | 0.43              | 582  | 0.03    | 0.08 | 0.74  | 0.44                | 467  | 0.00    | 0.09 | 0.99   |
|                                                 | rs8192282  | 0.15              | 581  | -0.09   | 0.12 | 0.46  | 0.16                | 468  | -0.08   | 0.13 | 0.53   |
|                                                 | rs7549250  | 0.43              | 575  | 0.07    | 0.08 | 0.43  | 0.44                | 462  | 0.02    | 0.09 | 0.81   |
|                                                 | rs4553185  | 0.43              | 586  | 0.04    | 0.08 | 0.60  | 0.44                | 471  | 0.01    | 0.09 | 0.90   |
|                                                 | rs4845623  | 0.44              | 586  | -0.01   | 0.08 | 0.92  | 0.41                | 471  | 0.01    | 0.10 | 0.89   |



1  
2  
3  
4  
5  
6  
7  
8  
9  
10  
11  
12  
13  
14  
15  
16  
17  
18  
19  
20  
21  
22  
23  
24  
25  
26  
27  
28  
29  
30  
31  
32  
33  
34  
35  
36  
37  
38  
39  
40  
41  
42  
43  
44  
45  
46  
47  
48  
49

|  |            |      |     |       |      |      |      |     |       |      |      |
|--|------------|------|-----|-------|------|------|------|-----|-------|------|------|
|  | rs4537545  | 0.44 | 586 | -0.04 | 0.08 | 0.60 | 0.41 | 471 | -0.01 | 0.10 | 0.93 |
|  | rs4129267  | 0.41 | 586 | -0.02 | 0.08 | 0.77 | 0.4  | 471 | 0.02  | 0.10 | 0.87 |
|  | rs8192284  | 0.41 | 582 | -0.03 | 0.08 | 0.76 | 0.4  | 467 | 0.02  | 0.10 | 0.87 |
|  | rs11265618 | 0.17 | 586 | -0.05 | 0.11 | 0.64 | 0.17 | 471 | -0.04 | 0.13 | 0.73 |
|  | rs4329505  | 0.16 | 582 | -0.03 | 0.11 | 0.81 | 0.16 | 467 | -0.02 | 0.13 | 0.87 |
|  | rs4240872  | 0.24 | 586 | 0.03  | 0.10 | 0.79 | 0.23 | 471 | -0.01 | 0.11 | 0.93 |
|  | rs4509570  | 0.24 | 580 | 0.02  | 0.10 | 0.85 | 0.23 | 466 | -0.02 | 0.11 | 0.83 |
|  | rs2229238  | 0.19 | 584 | -0.03 | 0.11 | 0.75 | 0.19 | 469 | 0.00  | 0.12 | 0.98 |
|  | rs7514452  | 0.19 | 586 | -0.03 | 0.11 | 0.77 | 0.19 | 471 | 0.00  | 0.12 | 0.98 |
|  | rs7526293  | 0.2  | 584 | -0.04 | 0.10 | 0.71 | 0.2  | 469 | -0.03 | 0.12 | 0.79 |

**DNA markers analyzed in the pooled DMARD-IR population with an FDR\* of <0.1**

| Tier | Gene         | SNP       | Population | MAF  | n   | $\beta$ | SE   | RAW P   | FDR P |
|------|--------------|-----------|------------|------|-----|---------|------|---------|-------|
| 1    | <i>IL-6</i>  | rs2069840 | White      | 0.33 | 469 | 0.30    | 0.10 | 0.0026  | 0.073 |
| 3    | <i>PTPN2</i> | rs973767  | All        | 0.14 | 586 | 0.48    | 0.12 | 7.2E-05 | 0.072 |
|      |              |           | White      | 0.16 | 471 | 0.53    | 0.13 | 5.7E-05 | 0.057 |

$\beta$ , regression coefficient, representing the difference in DAS28 corresponding to each SD in marker value; DAS28, Disease Activity Score using 28 joints; DMARD, disease-modifying antirheumatic drug; FDR, false discovery rate; IL-6, interleukin-6; IL-6R, IL-6 receptor; IR, inadequate responder; MAF, minor allele frequency; SNP, single nucleotide polymorphism; TCZ, tocilizumab.

1  
2  
3  
4  
5  
6  
7  
8  
9  
10  
11  
12  
13  
14  
15  
16  
17  
18  
19  
20  
21  
22  
23  
24  
25  
26  
27  
28  
29  
30  
31  
32  
33  
34  
35  
36  
37  
38  
39  
40  
41  
42  
43  
44  
45  
46  
47  
48  
49  
50  
51  
52  
53  
54  
55  
56  
57  
58  
59  
60

For peer review only

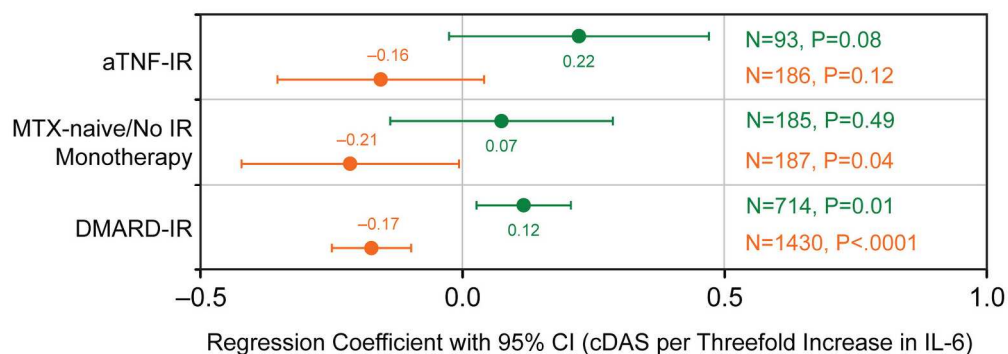

Figure 1. Serum IL-6 concentration association with response to treatment. Forest plots show the effect and 95% CI for the association of IL-6 with cDAS28 at 16 weeks across treatment lines. cDAS28, change in DAS28 from baseline at week 16; CI, confidence interval; DMARD, disease-modifying antirheumatic drug; IR, inadequate responder; MTX, methotrexate; SD, standard deviation; TCZ, tocilizumab; TNF, tumour necrosis factor. •, MTX/DMARD; •, TCZ+MTX/DMARD.

594x228mm (300 x 300 DPI)

## SUPPLEMENTARY MATERIAL

### Identification of genes on IL-6 canonical pathway and signalling network

IL-6 canonical (i.e. pre-built) pathway genes were identified using IL-6 as a seed query of the canonical GeneGo immune response, and signalling network genes were identified using IL-6 as a seed query of the chemokine/cytokine signalling networks. Relevant genes were selected based on the relative strength of literature support for those interactions.

The 22 canonical pathway genes (excluding IL-6 and IL-6R) were: *ADAM10*, *ADAM17*, *CEBPB*, *CEBPD*, *IL6ST*, *JAK1*, *MAP2K1*, *MAP2K2*, *MAPK1*, *MAPK3*, *NFKB1*, *NFKB2*, *NR3C1*, *PTPN11*, *RAF1*, *REL*, *RELA*, *RELB*, *SOCS3*, *SOS1*, *SOS2*, and *STAT3*.

The 67 IL-6 signalling network genes (excluding IL6, IL6R and canonical pathway genes) were: *TNFRSF4*, *MTHFR*, *IL10*, *ATF3*, *IL1R2*, *IL1R1*, *IL1RL2*, *IL1RL1*, *IL1F9*, *IL1RN*, *STAT1*, *CTLA4*, *FN1*, *IRAK2*, *MYD88*, *CD86*, *IL1RAP*, *TLR1*, *RFC1*, *SPP1*, *TLR2*, *PIK3R1*, *IRF1*, *ILA*, *EGR1*, *TNF*, *MAPK14*, *NFKBIE*, *IRAK1BP1*, *MAP3K7*, *IFNGR1*, *ESR1*, *RAC1*, *TRIP6*, *IRF5*, *IKBKB*, *MYC*, *TLR4*, *CHUK*, *TOLLIP*, *TRAF6*, *RELT*, *IL10RA*, *TIRAP*, *STAT6*, *IRAK3*, *NFKBIA*, *SOCS1*, *UBB*, *NOS2*, *STAT5A*, *MAP3K14*, *TYMS*, *PTPN2*, *BCL2*, *ELAVL1*, *TYK2*, *PIK3R2*, *NFKBIB*, *BCL2L1*, *IL10RB*, *IFNGR2*, *RUNX1*, *IL1RAPL1*, *BTK*, *IRAK1*, and *IKBKG*.

The polymorphism IDs are available from the corresponding author upon request.

### Method for genotyping data QC

Before genotyping, a Y-chromosome test assay was performed for all samples. Sex results of this assay were compared with clinical data, and only samples with concordance in sex assignment were selected for genotyping. DNA samples genotyped using the Illumina standard arrays or custom arrays and with call rates <99% or <95%, respectively, were re-genotyped. Re-assayed samples with call rates consistently below the threshold were removed from the analysis. Sample pairs with kinship coefficient  $\geq 0.5$  were

1  
2  
3 excluded. Markers with call rates <95% were individually reviewed and re-clustered. The quality of  
4  
5 markers with call rates  $\geq 95\%$  was assessed using Infinium genotyping QC metrics (Illumina). Single-  
6  
7 nucleotide polymorphisms (SNPs) with either >5% missing data or with a minor allele frequency <1% were  
8  
9 excluded from the analysis. Chi-square tests of Hardy-Weinberg equilibrium were conducted in white  
10  
11 patients; the results were used, along with estimates of minor allele frequency, to assist in the interpretation  
12  
13 of associations.

### 14 15 16 17 18 **Method for DNA and RNA sample preparation**

19  
20 DNA was extracted from EDTA whole blood using a silica gel-based extraction method (MagNA Pure LC  
21  
22 DNA Isolation KIT I, Roche Molecular Systems). DNA was quantified by picogreen fluorescence  
23  
24 measurement (Quant-It DNA Assay kit, Invitrogen) and normalized to 50 ng/ul.

25  
26  
27  
28 Total RNA was prepared from whole blood collected in paxgene tubes using a Qiagen BioRobot MDx.  
29  
30 RNA was quantified by ribogreen fluorescence measurement (Quant-It Ribogreen RNA Assay kit,  
31  
32 Invitrogen) and normalized to 100 ng/ul.

### 33 34 35 36 **Method for gene expression data QC**

37  
38 Quality control metrics on MAS5 normalized data, box plots, MvA plots, and principal component analyses  
39  
40 were performed using the Bioconductor QC method; 11 chips were identified as having poor quality. Five  
41  
42 samples were further excluded because of missing Disease Activity Score using 28 joints (DAS28)  
43  
44 erythrocyte sedimentation rate (ESR) data at baseline or week 16.  
45  
46  
47  
48  
49  
50  
51  
52  
53  
54  
55  
56  
57  
58  
59  
60

**Supplementary Table 1.** SNPs on IL-6 and IL-6R SNPs in the primary analysis and the pair-wise linkage disequilibrium coefficient ( $R^2$ ) based on data from HapMap22.

| Gene: IL6, Chromosome 7 |            |                  | Pair-wise $R^2$ |           |           |           |           |           |           |           |            |
|-------------------------|------------|------------------|-----------------|-----------|-----------|-----------|-----------|-----------|-----------|-----------|------------|
| SNP ID                  | Position   | Function         | rs1270038       | rs2069833 | rs2069837 | rs2066992 | rs2069840 | rs1554606 | rs2069845 | rs2069861 | rs10242595 |
| rs12700386              | 22,729,534 | 5' upstream      |                 |           |           |           |           |           |           |           |            |
| rs2069833               | 22,734,189 | Intronic         | 0.134           |           |           |           |           |           |           |           |            |
| rs2069837               | 22,734,552 | Intronic         | 0.021           | 0.079     |           |           |           |           |           |           |            |
| rs2066992               | 22,734,774 | Intronic         | 0.013           | 0.048     | 0.003     |           |           |           |           |           |            |
| rs2069840               | 22,735,097 | Intronic         | 0.333           | 0.512     | 0.033     | 0.02      |           |           |           |           |            |
| rs1554606               | 22,735,232 | Intronic         | 0.149           | 0.935     | 0.084     | 0.051     | 0.548     |           |           |           |            |
| rs2069845               | 22,736,674 | Intronic         | 0.149           | 0.935     | 0.084     | 0.051     | 0.548     | 1         |           |           |            |
| rs2069861               | 22,738,179 | 3'<br>downstream | 0.021           | 0.065     | 0.005     | 0.003     | 0.033     | 0.06      | 0.06      |           |            |
| rs10242595              | 22,740,756 | 3'<br>downstream |                 | 0.146     | 0.235     | 0.143     | 0.006     | 0.162     | 0.162     | 0.022     |            |
| rs11766273              | 22,742,188 | 3'<br>downstream |                 | 0.11      | 0.009     | 0.005     | 0.056     | 0.103     | 0.103     | 0.009     | 0.037      |

| Gene IL-6R, Chromosome 1 |             |          | Pair-wise $R^2$ |           |           |           |           |           |           |           |           |           |           |           |           |           |           |         |
|--------------------------|-------------|----------|-----------------|-----------|-----------|-----------|-----------|-----------|-----------|-----------|-----------|-----------|-----------|-----------|-----------|-----------|-----------|---------|
| SNP ID                   | Position    | Function | rs1386821       | rs4075015 | rs6684439 | rs4845618 | rs8192282 | rs7549250 | rs4553185 | rs4845623 | rs4537545 | rs4129267 | rs8192284 | rs1126561 | rs4329505 | rs4240872 | rs4509570 | rs22292 |
| rs1386821                | 152,648,673 | Intronic |                 |           |           |           |           |           |           |           |           |           |           |           |           |           |           |         |
| rs4075015                | 152,655,820 | Intronic | 0.169           |           |           |           |           |           |           |           |           |           |           |           |           |           |           |         |
| rs6684439                | 152,662,463 | Intronic | 0.012           | 0.04      |           |           |           |           |           |           |           |           |           |           |           |           |           |         |
| rs4845618                | 152,666,639 | Intronic | 0.003           | 0.028     | 0.033     |           |           |           |           |           |           |           |           |           |           |           |           |         |
| rs8192282                | 152,668,303 | Intronic | 0.008           | 0.011     | 0.013     | 0.219     |           |           |           |           |           |           |           |           |           |           |           |         |
| rs7549250                | 152,670,960 | Intronic | 0.001           | 0.013     | 0.029     | 0.905     | 0.198     |           |           |           |           |           |           |           |           |           |           |         |
| rs4553185                | 152,677,579 | Intronic | 0.001           | 0.013     | 0.029     | 0.905     | 0.198     | 1         |           |           |           |           |           |           |           |           |           |         |
| rs4845623                | 152,682,401 | Intronic | 0.009           | 0.048     | 0.07      | 0.411     | 0.085     | 0.504     | 0.504     |           |           |           |           |           |           |           |           |         |
| rs4537545                | 152,685,503 | Intronic | 0.003           | 0.042     | 0.073     | 0.393     | 0.082     | 0.486     | 0.486     | 0.964     |           |           |           |           |           |           |           |         |

1  
2  
3  
4  
5  
6  
7  
8  
9  
10  
11  
12  
13  
14  
15  
16  
17  
18  
19  
20  
21  
22  
23  
24  
25  
26  
27  
28  
29  
30  
31  
32  
33  
34  
35  
36  
37  
38  
39  
40  
41  
42  
43  
44  
45  
46  
47  
48  
49

|            |             |                  |       |       |       |       |       |       |       |       |       |       |       |       |       |       |       |     |  |
|------------|-------------|------------------|-------|-------|-------|-------|-------|-------|-------|-------|-------|-------|-------|-------|-------|-------|-------|-----|--|
| rs4129267  | 152,692,888 | Intronic         | 0.003 | 0.042 | 0.073 | 0.393 | 0.082 | 0.486 | 0.486 | 0.964 | 1     |       |       |       |       |       |       |     |  |
| rs8192284  | 152,693,594 | Intronic         | 0.002 | 0.034 | 0.07  | 0.368 | 0.085 | 0.455 | 0.455 | 0.928 | 0.964 | 0.964 |       |       |       |       |       |     |  |
| rs11265618 | 152,696,716 | Intronic         | 0.005 | 0.011 | 0.012 | 0.194 | 0.887 | 0.176 | 0.176 | 0.101 | 0.098 | 0.098 | 0.101 |       |       |       |       |     |  |
| rs4329505  | 152,699,044 | Intronic         | 0.005 | 0.011 | 0.012 | 0.194 | 0.887 | 0.176 | 0.176 | 0.101 | 0.098 | 0.098 | 0.101 | 1     |       |       |       |     |  |
| rs4240872  | 152,702,819 | Intronic         | 0.043 | 0.095 | 0.009 | 0.316 | 0.071 | 0.356 | 0.356 | 0.18  | 0.205 | 0.205 | 0.18  | 0.087 | 0.087 |       |       |     |  |
| rs4509570  | 152,703,008 | Intronic         | 0.043 | 0.095 | 0.009 | 0.316 | 0.071 | 0.356 | 0.356 | 0.18  | 0.205 | 0.205 | 0.18  | 0.087 | 0.087 | 1     |       |     |  |
| rs2229238  | 152,704,520 | 3' UTR           | 0.026 | 0.034 | 0.004 | 0.254 | 0.074 | 0.285 | 0.285 | 0.125 | 0.148 | 0.148 | 0.155 | 0.066 | 0.066 | 0.752 | 0.752 |     |  |
| rs7514452  | 152,704,708 | 3' UTR           | 0.028 | 0.027 | 0.005 | 0.23  | 0.077 | 0.26  | 0.26  | 0.105 | 0.126 | 0.126 | 0.132 | 0.068 | 0.068 | 0.715 | 0.715 | 0.9 |  |
| rs7526293  | 152,710,833 | 3'<br>downstream | 0.022 | 0.021 | 0.003 | 0.228 | 0.068 | 0.256 | 0.256 | 0.111 | 0.134 | 0.134 | 0.139 | 0.06  | 0.06  | 0.688 | 0.688 | 0.9 |  |

IL-6=interleukin-6; IL-6R=IL-6 receptor; SNP=single nucleotide polymorphism.

**Supplementary Table 2.** Association of baseline markers with treatment response measured by change in DAS28 from baseline at week 16.

| Serum protein markers |             |                 |                |          |         |         |         |
|-----------------------|-------------|-----------------|----------------|----------|---------|---------|---------|
|                       |             | Pooled DMARD-IR |                | AMBITION |         | RADIATE |         |
|                       |             | TCZ             | Placebo        | TCZ      | Placebo | TCZ     | Placebo |
| IL-6                  | n           | 1547            | 781            | 207      | 204     | 214     | 116     |
|                       | $\beta$     | -0.17           | 0.12           | -0.22    | 0.07    | -0.16   | 0.22    |
|                       | SE          | 0.04            | 0.05           | 0.11     | 0.11    | 0.10    | 0.13    |
|                       | p           | <0.0001         | 0.011          | 0.04     | 0.49    | 0.12    | 0.08    |
| sIL-6R                | n           | 1772            | 897            | 247      | 250     | 287     | 144     |
|                       | $\beta$     | 0.04            | 0.01           | 0.03     | -0.01   | 0.11    | -0.04   |
|                       | SE          | 0.03            | 0.05           | 0.13     | 0.14    | 0.11    | 0.14    |
|                       | p           | 0.19            | 0.77           | 0.80     | 0.97    | 0.32    | 0.76    |
| Primary RNA markers   |             |                 |                |          |         |         |         |
| Gene                  | Probe set   | RADIATE         |                |          |         |         |         |
|                       |             | TCZ<br>8 mg/kg  | TCZ<br>4 mg/kg | Placebo  |         |         |         |
| IL-6R                 | 205945_at   | n               | 76             | 75       | 66      |         |         |
|                       |             | $\beta$         | -0.1           | 0.06     | -0.03   |         |         |
|                       |             | SE              | 0.17           | 0.15     | 0.17    |         |         |
|                       |             | p               | 0.53           | 0.68     | 0.86    |         |         |
|                       | 217489_s_at | n               | 76             | 75       | 66      |         |         |
|                       |             | $\beta$         | -0.14          | 0.06     | 0.09    |         |         |
|                       |             | SE              | 0.19           | 0.14     | 0.14    |         |         |
|                       |             | p               | 0.47           | 0.68     | 0.53    |         |         |
|                       | 226333_at   | n               | 76             | 75       | 66      |         |         |
|                       |             | $\beta$         | 0.03           | 0.11     | 0.28    |         |         |
|                       |             | SE              | 0.19           | 0.12     | 0.17    |         |         |
|                       |             | p               | 0.87           | 0.39     | 0.12    |         |         |

$\beta$ =regression coefficient, representing the difference in DAS28 corresponding to each copy of minor allele; DAS28=Disease Activity Score using 28 joints; DMARD=disease-modifying anti-rheumatic drug; IL-6R=interleukin-6 receptor; IL-6ST=IL-6 signal transducer; IR=inadequate responder; sIL-6R=soluble IL-6R; TCZ=tocilizumab.

Baseline DAS28 and TCZ dose were included in the model as covariates. Among the seven-probe set in IL-6ST, no association was found. All estimated  $\beta$  values were <0.3



**Supplementary Figure 1.** Scatter plots showing correlations between the variables.  
(A) Pair-wise scatter plot of the three serum IL-6 assays on baseline samples in the TOWARD study. Spearman rank correlation coefficient and sample size are shown in the upper panel.

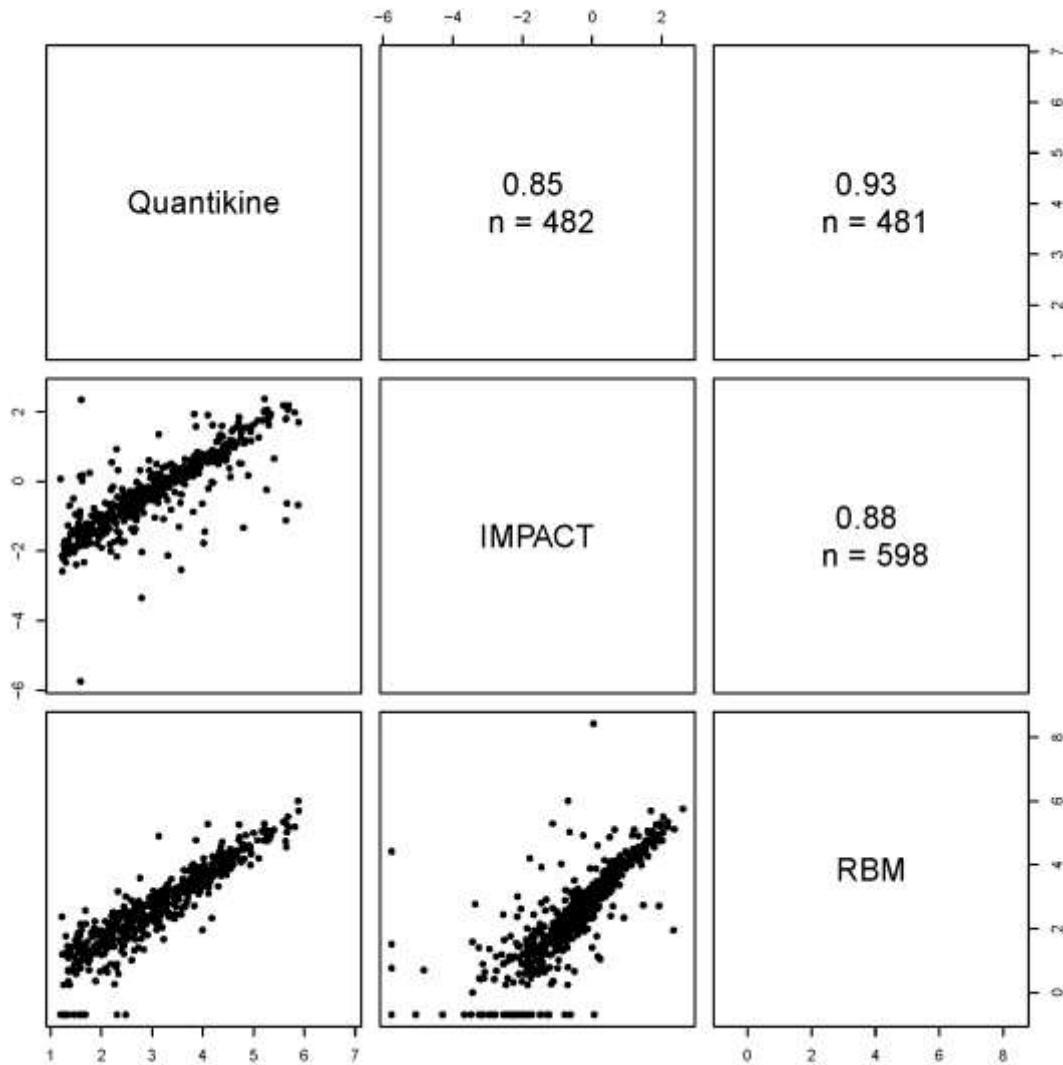

IL-6=interleukin-6; RBM=Rules-Based Medicine assay.

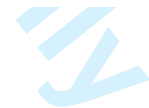

(B) Pair-wise scatter plots between DAS28, CRP, serum IL-6, and serum sIL-6R. Pearson correlation coefficients are labelled in the upper panel.

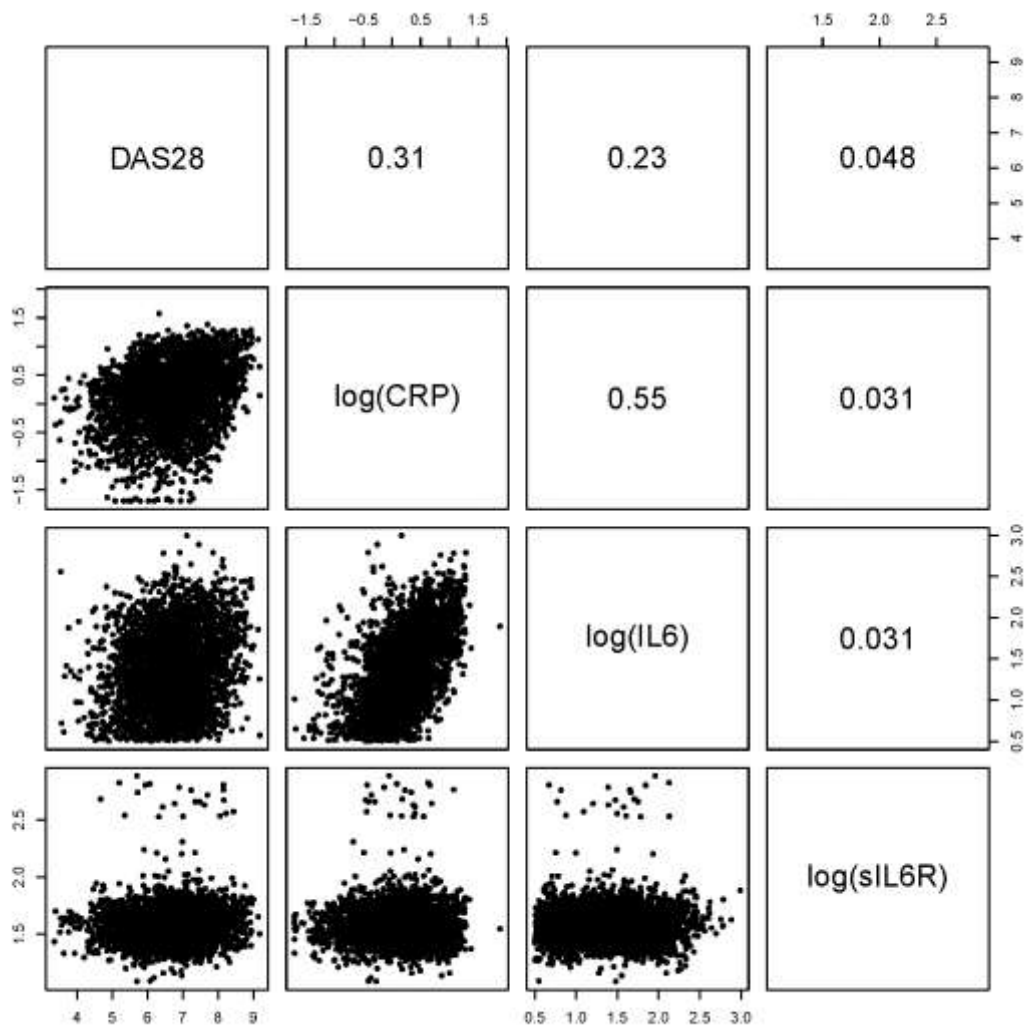

CRP=C-reactive protein; DAS28=Disease Activity Score at 28 joints; IL-6=interleukin-6; IL-6R=interleukin-6 receptor; sIL-6R=soluble interleukin-6 receptor.

(C) Scatter plot of change in DAS at week 16 versus baseline in tocilizumab-treated patients in the TOWARD study.

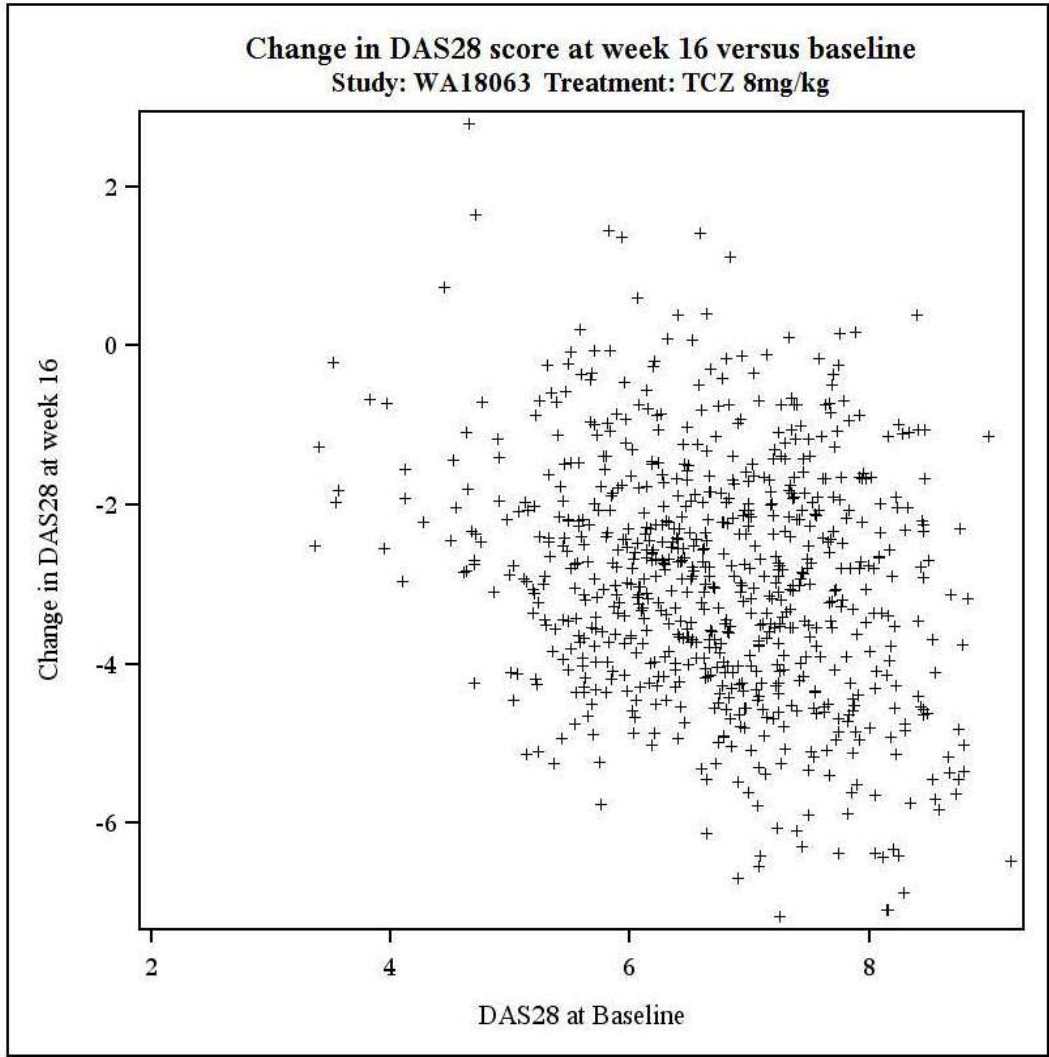

DAS=Disease Activity Score; DAS28=Disease Activity Score at 28 joints.

only

**Supplementary Figure 2.** Sampling time (hour of day) for baseline IL-6 samples in all studies (N = 3,143).

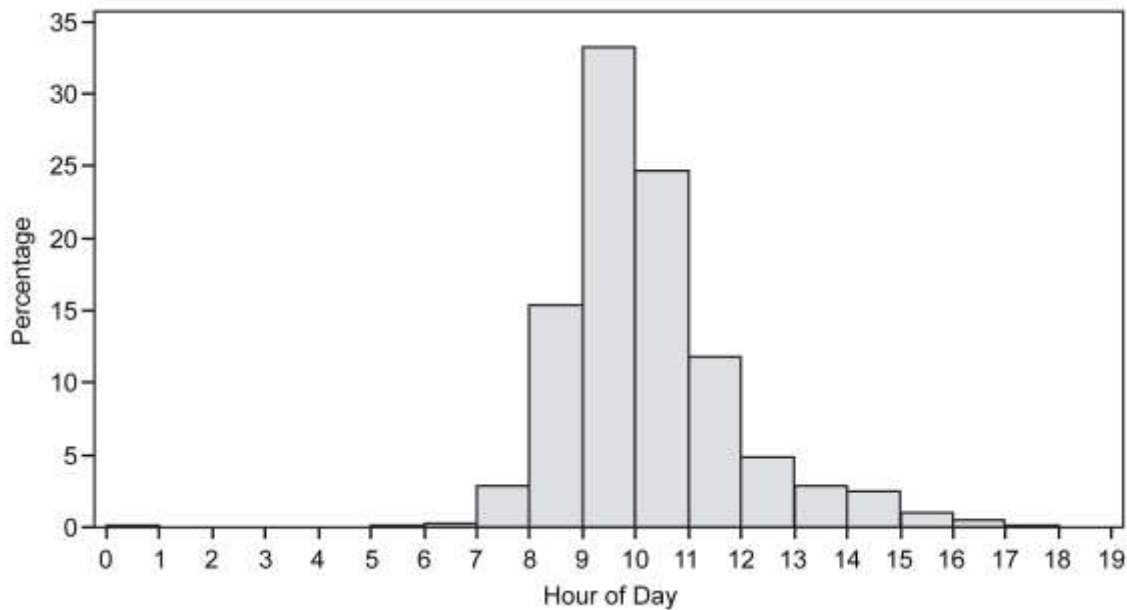

For review only

1  
2  
3  
4  
5  
6  
7  
8  
9  
10  
11  
12  
13  
14  
15  
16  
17  
18  
19  
20  
21  
22  
23  
24  
25  
26  
27  
28  
29  
30  
31  
32  
33  
34  
35  
36  
37  
38  
39  
40  
41  
42  
43  
44  
45  
46  
47  
48  
49  
50  
51  
52  
53  
54  
55  
56  
57  
58  
59  
60

**Supplementary Figure 3.** Association of serum IL-6 concentration with response to treatment in patients who were rheumatoid factor positive at baseline.

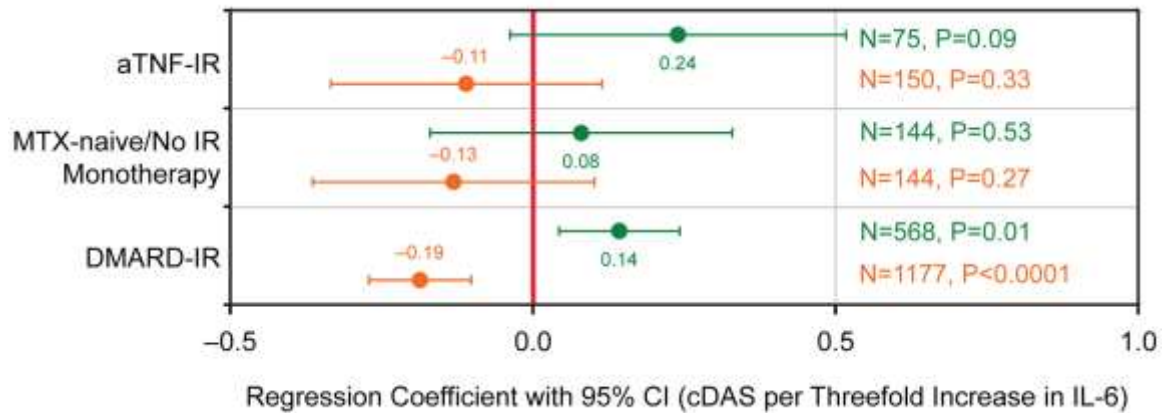

•, MTX/DMARD; •, TCZ+MTX/DMARD.

Forest plots show the effect and 95% CI for the association of IL-6 with cDAS28 at 16 weeks across treatment lines.

cDAS28, change in DAS28 from baseline at week 16; CI, confidence interval; DMARD, disease-modifying antirheumatic drug; IL-6, interleukin-6; MTX, methotrexate; SD, standard deviation; TCZ, tocilizumab; TNF, tumour necrosis factor.

1  
2  
3  
4  
5  
6  
7  
8  
9  
10  
11  
12  
13  
14  
15  
16  
17  
18  
19  
20  
21  
22  
23  
24  
25  
26  
27  
28  
29  
30  
31  
32  
33  
34  
35  
36  
37  
38  
39  
40  
41  
42  
43  
44  
45  
46  
47  
48  
49  
50  
51  
52  
53  
54  
55  
56  
57  
58  
59  
60

**IL-6 pathway–driven investigation of response to IL-6 receptor inhibition in  
rheumatoid arthritis**

Jianmei Wang, PhD,<sup>1\*</sup> Adam Platt, PhD,<sup>1,\*</sup> Ruchi Upmanyu, MSc,<sup>1</sup> Søren Germer, PhD,<sup>2</sup>  
Guiyuan Lei, PhD,<sup>1</sup> Christina Rabe, PhD,<sup>3</sup> Ryma Benayed, PhD,<sup>2</sup> Andrew Kenwright,  
BA,<sup>1</sup> Andrew Hemmings, BA,<sup>4</sup> Mitchell Martin, PhD<sup>2</sup> and Olivier Harari, MD, PhD<sup>1</sup>

<sup>1</sup>Roche Products Ltd, Welwyn Garden City, United Kingdom; <sup>2</sup>Roche, Nutley, New  
Jersey, USA; <sup>3</sup>Roche Diagnostics GmbH, Penzberg, Germany; <sup>4</sup>Genentech (a member of  
the Roche group), South San Francisco, California, USA

\*These authors contributed equally to this work.

**Correspondence to**

Olivier Harari, MD  
Roche Products Ltd  
6 Falcon Way  
Welwyn Garden City, AL7 1TW, United Kingdom  
Telephone: +44 01707 366167  
Fax: 0044 1707 36 5887  
Email: olivier.harari@roche.com

**Running title:** IL-6 pathway and tocilizumab response

**Funding:** This study was funded by Roche. Support for third-party writing assistance for  
this manuscript was provided by F. Hoffmann-La Roche Ltd.

1  
2  
3 **Word count:** 3,496 (4,000 words maximum)  
4

5 **References:** 32  
6

7  
8 **Tables:** 4  
9

10 **Figures:** 1 (colour)  
11

12 **Supplementary material:** 2 tables, 3 figures  
13  
14

15  
16  
17  
18 **Keywords:** rheumatoid arthritis; tocilizumab; biomarkers  
19

20  
21  
22 **Primary subject heading:** Rheumatology  
23

24  
25 **Secondary subject heading:** Immunology  
26  
27

### 28 29 30 31 32 33 **Clinical Trials Information**

34  
35  
36 Registration names and numbers of tocilizumab clinical trials on Clinicaltrials.gov are

37  
38 OPTION NCT00106548, TOWARD NCT00106574, RADIATE NCT00106522,

39  
40 AMBITION NCT00109408, LITHE NCT00106535 and MEASURE NCT00535782.  
41  
42  
43  
44  
45  
46  
47  
48  
49  
50  
51  
52  
53  
54  
55  
56  
57  
58  
59  
60

1  
2  
3 **ABSTRACT** (261 words; maximum, 300)  
4

5 **Objectives** To determine whether heterogeneity in interleukin-6 ( IL-6), IL-6 receptor  
6 and other components of the IL-6 signalling pathway/network, at the gene, transcript and  
7  
8 protein levels, correlates with disease activity in patients with rheumatoid arthritis (RA)  
9  
10 and with clinical response to tocilizumab.  
11  
12

13 **Design** Biomarker samples and clinical data for five phase 3 trials of tocilizumab were  
14  
15 analysed using serum (3,751 samples), genotype (927 samples) and transcript (217  
16  
17 samples) analyses. Linear regression was then used to assess the association between  
18  
19 these markers and either baseline disease activity or treatment response.  
20  
21  
22

23 **Results** Higher baseline serum IL-6 levels were significantly associated ( $P<0.0001$ ) with  
24  
25 higher baseline DAS28, ESR, CRP and HAQ in patients who had inadequate responses to  
26  
27 disease-modifying anti-rheumatic drugs (DMARD-IR), patients who had inadequate  
28  
29 responses to anti-tumour necrosis factor (aTNF-IR) and patients who were  
30  
31 naive/responders to MTX. Higher baseline serum IL-6 levels were also significantly  
32  
33 associated with better clinical response to tocilizumab (versus placebo) measured by  
34  
35 cDAS28 in the pooled DMARD-IR ( $P<0.0001$ ) and MTX-naive populations ( $P=0.04$ ).  
36  
37 However, the association with treatment response was weak. A threefold difference in  
38  
39 baseline IL-6 level corresponded to only a 0.17-unit difference in DAS28 at week 16. IL-  
40  
41 6 pathway SNPs and RNA levels also were not strongly associated with treatment  
42  
43 response.  
44  
45  
46  
47  
48  
49

50 **Conclusions** Our analyses illustrate that the biological activity of a disease-associated  
51  
52 molecular pathway may impact the benefit of a therapy targeting that pathway. However,  
53  
54 the variation in pathway activity, as measured in blood, may not be a strong predictor.  
55  
56  
57  
58  
59  
60



1  
2  
3 These data suggest that the major contribution to variability in clinical responsiveness to  
4 therapeutics in RA remains unknown.  
5  
6  
7

## 8 9 **Article Summary**

### 10 11 12 13 **Article focus**

- 14  
15 • This study aimed to determine whether genetic polymorphism and heterogeneity  
16 in expression of IL-6 pathway/network components could explain the variability  
17 in baseline disease activity and clinical response to tocilizumab in patients with  
18 RA  
19  
20  
21  
22  
23  
24

### 25 26 **Key messages**

- 27  
28 • Higher baseline serum IL-6 levels were significantly associated with higher  
29 baseline disease activity (ESR, CRP, DAS28 and HAQ scores) in large  
30 populations of methotrexate-naive, DMARD-IR and aTNF-IR patients with RA.  
31 Higher baseline serum IL-6 levels also showed significant correlation with better  
32 clinical response to tocilizumab (cDAS28) in DMARD-IR and MTX-naive RA  
33 patients; however, the effect size was small, limiting the clinical usefulness of the  
34 marker in predicting treatment benefit. A threefold higher baseline IL-6  
35 concentration corresponded to only an additional 0.17-unit decrease in DAS28  
36 score in the DMARD-IR patients treated with tocilizumab  
37  
38  
39  
40  
41  
42  
43  
44  
45  
46  
47  
48  
49
- 50 • None of the genetic polymorphisms in IL-6 or IL-6R showed any association with  
51 treatment response to tocilizumab  
52  
53  
54
- 55 • No strong predictor of tocilizumab treatment response was identified; thus, the  
56 major factors underlying the patient-to-patient variability in clinical  
57  
58  
59  
60

1  
2  
3 responsiveness to RA therapies remains unknown. This study illustrated well the  
4  
5 difficulty of identifying clinically useful predictive biomarkers in a complex  
6  
7 chronic disease  
8  
9

### 10 11 12 **Strengths and limitations of this study**

- 13  
14  
15 • This study included well-characterised RA patients from five large phase 3  
16  
17 controlled clinical trials. Biomarker data were available for more than 3,700  
18  
19 patients. The extensive collection of RNA, DNA and serum samples allowed  
20  
21 thorough investigation of the target-related heterogeneity  
22  
23
- 24  
25 • This is the first demonstration of a significant association between baseline serum  
26  
27 IL-6 levels and baseline disease activity in a large population of patients with RA,  
28  
29 extending earlier findings of elevated serum IL-6 levels in RA patients compared  
30  
31 with healthy controls  
32  
33
- 34  
35 • The current biomarker analysis is focused on clinical usefulness and included only  
36  
37 blood samples. Any potentially useful information about local regulation of IL-6  
38  
39 pathway gene transcription and protein level in tissues involved in RA could not  
40  
41 be obtained  
42  
43  
44  
45  
46  
47  
48  
49  
50  
51  
52  
53  
54  
55  
56  
57  
58  
59  
60

## INTRODUCTION

Interleukin-6 (IL-6) is a pleiotropic cytokine important in autoimmune diseases, including rheumatoid arthritis (RA).<sup>1</sup> High concentrations of IL-6 are found in the synovial fluid and sera of patients with RA. IL-6 involvement in RA pathogenesis includes involvement in B-cell proliferation and cytokine production, matrix metalloproteinase expression, acute-phase response and anaemia.<sup>2</sup>

IL-6 signal transduction occurs through either a classical (*cis*-) or a *trans*-signalling pathway. In *cis*-signalling, IL-6 binds to membrane-bound IL-6 receptor alpha (mIL-6R $\alpha$ ) before forming a trimer with gp130 (encoded by IL-6 signal transducer [*IL-6ST*]). A signalling complex is formed when this heterotrimer forms a dimer with another IL-6/mIL-6R/gp130 complex.<sup>1</sup> However, though gp130 is ubiquitously expressed, mIL-6R expression is restricted to hepatocytes and a subset of leukocytes. The *trans*-signalling pathway makes use of a soluble form of IL-6R (sIL-6R), to which IL-6 binds before forming a heterodimer with membrane-bound gp130, allowing cells that do not express mIL-6R to be activated by IL-6.<sup>1</sup>

Studies of tocilizumab,<sup>3-8</sup> a humanised monoclonal antibody targeted to IL-6R (membrane and soluble) that inhibits the interaction of IL-6 with its receptor, have shown meaningful amelioration of RA. However, the response is heterogeneous, consistent with the responses of other RA therapies. In a pooled analysis of patients who were inadequate responders to disease-modifying anti-rheumatic drug (DMARD-IR) in pivotal trials, 39% of those receiving 8 mg/kg tocilizumab for 24 weeks failed to achieve American College

1  
2  
3 of Rheumatology (ACR) 20 response (a 20% improvement), whereas 18% did achieve  
4  
5 ACR70 response (a 70% improvement). Therefore, there is great interest in discovering  
6  
7 biomarkers to aid in physician decision-making by the accurate prediction of clinical  
8  
9 response in individual patients.  
10  
11

12  
13  
14  
15 IL-6 and IL-6R levels vary in the sera of RA patients.<sup>9,10</sup> It has been suggested that some  
16  
17 of this heterogeneity is genetically determined. The rs8192284 A/C polymorphism is  
18  
19 found at the cleavage site of *mIL-6R* (Gln 357/Asp358) and has been associated with  
20  
21 increased sIL-6R levels and RA susceptibility,<sup>11,12</sup> whereas a polymorphism at -174 in  
22  
23 the promoter region of *IL-6* (rs1800795) affects transcription activity and, thus, serum  
24  
25 levels of IL-6.<sup>13</sup> Beyond RA, IL-6R polymorphisms that reduce cardiovascular risk<sup>14,15</sup>  
26  
27 attenuate classical IL-6 signalling by increasing the cleavage rate of mIL-6R (rs2228145  
28  
29 and rs8192284) and mirror the effects of tocilizumab on levels of IL-6 (increase), C-  
30  
31 reactive protein (CRP) and fibrinogen (decrease). In asthma, the rs4129267  
32  
33 polymorphism in IL-6R was found to be associated with increased risk, and Ferreira et  
34  
35 al<sup>16</sup> suggested that an IL-6R antagonist may show efficacy in asthma in a genotype-  
36  
37 dependent manner. The aim of this study was to determine whether baseline  
38  
39 heterogeneity in IL-6, IL-6R and other components of the IL-6 signalling  
40  
41 pathway/network, at the gene, transcript and protein levels, correlates with disease  
42  
43 activity in RA and clinical response to tocilizumab.  
44  
45  
46  
47  
48  
49  
50  
51  
52  
53  
54  
55  
56  
57  
58  
59  
60

## METHODS

### Patients and samples

Serum specimens used in this study were collected from five pivotal phase 3 studies of tocilizumab in patients with RA: RADIATE,<sup>4</sup> OPTION,<sup>3</sup> TOWARD,<sup>5</sup> AMBITION<sup>6</sup> and LITHE<sup>7</sup> (Table 1). At baseline, serum samples were taken pre-dose and at fasting per protocol, resulting in the vast majority of them collected in the morning. The distribution of the sampling times is shown in Supplementary Figure 2. DNA samples were from RADIATE, OPTION and TOWARD, and RNA samples were from RADIATE. These trials evaluated tocilizumab (4 mg/kg or 8 mg/kg), administered every 4 weeks over a period of 24 weeks or longer, compared with placebo. The study populations differed according to background therapy with methotrexate (MTX) (OPTION, LITHE, RADIATE), any DMARD (TOWARD) or no DMARD (AMBITION). They also differed according to previous inadequate response to anti-tumour necrosis factor (aTNF) agents (RADIATE), MTX (OPTION, TOWARD, LITHE) or neither (AMBITION). In all studies, oral corticosteroids ( $\leq 10$  mg/day prednisone or equivalent) were permitted if the dose was stable for at least 6 weeks before baseline. The study protocols were approved by relevant institutional review boards or ethics committees, and written informed consent was obtained from each patient. The studies were carried out in full concordance with the principles of the Declaration of Helsinki and with the laws and regulations of the country in which the research was conducted. DNA and RNA samples were collected only from patients who gave separate informed consent. DNA and RNA extraction methods are described in the Supplementary Material.

### Serum analysis for IL-6 and sIL-6R

Three assays for serum IL-6 levels were used to analyse samples from TOWARD, as follows: Quantikine Human IL-6 Immunoassay (R&D Systems Inc., Minneapolis, MN), performed by Huntington Life Sciences (Huntington, UK) according to the instructions of the manufacturer (Roche Diagnostics, Penzberg, Germany) of the IL-6 assay<sup>17</sup>; IMPACT platform,<sup>18</sup> performed by Roche Diagnostics; and RBM IL-6 assay, performed by Myriad RBM (Austin, TX). Given the tight correlations among these three assays (Supplementary Figure 1A), we chose to analyse data from the Quantikine Human IL-6 Immunoassay (R&D Systems Inc.) because they were available for nearly all patients in all five core studies. The limit of detection of this IL-6 assay is 3.12 pg/ml. The assay is unaffected by the addition of recombinant human sIL-6R<sup>19</sup>; therefore, it can be assumed that the data reflect the total concentration of IL-6 (i.e. the concentration of free IL-6 plus the amount of IL-6 bound to sIL-6R).

Serum concentrations of endogenous sIL-6R were measured by Huntington Life Sciences using the Quantikine Human sIL-6R Immunoassay (R&D Systems Inc.) according to the manufacturer's instructions. The sensitivity of the sIL-6R assay is 31.2 pg/ml. Measured sIL-6R concentrations are insensitive to the addition of recombinant human IL-6 but are sensitive to the presence of tocilizumab.<sup>20</sup> Therefore, it can be assumed that the sIL-6R data presented reflect the total amount of free sIL-6R plus sIL-6R complexed with IL-6 plus (in samples that contain tocilizumab) an unquantified fraction of sIL-6R bound by tocilizumab.

## Genotyping

DNA samples were genotyped using HumanHap550k BeadChip version 3.0 (Illumina, San Diego, CA) and custom chips using the OPA genotyping assay. **Quality control (QC) methods for DNA samples and genotyping data are described in the Supplementary Material. High-quality markers with call rates  $\geq 95\%$  were included in the analysis.** To reduce the multiplicity of hypothesis testing, a targeted approach was taken. Three groups of genes were considered in this analysis. Tier 1 markers consisted of 26 polymorphisms within the *IL-6* and *IL-6R* regions (Supplementary Table 1). **Ten SNPs were selected in the *IL-6* region, which is defined as 5 kb upstream and 5 kb downstream of the transcription coordinate; the SNPs cover a region of 12.6 kb. Similarly, 18 SNPs were selected in the *IL-6R* region, covering a region of 62.2 kb.** The association of these markers with treatment benefit represents primary hypotheses. Tier 2 markers consisted of 233 polymorphisms within 22 genes identified as in the *IL-6* pathway, termed the *IL-6* canonical pathway (Supplementary Material). Tier 3 markers consisted of 1,005 polymorphisms in 67 genes, identified with GeneGo (Carlsbad, CA) software, related to *IL-6* signalling, herein termed the *IL-6* network (Supplementary Material). Markers for tiers 2 and 3 correspond to the decreasing strength of the hypothesis and the increasing dimensions compared with tier 1 markers. This approach provides greater power in the confirmatory analysis for the primary biomarker hypothesis yet allows for focused exploratory analysis to address the secondary hypotheses.

**Polymerase chain reaction (PCR)-based HLA-DRB1 typing was performed on the DNA samples independently of the genotyping using whole genome and custom arrays. The**

1  
2  
3 number of shared epitope alleles (0, 1 or 2) was determined for each patient based on his  
4  
5 or her HLA-DRB1 genotype.  
6  
7  
8  
9

### 10 11 **Transcript analysis**

12  
13  
14 Two hundred thirty-three RNA samples, prepared from whole blood, at baseline were  
15  
16 analysed using the GeneChip<sup>®</sup> Human Genome U133 Plus 2.0 Array (Affymetrix, Santa  
17  
18 Clara, CA). After samples that failed quality control tests were removed (Supplementary  
19  
20 Material), data for the remaining 217 samples were normalised using the Robust Multi-  
21  
22 Array Analysis normalisation<sup>21</sup> (Bioconductor). Transcripts for *IL-6*, *IL-6R* and *IL-6ST*  
23  
24 were extracted from the normalised data. *IL-6* transcript levels were not analysed because  
25  
26 of the low levels of signal observed. Three probe sets targeting *IL-6R* were analysed. Of  
27  
28 those, 205945\_at and 217489\_at expression levels were found to be strongly correlated  
29  
30 (Pearson's  $r^2=0.75$ ), and the third probe set, 226333\_at, had a weaker correlation with the  
31  
32 other two (Pearson's  $r^2=0.34$  and  $r^2=0.38$ ). These three probe sets represent the primary  
33  
34 hypothesis in RNA transcripts. In addition, seven probe sets from *IL-6ST* were analysed  
35  
36 as secondary markers.  
37  
38  
39  
40  
41  
42  
43  
44  
45

### 46 **Measures of disease activity and clinical response**

47  
48 Six different measures were used for disease activity at baseline: erythrocyte  
49  
50 sedimentation rate (ESR), CRP, swollen joint count at 28 joints (SJC28), tender joint  
51  
52 count at 28 joints (TJC28) and Health Assessment Questionnaire (HAQ), with disease  
53  
54 activity at 28 joints (DAS28; derived from the four core components of ESR, SJC, TJC  
55  
56 and patient global assessment) considered the primary end point. As a measurement of  
57  
58  
59  
60



1  
2  
3 treatment response, change in DAS28 from baseline at week 16 (cDAS28) was mainly  
4 used. Unlike dichotomous responder criteria (e.g. ACR response, DAS28 remission and  
5 clinical disease activity index remission), this continuous measure captures the range of  
6 individual responses and is therefore more sensitive in detecting the effect of biomarkers  
7 across different levels of prevalence. In all studies except AMBITION, patients were  
8 allowed to enter escape therapy at 16 weeks if they had inadequate responses. Therefore,  
9 cDAS28 was used at week 16 to increase the sample size and to minimise bias.  
10  
11  
12  
13  
14  
15  
16  
17  
18  
19  
20  
21  
22

### 23 **Statistical analysis**

24  
25 Table 2 provides a summary of all markers analysed. Quality control analyses were  
26 performed for genotyping and gene expression data, as described in the Supplementary  
27 Material; assays and samples with poor data quality were removed. Distribution was  
28 assessed for each marker, and appropriate transformation was applied before further  
29 analysis. Minor allele frequencies and Hardy-Weinberg equilibrium were calculated for  
30 single nucleotide polymorphisms (SNPs). Given that the distribution within each gene  
31 expression probe set was approximately normal, no further transformation was applied.  
32 Log transformation was applied to the protein markers IL-6 and sIL-6R because of the  
33 skewed distribution of raw values.  
34  
35  
36  
37  
38  
39  
40  
41  
42  
43  
44  
45  
46  
47  
48

49 Correlations among the baseline markers were assessed within each sample type to  
50 enable understanding of the amount of information shared among the assays. For SNPs,  
51 linkage disequilibrium coefficients within IL-6 and IL-6R were obtained from HapMap  
52 22 based on the CEU (Utah residents of Northern and Western European ancestry from  
53  
54  
55  
56  
57  
58  
59  
60

1  
2  
3 the CEPH collection) data. For the gene expression markers, correlation coefficients were  
4  
5 calculated among probe sets within *IL-6R* and *IL-6ST*. For the proteins, correlation was  
6  
7 calculated among the three assays for IL-6 and between IL-6 and sIL-6R. Pearson or  
8  
9 Spearman rank correlation was used as appropriate.  
10  
11

12  
13  
14  
15 Linear regression was used to assess the association between markers with baseline  
16  
17 disease activity and markers with treatment response. Because of the skewed distribution  
18  
19 of the raw values, log(ESR) and log(CRP+1) were used in the regression analysis. All  
20  
21 patients were included in the regression analysis of baseline disease activity. In the  
22  
23 regression analysis of cDAS28, separate analyses were undertaken in patients treated  
24  
25 with tocilizumab and those administered placebo. Given that baseline DAS28 is strongly  
26  
27 associated with change in DAS28 at week 16, it was included as a covariate in all models.  
28  
29 No additional covariates were included in the model. In addition, the number of shared  
30  
31 epitope alleles<sup>22</sup> (0, 1 or 2) and the tocilizumab dose were used as covariates in the  
32  
33 analysis of genetic data.  
34  
35  
36  
37  
38  
39  
40

41 The numbers of genetic markers tested were 18, 233 and 1,004, respectively, for the tier  
42  
43 1, 2 and 3 markers. In addition, six baseline end points were used on the baseline disease  
44  
45 association analysis. Analyses were undertaken in the white population and the all-patient  
46  
47 population. To adjust for multiple testing, the false discovery rate (FDR)<sup>23</sup> was calculated  
48  
49 within each tier and within the white population and the all-patient population. This FDR  
50  
51 accounted for the multiplicity of markers and the end points.  
52  
53  
54  
55  
56  
57  
58  
59  
60

1  
2  
3 To help interpret the outcome of the regression analysis and to enable direct comparison  
4 of the analysis results across all markers, consistent representations of the results were  
5 used. For continuous markers, the regression coefficients were standardised to reflect  
6 how many units of change in the end points corresponded to a difference of 1 standard  
7 deviation (SD) in the marker value. For the SNP markers, an allelic model was used (i.e.  
8 two copies of the minor allele had twice the effect of one copy). The regression  
9 coefficient corresponded to the change in end point per copy of minor allele.  
10  
11  
12  
13  
14  
15  
16  
17  
18  
19  
20  
21

## 22 RESULTS

### 23 **Baseline characteristics of patients with DNA, RNA and serum samples**

24  
25 Baseline characteristics of the patient subgroups with DNA, RNA and serum samples  
26 available are shown in Table 1. They are generally comparable to the overall population  
27 for each study. Patient ethnicity is relevant to the genetic analysis. Therefore, the  
28 proportion of patients of European ancestry (White) is shown for the DNA  
29 subpopulations. Of the 927 patients with DNA samples, 730 (79%) were of European  
30 ancestry (White) (Table 1). As expected based on treatment experience, patients from the  
31 MTX-naive or the MTX-free study had shorter disease duration, and those from the  
32 aTNF-IR study had longer disease duration. For serum markers where large sample size  
33 was available, data were analysed separately for the MTX-naive/MTX-free population,  
34 pooled DMARD-IR population and aTNF-IR population. The distribution of baseline IL-  
35 6 was similar in the rheumatoid factor–positive and –negative subpopulations ( $45.2 \pm$   
36  $60.5$  and  $41.5 \pm 60.6$  [mean  $\pm$  SD], respectively).  
37  
38  
39  
40  
41  
42  
43  
44  
45  
46  
47  
48  
49  
50  
51  
52  
53  
54  
55  
56  
57  
58  
59  
60

### Associations with baseline disease activity

Higher baseline serum IL-6 levels were significantly associated with higher baseline DAS28, ESR, CRP and HAQ in all three populations analysed, with  $P < 0.0001$  in most cases (Table 3). The strongest association was observed between CRP and IL-6, for a correlation coefficient of 0.29 to 0.36 in three populations (Supplementary Figure 1B). IL-6 was not strongly associated with SJC28 or TJC28. Baseline sIL-6R was not strongly associated with any baseline disease activity measures.

Among the baseline RNA transcripts, an association was observed between the IL-6R transcript and CRP and ESR at baseline (data not shown). No association was found with the other baseline disease activity measures. Association with CRP and ESR was also observed, to a lesser degree, for an IL-6ST transcript.

After correction for multiple testing, no significant associations were found for any of the *IL-6* or *IL-6R* polymorphisms genotyped with baseline disease activity. Of the 1,237 polymorphisms representing 22 genes in the IL-6 canonical pathway, 67 additional genes in the IL-6 network, six baseline disease activity end points and two patient populations (all-patient, white), six associations were found to have borderline significance after adjusting for multiple testing, with an FDR of approximately 5%. There were SNPs in *TOLLIP* and *RUNX1* versus ESR and SNPs in *IL1RAPL1* versus SJC and ESR. Such borderline significance meant the association should be treated as a weak hypothesis.

### Associations with clinical response to tocilizumab

Higher baseline serum IL-6 concentrations were significantly associated with better clinical response to tocilizumab but not to placebo, as measured by cDAS28 in the pooled DMARD-IR population ( $P < 0.0001$ ) (Supplementary Table 2, Figure 1). The same effect was observed in the MTX-naive population ( $P = 0.04$ ). In the aTNF-IR population, the association was not significant, partially because of the smaller sample size. In the DMARD-IR population, a threefold difference in baseline IL-6 concentration, equivalent to 1 SD in the baseline log(IL-6) distribution, corresponded to a small difference of 0.17 units in cDAS28 score at week 16. The association between serum IL-6 level and achievement of DAS28 remission (DAS28  $< 2.6$ ) was analysed using receiver operating characteristic analysis in the pooled DMARD-IR population treated with tocilizumab ( $n = 1,547$ ). The area under the curve was only 0.59, suggesting that baseline serum IL-6 levels provided very little discrimination between those achieving and those not achieving DAS28 remission. In the placebo group, the direction of association was opposite that of tocilizumab-treated patients, indicating that baseline serum IL-6 level (with no longitudinal data on change in level) is not a prognostic factor for clinical response in RA in these cohorts.

Baseline sIL-6R concentration in serum had no effect on treatment response in either the tocilizumab or the placebo group (Supplementary Table 2). IL-6R whole blood mRNA (in RADIATE) was not associated with clinical response to tocilizumab or placebo treatment (Supplementary Table 2). No *IL-6* or *IL-6R* polymorphisms were associated with cDAS28 after correction for multiple testing. Although rs2069840 and rs12700386

1  
2  
3 had a raw  $P < 0.05$  (Table 4), the estimated effect size was small. Each copy of the minor  
4  
5 allele for rs2069840 corresponded to only a 0.3-unit difference in cDAS28. Of the SNPs  
6  
7 in the canonical and the network or signalling pathway, rs973767 (an intronic SNP in  
8  
9 *PTPN2*) had the lowest P value ( $5.7 \times 10^{-5}$ ) but was not significant after correction for  
10  
11 multiple testing (FDR=0.057; Table 4). **In the rheumatoid factor–positive subpopulation,**  
12  
13 **the effect of baseline serum IL-6 on clinical response was very similar to that in the**  
14  
15 **overall population (Supplementary Figure 3).**  
16  
17  
18  
19  
20  
21

## 22 DISCUSSION

23  
24 We have investigated the associations among a number of DNA, RNA and protein  
25  
26 biomarkers directly related to IL-6 signalling (Table 2) with baseline disease activity and  
27  
28 treatment benefit from tocilizumab (Table 1). We demonstrate the modest association  
29  
30 between serum IL-6 levels and clinical disease activity as measured by DAS28 and HAQ.  
31  
32 Although serum IL-6 levels have previously been shown to be elevated in patients with  
33  
34 RA compared with controls,<sup>9,24</sup> this is the first time a significant correlation between IL-6  
35  
36 level and disease activity has been demonstrated in a large population. IL-6 level  
37  
38 accounted for only a small component of observed variance in disease activity  
39  
40 (Supplementary Table 2, Figure 1). Of the four DAS28 components, serum IL-6 level  
41  
42 was most strongly associated with ESR/CRP. This is not surprising given the pivotal role  
43  
44 of IL-6 (and the pronounced inhibitory effect of tocilizumab) on the acute-phase  
45  
46 response.<sup>25</sup> Interestingly, HAQ, a measure of patient-reported disability independent of  
47  
48 inflammation, also had a significant association with serum IL-6 level.  
49  
50  
51  
52  
53  
54  
55  
56  
57  
58  
59  
60

1  
2  
3 Littman<sup>26</sup> proposes that IL-6/tocilizumab may represent ‘low-hanging fruit’ in terms of  
4 personalised health care in RA, but our analysis suggested otherwise. Higher baseline  
5 DAS28 was associated with higher change in DAS28 in response to therapy  
6 (Supplementary Figure 1C). When change in DAS28 was corrected for baseline DAS28,  
7 only a weak association with serum IL-6 was observed. Even though IL-6 has been  
8 shown to decrease with effective treatments, such as modified-release prednisone,<sup>27</sup> in  
9 RA, we saw no evidence that a single baseline ‘snapshot’ serum IL-6 level was a general  
10 prognostic factor for clinical response in RA (i.e. predicted subsequent treatment  
11 response or disease course).  
12  
13  
14  
15  
16  
17  
18  
19  
20  
21  
22  
23  
24  
25  
26

27 Serum IL-6 exhibits a pronounced circadian rhythm.<sup>28</sup> This source of variability was  
28 minimised, but not eliminated, by collecting the samples in as narrow a time window as  
29 achievable in large clinical studies. It is possible that discordance in IL-6 signalling  
30 activity between blood and synovial tissue explains the lack of association with blood  
31 samples in our study. However, this cannot explain the negative genetic data. The lack of  
32 genetic associations between polymorphisms in *IL-6R* (including those determining sIL-  
33 6R levels) and baseline disease activity<sup>11,29</sup> shows that sIL-6R levels, though highly  
34 variable, are not appreciably different between patients who have RA and those who are  
35 healthy.<sup>30,31</sup> The effect of a genetic marker can be affected by a patient’s genetic  
36 background. An ethnically homogeneous population is ideal for genetic analysis. In this  
37 cohort, 79% of the patients were of European ancestry (White). All genetic analyses were  
38 performed in the overall population for maximum sample size and in the White  
39  
40  
41  
42  
43  
44  
45  
46  
47  
48  
49  
50  
51  
52  
53  
54  
55  
56  
57  
58  
59  
60

1  
2  
3 subpopulation for genetic homogeneity. The White subpopulation was sufficiently large;  
4  
5 therefore, the lack of a strong genetic effect is compelling.  
6  
7  
8  
9

10 Formal multiplicity adjustment was not carried out in the analysis of serum and RNA  
11 markers. However, informal assessment was used to help interpret the results of the  
12 statistical analysis. Multiplicity of the statistical testing was indicated by multiple  
13 markers and multiple end points; the numbers of markers in each sample type are shown  
14 in Table 2. Six baseline disease characteristics and one clinical response end point were  
15 used. In addition, genetic analyses were performed in the White and the overall  
16 populations. Overall,  $\geq 10$  tests were carried out for each serum and RNA marker; results  
17 with  $P < 0.0001$  would have been significant had adjustment for multiplicity been  
18 performed, and results with unadjusted  $P > 0.01$  can be regarded as likely false positives.  
19  
20  
21  
22  
23  
24  
25  
26  
27  
28  
29  
30  
31  
32  
33

34 Power assessment was not performed. Empirically, given the large sample size for DNA  
35 and serum samples, the power to detect a clinically relevant effect at  $\alpha = 0.05$  was very  
36 high. Therefore,  $P > 0.05$  can be interpreted as evidence of no effect. Analyses of RNA  
37 markers had low power because of the limited sample size.  
38  
39  
40  
41  
42  
43  
44  
45

46 Our analyses illustrate that in a disease such as RA, variation in the abundance of a  
47 therapeutic target may not be a strong predictor of patient benefit. In particular, the  
48 response to tocilizumab was not dependent on IL-6R SNPs, which were found to be  
49 associated with asthma and cardiovascular risk. In addition, a genome-wide association  
50 approach using 1,600 patients from five controlled clinical trials did not yield any strong  
51  
52  
53  
54  
55  
56  
57  
58  
59  
60



1  
2  
3 predictor to tocilizumab treatment response.<sup>32</sup> These data suggest that the major  
4  
5 contribution to variability in clinical responsiveness to therapeutics in RA remains  
6  
7 unknown, and they illustrate the challenges of identifying predictive biomarkers, even in  
8  
9 large, well-conducted studies.  
10  
11  
12  
13  
14  
15  
16  
17  
18  
19  
20  
21  
22  
23  
24  
25  
26  
27  
28  
29  
30  
31  
32  
33  
34  
35  
36  
37  
38  
39  
40  
41  
42  
43  
44  
45  
46  
47  
48  
49  
50  
51  
52  
53  
54  
55  
56  
57  
58  
59  
60

For peer review only

## Acknowledgements

We thank Stefan Palme for providing the IL-6 data measured on the IMPACT platform; Chih Jian Lih and Mickey Williams for providing the gene expression data; Yan Li for help with the gene expression data QC; **Teodorica Bugawan for providing the HLA-DRB1 and shared epitope data; Delphine Lagarde for the DNA and RNA sample preparation and the method description;** Gregg Silverman, Ann Begovich, Paul Cutler and Friedemann Krause for helpful discussions; and Santo D'Angelo, PhD, for third-party writing assistance.

This study was funded by Roche. Support for third-party writing assistance for this manuscript was provided by F. Hoffmann-La Roche Ltd.

## Competing interests

All authors are (or were at the time of the study) employees of Roche or Genentech, a member of the Roche group, and four authors (AH, AK, OH and RU) also own stock in Roche.

## Author contributions

JW designed the study, conducted research, conducted the literature search, analysed and interpreted the data and drafted the manuscript; AP designed the study, conducted research, conducted the literature search, collected data, analysed and interpreted the data, oversaw data collection and drafted the manuscript; RU analysed and interpreted the data

1  
2  
3 and drafted the manuscript; SG designed the study and collected data; GL analysed and  
4 interpreted the data; CR analysed and interpreted the data; RB designed the study,  
5  
6 collected data and analysed the data; AK analysed and interpreted the data; AH designed  
7  
8 the study and collected data; MM designed the study; OH interpreted the data and drafted  
9  
10 the manuscript.  
11  
12

13  
14  
15 All authors revised the manuscript critically for important intellectual content and  
16  
17 approved the final version for submission.  
18  
19

## 20 21 22 **Ethics approval** 23

24  
25 The study protocols were approved by relevant institutional review boards or ethics  
26  
27 committees, and written informed consent was obtained from each patient. The studies  
28  
29 were carried out in full concordance with the principles of the Declaration of Helsinki  
30  
31 and with the laws and regulations of the country in which the research was conducted.  
32  
33 DNA and RNA samples were collected only from patients who gave separate informed  
34  
35 consent.  
36  
37  
38  
39  
40  
41

## 42 **Data sharing** 43

44  
45 No additional data are available at this time.  
46  
47  
48  
49  
50  
51  
52  
53  
54  
55  
56  
57  
58  
59  
60

## References

- 1 Cronstein BN. Interleukin-6--a key mediator of systemic and local symptoms in rheumatoid arthritis. *Bull NYU Hosp Joint Dis* 2007; **65**: S11-5.
- 2 Wrighting DM, Andrews NC. Interleukin-6 induces hepcidin expression through STAT3. *Blood* 2006; **108**: 3204-9.
- 3 Smolen JS, Beaulieu A, Rubbert-Roth A, et al. Effect of interleukin-6 receptor inhibition with tocilizumab in patients with rheumatoid arthritis (OPTION study): a double-blind, placebo-controlled, randomised trial. *Lancet* 2008; **371**: 987-97.
- 4 Emery P, Keystone E, Tony HP, et al. IL-6 receptor inhibition with tocilizumab improves treatment outcomes in patients with rheumatoid arthritis refractory to anti-tumour necrosis factor biologicals: results from a 24-week multicentre randomised placebo-controlled trial. *Ann Rheum Dis* 2008; **67**: 1516-23.
- 5 Genovese MC, McKay JD, Nasonov EL, et al. Interleukin-6 receptor inhibition with tocilizumab reduces disease activity in rheumatoid arthritis with inadequate response to disease-modifying antirheumatic drugs: the tocilizumab in combination with traditional disease-modifying antirheumatic drug therapy study. *Arthritis Rheum* 2008; **58**: 2968-80.
- 6 Jones G, Sebba A, Gu J, et al. Comparison of tocilizumab monotherapy versus methotrexate monotherapy in patients with moderate to severe rheumatoid arthritis: the AMBITION study. *Ann Rheum Dis* 2010; **69**: 88-96.

- 1  
2  
3 7 Kremer JM, Blanco R, Brzosko S, et al. Tocilizumab inhibits structural joint  
4 damage in rheumatoid arthritis patients with inadequate responses to methotrexate:  
5 results from the double-blind treatment phase of a randomized placebo-controlled  
6 trial of tocilizumab safety and prevention of structural joint damage at one year.  
7  
8 *Arthritis Rheum* 2011; **63**: 609-21.  
9  
10  
11  
12  
13  
14  
15  
16 8 Nishimoto N, Yoshizaki K, Miyasaka N, et al. Treatment of rheumatoid arthritis  
17 with humanized anti-interleukin-6 receptor antibody: a multicenter, double-blind,  
18 placebo-controlled trial. *Arthritis Rheum* 2004; **50**: 1761-9.  
19  
20  
21  
22  
23  
24  
25 9 Madhok R, Crilly A, Watson J, Capell HA. Serum interleukin 6 levels in  
26 rheumatoid arthritis: correlations with clinical and laboratory indices of disease  
27 activity. *Ann Rheum Dis* 1993; **52**: 232-4.  
28  
29  
30  
31  
32  
33 10 Robak T, Gladalska A, Stepien H, Robak E. Serum levels of interleukin-6 type  
34 cytokines and soluble interleukin-6 receptor in patients with rheumatoid arthritis.  
35  
36 *Mediators Inflamm* 1998; **7**: 347-53.  
37  
38  
39  
40  
41 11 Galicia JC, Tai H, Komatsu Y, et al. Polymorphisms in the IL-6 receptor (IL-6R)  
42 gene: strong evidence that serum levels of soluble IL-6R are genetically influenced.  
43  
44 *Genes Immun* 2004; **5**: 513-6.  
45  
46  
47  
48  
49 12 Marinou I, Walters K, Winfield J, Bax DE, Wilson AG. A gain of function  
50 polymorphism in the interleukin 6 receptor influences RA susceptibility. *Ann*  
51  
52 *Rheum Dis* 2010; **69**: 1191-4.  
53  
54  
55  
56  
57  
58  
59  
60

- 1  
2  
3  
4  
5  
6  
7  
8  
9  
10  
11  
12  
13  
14  
15  
16  
17  
18  
19  
20  
21  
22  
23  
24  
25  
26  
27  
28  
29  
30  
31  
32  
33  
34  
35  
36  
37  
38  
39  
40  
41  
42  
43  
44  
45  
46  
47  
48  
49  
50  
51  
52  
53  
54  
55  
56  
57  
58  
59  
60
- 13 Fishman D, Faulds G, Jeffery R, et al. The effect of novel polymorphisms in the interleukin-6 (IL-6) gene on IL-6 transcription and plasma IL-6 levels, and an association with systemic-onset juvenile chronic arthritis. *J Clin Invest* 1998; **102**: 1369-76.
  - 14 Hingorani AD, Casas JP. The interleukin-6 receptor as a target for prevention of coronary heart disease: a mendelian randomisation analysis. *Lancet* 2012; **379**: 1214-24.
  - 15 Sarwar N, Butterworth AS, Freitag DF, et al. Interleukin-6 receptor pathways in coronary heart disease: a collaborative meta-analysis of 82 studies. *Lancet* 2012; **379**: 1205-13.
  - 16 Ferreira MA, Matheson MC, Duffy DL, et al. Identification of IL6R and chromosome 11q13.5 as risk loci for asthma. *Lancet* 2011; **378**: 1006-14.
  - 17 Fraunberger P, Pfeiffer M, Cremer P, et al. Validation of an automated enzyme immunoassay for interleukin-6 for routine clinical use. *Clin Chem Lab Med* 1998; **36**: 797-801.
  - 18 Claudon A, Vergnaud P, Valverde C, et al. New automated multiplex assay for bone turnover markers in osteoporosis. *Clin Chem* 2008; **54**: 1554-63.
  - 19 R&D Systems Inc. Quantikine<sup>®</sup> ELISA human IL-6 immunoassay. Minneapolis, MN: R&D Systems Inc.; 2011.

- 1  
2  
3  
4  
5  
6  
7  
8  
9  
10  
11  
12  
13  
14  
15  
16  
17  
18  
19  
20  
21  
22  
23  
24  
25  
26  
27  
28  
29  
30  
31  
32  
33  
34  
35  
36  
37  
38  
39  
40  
41  
42  
43  
44  
45  
46  
47  
48  
49  
50  
51  
52  
53  
54  
55  
56  
57  
58  
59  
60
- 20 R&D Systems Inc. Quantikine<sup>®</sup> ELISA human IL-6 sR immunoassay. Minneapolis, MN: R&D Systems Inc.; 2009.
- 21 Irizarry RA, Bolstad BM, Collin F, Cope LM, Hobbs B, Speed TP. Summaries of AffymetrixGeneChip probe level data. *Nucleic Acids Res* 2003;31:e15.
- 22 Gregersen PK, Silver J, Winchester RJ. The shared epitope hypothesis: an approach to understanding the molecular genetics of susceptibility to rheumatoid arthritis. *Arthritis Rheum* 1987; **30**: 1205-13.
- 23 Benjamini Y, Hochberg Y. Controlling the false discovery rate: a practical and powerful approach to multiple testing. *J R Stat Soc* 1995; **57**: 289-300.
- 24 Chung SJ, Kwon YJ, Park MC, Park YB, Lee SK. The correlation between increased serum concentrations of interleukin-6 family cytokines and disease activity in rheumatoid arthritis patients. *Yonsei Med J* 2011; **52**: 113-20.
- 25 Heinrich PC, Castell JV, Andus T. Interleukin-6 and the acute phase response. *Biochem J* 1990; **265**: 621-36.
- 26 Littman BH. Tocilizumab and missed personalized medicine opportunities for patients with rheumatoid arthritis? *Arthritis Rheum* 2009; **60**: 1565-6.
- 27 Buttgereit F, Doering G, Schaeffler A, et al. Efficacy of modified-release versus standard prdnisone to reduce duration of morning stiffness of the joints in rheumatoid arthritis (CAPRA-1): a double-blind, randomised controlled trial. *Lancet* 2008; **371**: 205-14

- 1  
2  
3  
4  
5  
6  
7  
8  
9  
10  
11  
12  
13  
14  
15  
16  
17  
18  
19  
20  
21  
22  
23  
24  
25  
26  
27  
28  
29  
30  
31  
32  
33  
34  
35  
36  
37  
38  
39  
40  
41  
42  
43  
44  
45  
46  
47  
48  
49  
50  
51  
52  
53  
54  
55  
56  
57  
58  
59  
60
- 28 Kirwan JR, Clarke L, Hunt LP, et al. Effect of novel therapeutic glucocorticoids on circadian rhythms of hormones and cytokines in rheumatoid arthritis. *Ann NY Acad Sci* 2010; **1193**: 127-33.
- 29 Rafiq S, Frayling TM, Murray A, et al. A common variant of the interleukin 6 receptor (IL-6r) gene increases IL-6r and IL-6 levels, without other inflammatory effects. *Genes Immun* 2007; **8**: 552-9.
- 30 De Benedetti F, Pignatti P, Gerloni V, et al. Differences in synovial fluid cytokine levels between juvenile and adult rheumatoid arthritis. *J Rheumatol* 1997; **24**: 1403-9.
- 31 Frieling JT, Sauerwein RW, Wijdenes J, Hendriks T, van der Linden CJ. Soluble interleukin 6 receptor in biological fluids from human origin. *Cytokine* 1994; **6**: 376-81.
- 32 Wang J, Bansal AT, Martin M, et al. Genome-wide association analysis implicates the involvement of eight loci with response to tocilizumab for the treatment of rheumatoid arthritis. *Pharmacogenomics J* 2013; **13**: 235-41.



## TABLES

**Table 1.** Demographics of patients from whom biological samples were collected and analysed and whose data passed a quality control check

| Sample type        | DNA               |                   |                     | RNA               | Serum             |                   |                     |                   |                   |
|--------------------|-------------------|-------------------|---------------------|-------------------|-------------------|-------------------|---------------------|-------------------|-------------------|
| Study              | OPTION            | RADIATE           | TOWARD              | RADIATE           | OPTION            | LITHE             | TOWARD              | AMBITION          | RADIATE           |
| Patient population | MTX-IR            | aTNF-IR           | DMARD-IR            | aTNF-IR           | MTX-IR            | MTX-IR            | DMARD-IR            | MTX naive or free | aTNF-IR           |
| Treatment          | 8 mg/kg TCZ + MTX | 8 mg/kg TCZ + MTX | 8 mg/kg TCZ + DMARD | 8 mg/kg TCZ + MTX | 8 mg/kg TCZ + MTX | 8 mg/kg TCZ + MTX | 8 mg/kg TCZ + DMARD | 8 mg/kg TCZ + MTX | 8 mg/kg TCZ + MTX |
|                    | 4 mg/kg TCZ + MTX | 4 mg/kg TCZ + MTX |                     | 4 mg/kg TCZ + MTX | 4 mg/kg TCZ + MTX | 4 mg/kg TCZ + MTX |                     |                   | 4 mg/kg TCZ + MTX |
|                    | MTX               | MTX               | DMARD               | MTX               | MTX               | MTX               | DMARD               | MTX               | MTX               |
| Total patients, n  | 286               | 178               | 463                 | 217               | 603               | 1126              | 1010                | 581               | 431               |
| TCZ, n             | 189               | 119               | 301                 | 151               | 409               | 753               | 661                 | 244               | 289               |
| MTX, n             | 97                | 59                | 162                 | 66                | 194               | 373               | 349                 | 337               | 142               |
| Age, years         | 51.3 (11.1)       | 51.5 (12.4)       | 54.2 (12.6)         | 53.2 (11.9)       | 51.0 (12.2)       | 51.9 (12.4)       | 53.4 (12.9)         | 50.3 (13.0)       | 52.9 (12.6)       |
| Female, %          | 79.0              | 79.8              | 81.0                | 82.40             | 81.8              | 82.9              | 81.7                | 80.4              | 81.4              |
| Height, cm         | 163 (9)           | 165 (8)           | 164 (9)             | 165 (8)           | 162 (9)           | 162 (9)           | 163 (9)             | 163 (9)           | 165 (8)           |
| Weight, kg         | 73 (17)           | 77 (19)           | 76 (18)             | 77 (20)           | 79 (17)           | 73 (19)           | 74 (19)             | 73 (18)           | 75 (18)           |
| RA duration, years | 7.8 (7.3)         | 11.1 (8.3)        | 9.7 (9.1)           | 12.1 (9.6)        | 7.6 (7.3)         | 9.2 (8.0)         | 9.6 (8.8)           | 6.4 (8.2)         | 11.6 (9.1)        |
| RF positive, %     | 76.2              | 79.8              | 75.6                | 76.5              | 77.6              | 82.1              | 77.1                | 72.5              | 75.2              |
| White, %           | 73.8              | 93.3              | 76.2                | Not applicable    | Not applicable    |                   |                     |                   |                   |
| TCZ, n             | 141               | 109               | 233                 |                   |                   |                   |                     |                   |                   |
| MTX, n             | 70                | 57                | 120                 |                   |                   |                   |                     |                   |                   |
| DAS28              | 6.8 (0.9)         | 6.8 (1)           | 6.6 (1)             | 6.8 (0.9)         | 6.8 (0.9)         | 6.5 (0.9)         | 6.7 (1.0)           | 6.8 (0.9)         | 6.8 (1.0)         |
| HAQ                | 1.6 (0.6)         | 1.7 (0.6)         | 1.5 (0.6)           | 1.7 (0.6)         | 1.6 (0.6)         | 1.5 (0.6)         | 1.5 (0.6)           | 1.5 (0.6)         | 1.7 (0.6)         |
| SJC                | 20.9 (11.3)       | 18.8 (10.6)       | 20.5 (11.9)         | 18.1 (9.8)        | 20.0 (11.2)       | 16.9 (9.4)        | 19.6 (11.5)         | 19.8 (11.2)       | 18.9 (10.6)       |
| TJC                | 32.3 (15.2)       | 31.2 (15.2)       | 30.1 (15.8)         | 31.4 (15.1)       | 32.6 (15.6)       | 28.3 (14.7)       | 30.0 (15.7)         | 31.9 (14.4)       | 31.1 (15.6)       |
| CRP                | 2.4 (2.9)         | 3.7 (4.2)         | 2.3 (2.9)           | 3.3 (3.8)         | 2.6 (3.0)         | 2.2 (2.5)         | 2.6 (3.8)           | 3.0 (3.3)         | 3.2 (3.8)         |

1  
2  
3  
4  
5 aTNF, anti-tumour necrosis factor; CRP, C-reactive protein; DAS28 , Disease Activity Score using 28 joints; DMARD, disease-  
6  
7 modifying antirheumatic drug; HAQ, Health Assessment Questionnaire; IR, inadequate responder; MTX, methotrexate; RA,  
8  
9 rheumatoid arthritis; RF, rheumatoid factor; SJC, swollen joint count; TCZ, tocilizumab; TJC, tender joint count.  
10

11 Values with numbers in parentheses are mean (SD).  
12  
13  
14  
15  
16  
17  
18  
19  
20  
21  
22  
23  
24  
25  
26  
27  
28  
29  
30  
31  
32  
33  
34  
35  
36  
37  
38  
39  
40  
41  
42  
43  
44  
45  
46  
47  
48  
49

1  
2  
3  
4  
5  
6  
7  
8  
9  
10  
11  
12  
13  
14  
15  
16  
17  
18  
19  
20  
21  
22  
23  
24  
25  
26  
27  
28  
29  
30  
31  
32  
33  
34  
35  
36  
37  
38  
39  
40  
41  
42  
43  
44  
45  
46  
47  
48  
49

**Table 2.** Summary of markers investigated. For the DNA markers, SNPs in IL-6 and IL-6R are considered tier 1, IL-6 network genes are considered tier 2, and IL-6 pathway genes are considered tier 3

| Sample type      | Target gene        | Analytes, n          | Assay (manufacturer)                                                   |
|------------------|--------------------|----------------------|------------------------------------------------------------------------|
| <b>Primary</b>   |                    |                      |                                                                        |
| DNA              | <i>IL-6</i>        | 10 SNPs              | Bead-Chip arrays HumanHap550k version 3.0, OPA custom array (Illumina) |
|                  | <i>IL-6R</i>       | 18 SNPs              |                                                                        |
| RNA              | <i>IL-6R</i>       | 3 probe sets         | GeneChip Human Genome U133 Plus 2.0 Array (Affymetrix)                 |
| Serum            | <i>IL-6</i>        | 1                    | Human IL-6 Immunoassay (Quantikine)                                    |
|                  | <i>sIL-6R</i>      | 1                    | Human sIL-6R Immunoassay (Quantikine)                                  |
| <b>Secondary</b> |                    |                      |                                                                        |
| DNA              | IL-6 network genes | 233 SNPs (22 genes)  | Bead-Chip arrays HumanHap550k version 3.0, OPA custom array (Illumina) |
|                  | IL-6 pathway genes | 1004 SNPs (67 genes) |                                                                        |
| RNA              | <i>IL-6ST</i>      | 7 probe sets         | GeneChip Human Genome U133 Plus 2.0 Array (Affymetrix)                 |

IL-6, interleukin 6; IL-6R, IL-6 receptor; IL-6ST, IL-6 signal transducer; sIL-6R, soluble IL-6R; SNP, single-nucleotide polymorphism.

**Table 3.** Association of markers with baseline disease activity. All results for serum markers are shown. For RNA, the probe sets within each gene were strongly correlated. One probe set each in IL-6R and IL-6ST is shown. For DNA, only associations with raw  $P < 0.01$  (tier 1) and FDR  $P < 0.05$  (tiers 2 and 3) were shown. FDR was calculated within the population (white or all) and within the tier

| Serum protein and RNA markers |         |            |         |                 |              |         |                 |                      |                     |
|-------------------------------|---------|------------|---------|-----------------|--------------|---------|-----------------|----------------------|---------------------|
|                               |         | Serum IL-6 |         |                 | Serum sIL-6R |         |                 | IL-6R<br>217489_s_at | IL-6ST<br>234967_at |
| End point                     |         | AMBITION   | RADIATE | Pooled DMARD-IR | AMBITION     | RADIATE | Pooled DMARD-IR | RADIATE              | RADIATE             |
| DAS28                         | n       | 480        | 322     | 2286            | 577          | 423     | 2620            | 217                  | 217                 |
|                               | $\beta$ | 0.209      | 0.257   | 0.201           | -0.007       | 0.075   | 0.054           | 0.109                | -0.04               |
|                               | $r^2$   | 0.051      | 0.072   | 0.044           | 0            | 0.006   | 0.003           | 0.013                | 0.002               |
|                               | p       | <0.0001    | <0.0001 | <0.0001         | 0.8478       | 0.1018  | 0.0044          | 0.09                 | 0.54                |
| TJC                           | n       | 481        | 327     | 2305            | 580          | 428     | 2642            | 217                  | 217                 |
|                               | $\beta$ | -0.186     | 1.455   | 0.138           | -0.154       | 1.28    | 0.054           | 0.27                 | 1.276               |
|                               | $r^2$   | 0          | 0.009   | 0               | 0            | 0.007   | 0               | 0                    | 0.007               |
|                               | p       | 0.7742     | 0.0938  | 0.6611          | 0.7967       | 0.0889  | 0.8558          | 0.79                 | 0.2140              |
| SJC                           | n       | 481        | 327     | 2305            | 580          | 428     | 2642            | 217                  | 217                 |
|                               | $\beta$ | 0.247      | 1.421   | 0.813           | -0.679       | -0.069  | 0.52            | -0.864               | 0.218               |
|                               | $r^2$   | 0          | 0.018   | 0.006           | 0.004        | 0       | 0.002           | 0.008                | 0                   |
|                               | p       | 0.6279     | 0.0158  | 0.0003          | 0.1424       | 0.8938  | 0.013           | 0.1950               | 0.7440              |
| ESR                           | n       | 481        | 327     | 2299            | 580          | 428     | 2635            | 217                  | 217                 |
|                               | $\beta$ | 0.19       | 0.172   | 0.151           | 0.039        | -0.003  | 0.023           | 0.164                | -0.132              |
|                               | $r^2$   | 0.088      | 0.091   | 0.055           | 0.004        | 0       | 0.001           | 0.082                | 0.053               |

|                    | p                | <0.0001 | <0.0001    | <0.0001    | 0.132  | 0.9158    | 0.0672 | <0.0001 | 0.0007  |         |       |
|--------------------|------------------|---------|------------|------------|--------|-----------|--------|---------|---------|---------|-------|
| CRP                | n                | 481     | 327        | 2305       | 580    | 428       | 2642   | 217     | 217     |         |       |
|                    | $\beta$          | 0.363   | 0.429      | 0.35       | 0.007  | 0.019     | 0.019  | 0.228   | -0.145  |         |       |
|                    | $r^2$            | 0.288   | 0.358      | 0.309      | 0      | 0.001     | 0.001  | 0.089   | 0.036   |         |       |
|                    | p                | <0.0001 | <0.0001    | <0.0001    | 0.8103 | 0.5935    | 0.1242 | <0.0001 | 0.005   |         |       |
| HAQ                | n                | 480     | 324        | 2165       | 579    | 425       | 2465   | 217     | 217     |         |       |
|                    | $\beta$          | 0.085   | 0.145      | 0.084      | 0.002  | 0.074     | 0.024  | 0.048   | -0.103  |         |       |
|                    | $r^2$            | 0.019   | 0.062      | 0.018      | 0      | 0.016     | 0.002  | 0.007   | 0.031   |         |       |
|                    | p                | 0.0022  | <0.0001    | <0.0001    | 0.933  | 0.0089    | 0.0504 | 0.22    | 0.009   |         |       |
| <b>DNA markers</b> |                  |         |            |            |        |           |        |         |         |         |       |
| Tier               | Gene             | Chr     | SNP        | Population | MAF    | End point | n      | $\beta$ | SE      | Raw P   | FDR P |
| 1                  | <i>IL-6R</i>     | 1       | rs1386821  | White      | 0.17   | HAQ       | 708    | 0.135   | 0.041   | 0.001   | 0.18  |
|                    |                  |         |            | All        | 0.15   | HAQ       | 845    | 0.118   | 0.040   | 0.004   | 0.52  |
|                    | <i>TOLLIP</i>    | 11      | rs5743899  | All        | 0.22   | ESR       | 893    | 0.15    | 0.03449 | 1.5E-05 | 0.046 |
|                    | <i>RUNX1</i>     | 21      | rs2252585  | All        | 0.32   | ESR       | 905    | 0.1209  | 0.02884 | 3.0E-05 | 0.046 |
| 3                  | <i>IL-1RAPL1</i> | 23      | rs12559028 | All        | 0.49   | SJC       | 905    | 2.182   | 0.5349  | 4.9E-05 | 0.050 |
|                    |                  |         |            | All        | 0.44   | SJC       | 905    | 2.27    | 0.5424  | 3.1E-05 | 0.046 |
|                    |                  |         |            | All        | 0.38   | SJC       | 905    | 2.321   | 0.5592  | 3.6E-05 | 0.046 |
|                    |                  |         |            | All        | 0.45   | ESR       | 897    | 0.1181  | 0.02853 | 3.8E-05 | 0.046 |

$\beta$ , regression coefficient, representing the difference in the end point corresponding to standard deviation in marker value; Chr, chromosome; CRP, C-reactive protein; DAS28, Disease Activity Score using 28 joints; DMARD, disease-modifying antirheumatic drug; ESR, erythrocyte sedimentation rate; HAQ, Health Assessment Questionnaire; IL-6ST, IL-6 signal transducer; IR, inadequate responder; MAF, minor allele frequency; MTX, methotrexate; SJC, swollen joint count; TCZ, tocilizumab; TJC, tender joint count.

**Table 4.** Association of baseline markers with treatment response measured by change in DAS28 from baseline at week 16. Baseline DAS28 and TCZ dose were included in the model as covariates. FDR was calculated within the white or all population and within the tier

| All association results for primary DNA markers |            |                   |      |         |      |       |                     |      |         |      |        |
|-------------------------------------------------|------------|-------------------|------|---------|------|-------|---------------------|------|---------|------|--------|
| Gene                                            | SNP        | All DMARD-IR, TCZ |      |         |      |       | White DMARD-IR, TCZ |      |         |      |        |
|                                                 |            | MAF               | n    | $\beta$ | SE   | Raw P | MAF                 | n    | $\beta$ | SE   | Raw P  |
| <i>IL-6</i>                                     | rs12700386 | 0.19              | 583  | 0.22    | 0.11 | 0.049 | 0.18                | 468  | 0.16    | 0.13 | 0.20   |
|                                                 | rs2069833  | 0.35              | 584  | -0.08   | 0.08 | 0.34  | 0.42                | 469  | -0.13   | 0.09 | 0.18   |
|                                                 | rs2069837  | 0.08              | 586  | -0.11   | 0.15 | 0.44  | 0.08                | 471  | -0.05   | 0.16 | 0.75   |
|                                                 | rs2066992  | 0.12              | 586  | -0.09   | 0.12 | 0.49  | 0.06                | 471  | -0.11   | 0.21 | 0.61   |
|                                                 | rs2069840  | 0.32              | 584  | 0.24    | 0.09 | 0.007 | 0.33                | 469  | 0.30    | 0.10 | 0.0026 |
|                                                 | rs1554606  | 0.4               | 586  | -0.10   | 0.08 | 0.23  | 0.45                | 471  | -0.15   | 0.09 | 0.12   |
|                                                 | rs2069845  | 0.4               | 583  | -0.10   | 0.08 | 0.23  | 0.45                | 468  | -0.15   | 0.09 | 0.12   |
|                                                 | rs2069861  | 0.07              | 584  | -0.10   | 0.15 | 0.53  | 0.08                | 469  | -0.11   | 0.16 | 0.50   |
|                                                 | rs10242595 | 0.36              | 586  | -0.02   | 0.08 | 0.86  | 0.32                | 471  | -0.02   | 0.10 | 0.80   |
| rs11766273                                      | 0.07       | 586               | 0.10 | 0.16    | 0.53 | 0.08  | 471                 | 0.05 | 0.17    | 0.75 |        |
| <i>IL-6R</i>                                    | rs1386821  | 0.15              | 586  | 0.02    | 0.12 | 0.87  | 0.17                | 471  | 0.06    | 0.13 | 0.67   |
|                                                 | rs4075015  | 0.39              | 584  | -0.06   | 0.09 | 0.50  | 0.41                | 469  | -0.07   | 0.10 | 0.46   |
|                                                 | rs6684439  | 0.41              | 586  | 0.03    | 0.08 | 0.76  | 0.39                | 471  | 0.06    | 0.10 | 0.55   |
|                                                 | rs4845618  | 0.43              | 582  | 0.03    | 0.08 | 0.74  | 0.44                | 467  | 0.00    | 0.09 | 0.99   |
|                                                 | rs8192282  | 0.15              | 581  | -0.09   | 0.12 | 0.46  | 0.16                | 468  | -0.08   | 0.13 | 0.53   |
|                                                 | rs7549250  | 0.43              | 575  | 0.07    | 0.08 | 0.43  | 0.44                | 462  | 0.02    | 0.09 | 0.81   |
|                                                 | rs4553185  | 0.43              | 586  | 0.04    | 0.08 | 0.60  | 0.44                | 471  | 0.01    | 0.09 | 0.90   |
|                                                 | rs4845623  | 0.44              | 586  | -0.01   | 0.08 | 0.92  | 0.41                | 471  | 0.01    | 0.10 | 0.89   |

1  
2  
3  
4  
5  
6  
7  
8  
9  
10  
11  
12  
13  
14  
15  
16  
17  
18  
19  
20  
21  
22  
23  
24  
25  
26  
27  
28  
29  
30  
31  
32  
33  
34  
35  
36  
37  
38  
39  
40  
41  
42  
43  
44  
45  
46  
47  
48  
49

|  |            |      |     |       |      |      |      |     |       |      |      |
|--|------------|------|-----|-------|------|------|------|-----|-------|------|------|
|  | rs4537545  | 0.44 | 586 | -0.04 | 0.08 | 0.60 | 0.41 | 471 | -0.01 | 0.10 | 0.93 |
|  | rs4129267  | 0.41 | 586 | -0.02 | 0.08 | 0.77 | 0.4  | 471 | 0.02  | 0.10 | 0.87 |
|  | rs8192284  | 0.41 | 582 | -0.03 | 0.08 | 0.76 | 0.4  | 467 | 0.02  | 0.10 | 0.87 |
|  | rs11265618 | 0.17 | 586 | -0.05 | 0.11 | 0.64 | 0.17 | 471 | -0.04 | 0.13 | 0.73 |
|  | rs4329505  | 0.16 | 582 | -0.03 | 0.11 | 0.81 | 0.16 | 467 | -0.02 | 0.13 | 0.87 |
|  | rs4240872  | 0.24 | 586 | 0.03  | 0.10 | 0.79 | 0.23 | 471 | -0.01 | 0.11 | 0.93 |
|  | rs4509570  | 0.24 | 580 | 0.02  | 0.10 | 0.85 | 0.23 | 466 | -0.02 | 0.11 | 0.83 |
|  | rs2229238  | 0.19 | 584 | -0.03 | 0.11 | 0.75 | 0.19 | 469 | 0.00  | 0.12 | 0.98 |
|  | rs7514452  | 0.19 | 586 | -0.03 | 0.11 | 0.77 | 0.19 | 471 | 0.00  | 0.12 | 0.98 |
|  | rs7526293  | 0.2  | 584 | -0.04 | 0.10 | 0.71 | 0.2  | 469 | -0.03 | 0.12 | 0.79 |

**DNA markers analyzed in the pooled DMARD-IR population with an FDR\* of <0.1**

| Tier | Gene         | SNP       | Population | MAF  | n   | $\beta$ | SE   | RAW P   | FDR P |
|------|--------------|-----------|------------|------|-----|---------|------|---------|-------|
| 1    | <i>IL-6</i>  | rs2069840 | White      | 0.33 | 469 | 0.30    | 0.10 | 0.0026  | 0.073 |
| 3    | <i>PTPN2</i> | rs973767  | All        | 0.14 | 586 | 0.48    | 0.12 | 7.2E-05 | 0.072 |
|      |              |           | White      | 0.16 | 471 | 0.53    | 0.13 | 5.7E-05 | 0.057 |

$\beta$ , regression coefficient, representing the difference in DAS28 corresponding to each SD in marker value; DAS28, Disease Activity Score using 28 joints; DMARD, disease-modifying antirheumatic drug; FDR, false discovery rate; IL-6, interleukin-6; IL-6R, IL-6 receptor; IR, inadequate responder; MAF, minor allele frequency; SNP, single nucleotide polymorphism; TCZ, tocilizumab.

FIGURE

**Figure 1.** Serum IL-6 concentration association with response to **treatment**. Forest plots show the effect and 95% CI for the association of IL-6 with cDAS28 at 16 weeks across treatment lines. cDAS28, change in DAS28 from baseline at week 16; CI, confidence interval; DMARD, disease-modifying antirheumatic drug; IR, inadequate responder; MTX, methotrexate; SD, standard deviation; TCZ, tocilizumab; TNF, tumour necrosis factor. ●, MTX/DMARD; ●, TCZ+MTX/DMARD.

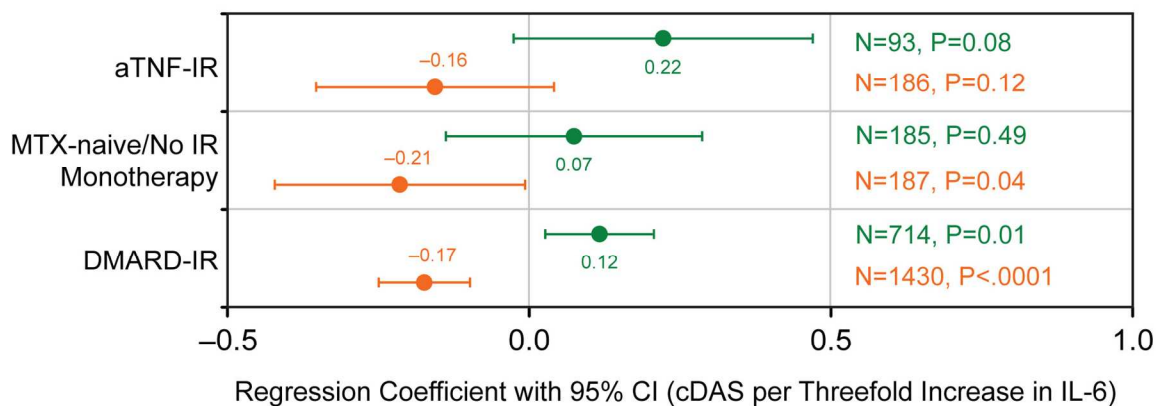

Supplement: bmjopen-2013-003199.draft_revisions.pdf [file bmjopen-2013-003199.draft_revisions.pdf]
